# Supplementary material for: Are job strain and sleep disturbances prognostic factors for neck/shoulder/arm pain? A cohort study of a general population of working age in Sweden
Source: PubMed Central journal article supplement — BMJ Open. 2014 Jul 8;4(7):e005103. doi: 10.1136/bmjopen-2014-005103 (PMC4091459; doi:10.1136/bmjopen-2014-005103), 2014-07-08
Supplement: bmjopen-2014-005103.draft_revisions.pdf [file bmjopen-2014-005103.draft_revisions.pdf]

# BMJ Open

## Are job Strain and Sleep Disturbances Prognostic Factors for Neck/Shoulder/Arm pain? A Cohort Study of a General Population of Working Age in Sweden

|                                 |                                                                                                                                                                                                                                                                                                                                                                                                                                                                                                                                                                                                                                                                                                              |
|---------------------------------|--------------------------------------------------------------------------------------------------------------------------------------------------------------------------------------------------------------------------------------------------------------------------------------------------------------------------------------------------------------------------------------------------------------------------------------------------------------------------------------------------------------------------------------------------------------------------------------------------------------------------------------------------------------------------------------------------------------|
| Journal:                        | <i>BMJ Open</i>                                                                                                                                                                                                                                                                                                                                                                                                                                                                                                                                                                                                                                                                                              |
| Manuscript ID:                  | bmjopen-2014-005103                                                                                                                                                                                                                                                                                                                                                                                                                                                                                                                                                                                                                                                                                          |
| Article Type:                   | Research                                                                                                                                                                                                                                                                                                                                                                                                                                                                                                                                                                                                                                                                                                     |
| Date Submitted by the Author:   | 30-Mar-2014                                                                                                                                                                                                                                                                                                                                                                                                                                                                                                                                                                                                                                                                                                  |
| Complete List of Authors:       | Rasmussen-Barr, Eva; Karolinska Institutet, Institute of Environmental Medicine; Karolinska Institutet, Division of Physiotherapy, Department of Neurobiology, Caring Sciences, and Society<br>Grooten, Wilhelmus; Karolinska Institutet, Division of Physiotherapy, Department of Neurobiology, Caring Sciences, and Society<br>Hallqvist, Johan; Karolinska Universitetssjukhuset, Department of Public Health Sciences; Uppsala University, Department of Public Health and Caring Sciences<br>Holm, Lena; Karolinska Institutet, Institute of Environmental Medicine<br>Skillgate, Eva; Karolinska Institutet, Institute of Environmental Medicine; Scandinavian College of Naprapathic Manual Medicine, |
| <b>Primary Subject Heading</b>: | Epidemiology                                                                                                                                                                                                                                                                                                                                                                                                                                                                                                                                                                                                                                                                                                 |
| Secondary Subject Heading:      | Occupational and environmental medicine                                                                                                                                                                                                                                                                                                                                                                                                                                                                                                                                                                                                                                                                      |
| Keywords:                       | Musculoskeletal disorders < ORTHOPAEDIC & TRAUMA SURGERY, SLEEP MEDICINE, PREVENTIVE MEDICINE, PRIMARY CARE, REHABILITATION MEDICINE, EPIDEMIOLOGY                                                                                                                                                                                                                                                                                                                                                                                                                                                                                                                                                           |
|                                 |                                                                                                                                                                                                                                                                                                                                                                                                                                                                                                                                                                                                                                                                                                              |

SCHOLARONE™  
Manuscripts

1  
2  
3 1 Are Job Strain and Sleep Disturbances Prognostic Factors for  
4  
5 2 Neck/Shoulder/Arm Pain? A Cohort Study of a General Population of Working  
6  
7 3 Age in Sweden  
8  
9  
10 4  
11  
12 5  
13

14 **Authors:**

15  
16  
17 7 *Rasmussen-Barr E<sup>1,2</sup>, Grooten WJA<sup>2</sup>, Hallqvist J<sup>3,4</sup>, Holm LW<sup>1</sup>, Skillgate E<sup>1,5</sup>*  
18

19 8 <sup>1</sup>Institute of Environmental Medicine, Karolinska Institutet, Box 210, SE-17177, Stockholm,  
20  
21 9 Sweden  
22

23 10 <sup>2</sup>Division of Physiotherapy, Department of Neurobiology, Caring Sciences, and Society,  
24  
25 11 Karolinska Institutet, Huddinge, Sweden  
26

27 12 <sup>3</sup>Department of Public Health Sciences, Karolinska Universitetssjukhuset, SE-17176,  
28  
29 13 Stockholm, Sweden  
30

31 14 <sup>4</sup>Department of Public Health and Caring Sciences, Uppsala University, Box 564, SE-75122,  
32  
33 15 Uppsala, Sweden  
34

35 16 <sup>5</sup>Scandinavian College of Naprapathic Manual Medicine, Kräftriket 23A, SE-11419,  
36  
37 17 Stockholm, Sweden  
38  
39

40 **Corresponding author:**

41  
42 19 Eva Rasmussen Barr  
43 20 Institute of Environmental Medicine, Karolinska Institutet  
44 21 Box 210  
45 22 SE-17177 Stockholm, Sweden  
46 23 [eva.rasmussen.barr@ki.se](mailto:eva.rasmussen.barr@ki.se)  
47 24

48  
49 25 Word count: 3 326  
50 26

51 27 Key words: musculoskeletal diseases, prevention, sleep, stress, work  
52 28  
53  
54  
55 29  
56  
57  
58 30

1  
2  
3 **1 ABSTRACT (word count 253)**  
4

5  
6 2 Background: It is proposed that workers exposed to job strain are at risk of stress-related  
7  
8 3 diseases such as neck/shoulder/arm (NSAP) pain. One factor that may influence the impact of  
9  
10 4 job strain on the prognosis of NSAP is sleep disturbances.  
11

12  
13 5 Aim: To study if job strain and sleep disturbances are prognostic factors for the development  
14  
15 6 of troublesome NSAP, and to determine whether sleep disturbances is an effect measure  
16  
17 7 modifier in the association between job strain and troublesome NSAP.  
18

19  
20  
21 8 Methods: A population-based cohort of individuals with occasional NSAP (n = 6,979)  
22  
23 9 answered surveys in 2006 and 2010. Logistic regressions were used to assess the associations  
24  
25 10 between the exposures; job strain, active and passive job and sleep disturbances, and the  
26  
27 11 development of troublesome NSAP. Stratified analysis was used to assess potential effect  
28  
29 12 measure modification.  
30

31  
32  
33 13 Results: The odds ratios for developing troublesome NSAP were in individuals exposed to  
34  
35 14 active job 1.3 (95% CI 1.1–1.5); passive job 1.2 (95% CI 0.9–1.4); job strain 1.5 (95% CI  
36  
37 15 1.0–2.4); mild sleep disturbances 1.4 (95% CI 1.3–1.6); and severe sleep disturbances 2.2  
38  
39 16 (95% CI 1.6–3.0). Job strain and an active job situation were associated with persistent or  
40  
41 17 troublesome NSAP in individuals with sleep disturbances, but not in individuals with no sleep  
42  
43 18 disturbances.  
44

45  
46  
47 19 Conclusion: Job strain and an active job situation as well as sleep disturbances are all  
48  
49 20 independent prognostic factors that should be taken into account when implementing  
50  
51 21 preventive measures meant to minimize the risk of troublesome neck/shoulder/arm pain  
52  
53 22 among individuals of the general working-age population.  
54

55  
56  
57 23

1  
2  
3 1 **Strengths and limitations to the study**  
4  
5

- 6 2 • This study adds new information to the limited body of knowledge about factors that  
7 3 are of importance for the risk of developing troublesome neck/shoulder/arm pain  
8 4 (NSAP) among individuals of the general working-age population who report  
9 5 occasional pain at baseline.  
10 6 • The strength of the current study lies in its prospective design based on a general  
11 7 population of working age and in that prognostic factors were assessed prior to the  
12 8 outcome.  
13 9 • A further strength is the complete study sample and that several potential confounders  
14 10 were taken into account, even though we cannot rule out the risk of unmeasured or  
15 11 residual confounding.  
16 12 • A limitation of the study is that we have no information about the duration of the  
17 13 exposures prior to baseline or about the presence of the exposures during the four-year  
18 14 follow-up period. This may limit the interpretation of the results.  
19 15  
20 16  
21 17  
22 18  
23 19  
24 20  
25 21  
26 22  
27 23  
28 24  
29 25  
30 26  
31 27  
32 28  
33 29  
34 30  
35 31  
36 32  
37 33  
38 34  
39 35  
40 36  
41 37  
42 38  
43 39  
44 40  
45 41  
46 42  
47 43  
48 44  
49 45  
50 46  
51 47  
52 48  
53 49  
54 50  
55 51  
56 52  
57 53  
58 54  
59 55  
60 56
- This study adds new information to the limited body of knowledge about factors that are of importance for the risk of developing troublesome neck/shoulder/arm pain (NSAP) among individuals of the general working-age population who report occasional pain at baseline.
  - The strength of the current study lies in its prospective design based on a general population of working age and in that prognostic factors were assessed prior to the outcome.
  - A further strength is the complete study sample and that several potential confounders were taken into account, even though we cannot rule out the risk of unmeasured or residual confounding.
  - A limitation of the study is that we have no information about the duration of the exposures prior to baseline or about the presence of the exposures during the four-year follow-up period. This may limit the interpretation of the results.

## 1 INTRODUCTION (word count 3326)

2 The prevalence of musculoskeletal pain is overall high.[1] Among workers neck/shoulder/arm  
3 pain (NSAP) is common causing personal suffering and an economic burden for society. [2-4]  
4 NSAP may be seen as a recurrent disorder that follows a course and remissions,  
5 exacerbations, and prior pain episodes seem to increase the risk of subsequent pain  
6 episodes.[5-7] Although most people will experience neck pain to some degree in their  
7 lifetimes, not everybody will experience chronic or troublesome neck pain.[8] Several  
8 determinants of the course of pain in the neck/shoulder have been suggested. Results from a  
9 cohort study in Sweden on the long-term prognosis of neck/shoulder pain showed that  
10 biomechanical exposure such as manual handling  $\geq 50\text{N}$  and working with one's hands above  
11 the shoulder level negatively influence the prognosis.[9] Further, individuals who miss work,  
12 taking sick leave because of neck pain, seem to be at greater risk for subsequent episodes of  
13 lost time at work and prolonged disability.[7] Studying modifiable prognostic determinants of  
14 NSAP is important because it may help prevent severe conditions and promote recovery. A  
15 recent study of people who experience occasional neck pain reported that social factors, such  
16 as economic stress and family income, were associated with a poor prognosis (i.e.,  
17 development of troublesome neck pain).[10] Work-related factors—physical, as well as  
18 psychosocial—are considered important for the course of neck/shoulder pain.[7 11] One  
19 important psychosocial model for neck/shoulder pain is the job strain model,[12-15] where  
20 job strain is described as a combination of high psychological job demands with low job  
21 decision latitude. The model further defines a combination of high job demands and high job  
22 control as an active job situation and a combination of low job control and low job demands  
23 as a passive job situation. It has been proposed that workers exposed to job strain face an  
24 increased risk of psychological strain and stress-related disease associated with unhealthy

1 lifestyle factors that may also affect the prognosis of neck pain.[16-18] Recent research,  
2 however, has yielded contradictory results; some studies report a strong association between  
3 job strain and the prognosis and risk of NSAP, [19-20] while others report no associations.[8  
4 21]According to a recent review, several studies on job strain and NSAP are cross-sectional;  
5 thus, no assessment of temporality can be made. [22]

6  
7 Several factors most likely modify the trajectory from occasional to troublesome NSAP. One  
8 debated condition that may be associated with the impact of job strain is exhaustion [16] in  
9 terms of prolonged fatigue and sleep disturbances.[12] While sleep is considered an important  
10 part of physical restoration, curtailment of sleep by itself may be associated with the  
11 prognosis of musculoskeletal pain. Diverse associations between work-related psychosocial  
12 factors and sleep disturbances have been shown.[23-26]However, few studies explore whether  
13 sleep disturbances play a role as an effect measure modifier for the association between job  
14 strain and the prognosis of NSAP.[12 23]

15 To our knowledge, no longitudinal study has investigated the effects of exposure to job strain,  
16 and sleep disturbances in a general population of working age reporting occasional NSAP at  
17 baseline. We therefore sought to study whether these conditions are prognostic factors for the  
18 development of troublesome NSAP. We further sought to study whether sleep disturbances  
19 act as an effect measure modifier in the association between job strain and troublesome  
20 NSAP.

## 21 **METHODS**

### 22 **Study design**

1 This longitudinal cohort study is based on the Stockholm Public Health Cohort, (n=25,167), a  
2 population-based cohort set up by the Stockholm County Council to gather information about  
3 the determinants and consequences of significant contributors to the burden of disease.[27]

#### 4 **Study population**

5 Participants aged 18-84 years were selected using area-stratified random samples of the  
6 Stockholm population, an urban region including 24 municipalities with approximately 1.4  
7 million inhabitants (2002). Details about the data collection have been reported  
8 elsewhere.[27] Selected individuals (n = 56,634) received a baseline postal or Web-based  
9 questionnaire in 2006. Sixty-one percent of those (n = 34,707) answered the questionnaire. In  
10 2010, a total of 25,167 of those who answered the baseline questionnaire also answered a  
11 follow-up questionnaire, and members of this group constitute Stockholm Public Health  
12 Cohort 06/10 (SPHC 06/10). For the purpose of the current study, those aged 61 years and  
13 under at baseline in SPHC 06/10 were included in order to limit the study to people of  
14 working age, given that the follow-up time was four years and the official retirement age in  
15 Sweden is 65. Those with missing data on the questions on high job demands, low job  
16 control, and sleep were excluded from the cohort (n = 1,212). In addition, those who reported  
17 no NSAP or more frequent than occasional at baseline were excluded (n = 3,789; Fig 1).  
18 Thus, the study population comprised people who reported occasional NSAP at baseline (n =  
19 6,979). Occasional pain was indicated if participants responded to the question “During the  
20 previous six months, have you experienced pain in neck, shoulder and/or arms?” with either  
21 “Yes, a couple of days in the last six months” or “Yes, a couple of days each month.”

22  
23 *Insert Fig 1 about here*

1  
2  
3 **Figure 1** Flowchart of inclusion process  
4

5  
6 **Questionnaires**  
7

8 Baseline data included questions regarding demographic characteristics, physical and  
9 psychological health, physical and psychosocial work environment, lifestyle factors,  
10 socioeconomics, social relations, and sick leave. These questions were included in the 2006  
11 survey, as reported elsewhere.[27]  
12  
13  
14  
15  
16

17  
18  
19 The potential prognostic factors of interest in this study were self-reported combinations of  
20 job demands and job control (job strain, active and passive job) and sleep disturbances — all  
21 reported at baseline.  
22  
23  
24

25  
26  
27  
28 *The Job strain model*  
29

30 Job demands and job control were categorized according to the job strain model and analysed  
31 as follows: (i) low strain (low job demands and high job control), (ii) active job (high job  
32 demands and high job control), (iii) passive job (low job demands and low job control) and  
33 (iiii) job strain (high job demands and low job control) (Fig 2).  
34  
35  
36  
37  
38

39 Four questions in the baseline questionnaire were used for this purpose; two questions about  
40 job demands and two about job control. The original instrument Job Content Questionnaire  
41 (JQC) has five items on job demand and nine on job control.[28-29]The use of a partial scale  
42 compared to a complete, multi-item job-demands-and-control instrument has been reported to  
43 be feasible, exhibiting high correlations to a complete instrument (Pearson's correlation  
44 coefficient,  $r = 0.76-0.88$ ); in addition, it has also been determined that such a partial  
45 instrument assesses the same underlying concepts as the complete instrument.[30] To test the  
46 internal consistency of the four questions used for job strain in the current study, Cronbach's  
47  
48  
49  
50  
51  
52  
53  
54  
55  
56  
57  
58  
59  
60



1 alpha was calculated for job demands ( $\alpha = 0.53$ ) and job control ( $\alpha = 0.77$ ).

2  
3 The two questions used to measure job demands were:

4 (a) “Do you have enough time to complete your assignments at work?” The answers were  
5 dichotomized into yes (yes, usually/always; yes, sometimes) and no (no, rarely; no, never)

6 (b) “Are there contradictory demands involved in your job?” The answers were dichotomized  
7 into yes (yes, usually/always; yes, sometimes) and no (no, rarely; no, never).

8  
9 The two questions used to measure job control were:

10 (c) “Are you free to decide what needs to be done at work?” The answers were dichotomized  
11 into yes (yes, usually/always; yes, sometimes) and no (no, rarely; no, never).

12 (d) “Are you free to decide how your work is to be carried out?” The answers were  
13 dichotomized into yes (yes, usually/always; yes, sometimes) and no (no, rarely; no, never).

14  
15 Persons with an active job situation had a combination of high job demands (question a=no,  
16 b=yes) and high job control (question c=yes, d=yes). Those with a passive job situation a  
17 combination of low job demands (question a=yes, b=no) and low job control (question c=no,  
18 d=no) and persons with job strain a combination of high job demands( question a=no, b=yes)  
19 and low control (question c=no, d=no)

20  
21 *Insert fig 2 about here*

22  
23 **Figure 2** The job strain model [14]

24  
25 *Sleep disturbances*

1  
2  
3 1 Sleep disturbances were assessed with the question “Do you have difficulty sleeping?” The  
4  
5 2 response options were no; yes, somewhat (classified as mild sleep disturbances); and yes,  
6  
7 3 severe (classified as severe sleep disturbances). The question has been included in the  
8  
9 4 Stockholm Public Health surveys since 2002 in order to longitudinally determine the  
10  
11 5 prevalence of such disturbances among the population.[31]  
12  
13  
14  
15  
16  
17

### 17 **Outcome**

18  
19 8 The outcome of troublesome neck/shoulder/arm pain (NSAP) was based on two questions in  
20  
21 9 the follow-up survey, conducted in 2010. Participants who answered “yes” to both of the  
22  
23 10 following questions were defined as experiencing troublesome NSAP: “During the last six  
24  
25 11 months, have you felt pain in your neck or upper back and/or shoulder or arms? If so, have  
26  
27 12 these restricted your work capacity or hindered you in daily activities to some degree or to a  
28  
29 13 high degree?”  
30  
31  
32  
33  
34

### 35 **Potential confounders**

36  
37 16 Potential confounders were chosen from the baseline survey and guided by knowledge from  
38  
39 17 prior research, as well as by clinical considerations.[7 32] The potential confounders were age  
40  
41 18 (continuous and five categories), smoking habits (daily/not daily), alcohol consumption (at  
42  
43 19 least one glass of alcohol during a period of 12 months (yes/no), back pain the previous six  
44  
45 20 months (no pain, two days in total, on average two days per month, two days per week, every  
46  
47 21 day), socioeconomic class (unskilled and semiskilled worker, skilled worker, assistant non  
48  
49 22 manual employee, employed/self-employed/professional), support at work from superior  
50  
51 23 (yes/no), support at work from colleagues (yes/no), main physical workload in the past 12  
52  
53 24 months (sedentary, light, moderate, heavy), time spent on household work per day (almost no  
54  
55  
56  
57  
58  
59  
60

1 time, approx. 30 minutes, 1–2 hours, 3–5 hours, > 5 hours), economic stress based on the  
2 question “Did it happen that during the past 12 months you ran out of salary/money and had  
3 to borrow from relatives or friends in order to pay for food or rent?” (yes/no), country of birth  
4 (Sweden, elsewhere), and leisure physical activity level (sedentary, < 2 hours); (Table 1).

## 6 **Statistical analyses**

7 Numbers and proportions (%) for the variables were used to describe the baseline  
8 characteristics. Logistic regression models were used to assess associations between the  
9 prognostic factors and the outcome. Results are presented as odds ratios (OR), along with  
10 95% confidence intervals (95% CI).

11  
12 Crude associations between (i) active job (high job demands/ control) (ii) passive job (low job  
13 control/ demands) and (iii) job strain, as discrete factors on one hand, and troublesome NSAP,  
14 on the other, were calculated. Low strain (high job control/ low job demands) served as the  
15 reference category. We also calculated crude associations between sleep disturbances (mild,  
16 severe, and none) and troublesome NSAP.

17  
18 Two regression models were built for the analyses: one with the four levels of job strain -  
19 (low strain, active job, passive job, and job strain) - and one with the three levels of sleep  
20 disturbances (none, mild, severe). For each of the two regression models, potential  
21 confounding factors were added to the crude regression model, one at a time. If a factor  
22 changed the crude OR by 10% or more, it was considered a confounder and was entered into  
23 the final model, in accordance with Rothman et al.[33] Finally, we stratified the analyses on  
24 the categories of job strain and troublesome NSAP by sleep disturbances/no sleep

1  
2  
3 1 disturbances in a crude and adjusted model in order to study whether the effect of job strain  
4  
5 2 was modified by sleep disturbances.  
6  
7 3

8  
9  
10 4 The final adjusted model for the exposures active job, passive job and job strain included the  
11  
12 5 confounders' socioeconomic class, work load and support at work from one's superior. In the  
13  
14 6 final adjusted model for sleep disturbances, we included economic stress. .

15  
16 7 Statistical analyses were run using STATA® statistical software system version 11. This  
17  
18 8 study was approved by the Regional Ethical Review Board in Stockholm, Sweden (Diary nr.  
19  
20 9 2013/497-32).  
21  
22 10

## 23 24 25 11 **RESULTS**

26  
27 12 The characteristics of the study population who experience occasional NSAP (n = 6,979)  
28  
29 13 stratified by the categories of the job strain model at baseline are presented in Table 1. Sixty-  
30  
31 14 one percent (n = 4,260) of the cohort was women, and 57% (n = 4,006) fell within the age  
32  
33 15 span 18–44 years. Of the cohort, 1,003 people (14%) reported an active job situation at  
34  
35 16 baseline in 2006, 518 (7%) reported a passive job situation and 100 (2%) reported job strain.  
36  
37 17 In total, 2,137 (31%) reported severe sleep disturbances at baseline. Twenty-four percent (n =  
38  
39 18 1,659) of the cohort reported troublesome NSAP at follow-up (2010).  
40  
41  
42  
43  
44

45 20 We found that job strain and an active job situation at baseline were independently associated  
46  
47 21 with reporting troublesome NSAP at follow-up (Table 2). The adjusted analyses showed an  
48  
49 22 OR of 1.3 (95% CI 1.1–1.5) for active job, 1.2 (95% CI 0.9–1.4) for passive job, and 1.5 (95%  
50  
51 23 CI 1.0–2.4) for job strain, compared to the reference category low strain.  
52  
53  
54  
55  
56  
57  
58  
59  
60

1 Sleep disturbances at baseline were associated with troublesome NSAP at follow-up (Table  
2). The adjusted analysis yielded an OR of 1.4 (95% CI 1.3–1.6) for mild sleep disturbances  
and an OR of 2.2 (95% CI 1.6–3.0) for severe sleep disturbances, compared to the reference  
category no sleep disturbances.

6 *Insert Table 2 here*

8 Table 3 shows the results of the stratified analysis. In the stratum *no* sleep disturbances, the  
adjusted ORs for the association between active and passive job at baseline and troublesome  
NSAP at follow-up were 1.1 (95% CI 0.9–1.4) and 1.2 (95% CI 0.9–1.6), respectively and for  
job strain: OR 1.2 (95% CI 0.6–2.1). For the stratum sleep disturbances, the adjusted ORs  
between active and passive job at baseline and troublesome NSAP at follow-up were 1.3  
(95% CI 1.0–1.7) and 1.0 (95% CI 0.7–1.5), respectively. The OR for job strain was 1.8 (95%  
CI 1.0–3.5).

16 *Insert Table 3 here*

## 18 DISCUSSION

19 The results of the current study indicate that an active job situation (high job  
demands/control) and job strain, as well as sleep disturbances, are all important risk factors  
for developing troublesome neck/shoulder/ arm pain (NSAP) for individuals of the general  
working-age population who experience occasional NSAP at baseline. Further, sleep  
disturbances seem to modify the prognostic effect of an active job situation and job strain. As

1  
2  
3 1 sleep disturbances and NSAP are common complaints in society, the findings of the current  
4  
5 2 study are important from a public-health perspective.  
6  
7 3

8  
9 4 The study population included individuals who reported occasional NSAP at baseline, of  
10  
11 5 whom, some subsequently developed troublesome pain. Such a prognostic approach in  
12  
13 6 longitudinal studies of the general population is, to date, scarce.[22] Job strain is a critical  
14  
15 7 psychosocial work-related factor in the development of harmful work stress and is associated  
16  
17 8 with the risk of several disorders.[17 34-35] However, not all studies recognize job strain as a  
18  
19 9 prognostic factor for NSAP.[9 22 26] The discrepancy may owe to sources of bias, different  
20  
21 10 study designs, or varied study populations, but results may also depend on each case's  
22  
23 11 definition of neck/shoulder pain.[22]  
24  
25 12

26  
27  
28  
29 13 Sleep is considered vital to the recovery of body and mind and has been linked to a state of  
30  
31 14 altered metabolism—changes that, in turn may be linked to conditions such as diabetes and  
32  
33 15 cardiovascular disease.[36-37] In addition, the metabolic changes that result from sleep  
34  
35 16 disturbance are similar to those seen in relation to stress.[36-37] The present study suggests  
36  
37 17 that sleep disturbances act as an effect measure modifier between the prognosis of  
38  
39 18 troublesome NSAP and the impact of job strain. However, Canivet et al. investigated sleep  
40  
41 19 disturbances as a possible mediating factor in the pathway between job strain and chronic  
42  
43 20 musculoskeletal pain but found that no such association was present.[12] A recent literature  
44  
45 21 review [25] concludes that strong evidence associates especially high demands at work (active  
46  
47 22 job) with severe sleep disturbances. The modifying effect of sleep disturbances in the present  
48  
49 23 study may have different explanations, but since we cannot be sure of the temporality between  
50  
51 24 the onsets of job strain and sleep disturbances, we can only speculate on the associations. It  
52  
53 25 may be that sleep disturbance is a confounder as well as an effect measure modifier.  
54  
55  
56  
57  
58  
59  
60

1  
2  
3 1 Furthermore it may be that sleep disturbance is a mediator in the causal pathway between job  
4  
5 2 strain and troublesome NSAP. If a biological interaction is present, the risk of developing  
6  
7 3 troublesome NSAP for a person who experiences both job strain and sleeping disturbances  
8  
9 4 may be higher than the sum of the effects of the two exposures.  
10  
11  
12 5

### 14 **Strengths and limitations of the study**

16 7 The strength of the current study lies in its prospective design based on a general population  
17  
18 8 of working age and in that prognostic factors were assessed prior to the outcome. A further  
19  
20 9 strength is the complete study sample; moreover, several potential confounders were taken  
21  
22 10 into account, even though we cannot rule out the risk of unmeasured or residual confounding.  
23  
24  
25 11

27 12 We used job strain to assess work-related stress, which is a well-recognized model.[14] [15]  
28  
29 13 A frequently used questionnaire developed to measure the construct job strain is the Job  
30  
31 14 Content Questionnaire (JCQ), [28] which comprises five items addressing job demands and  
32  
33 15 nine addressing control. In Stockholm Public Health Cohort 06/10, on which the current study  
34  
35 16 is based, four items from the JCQ were used. Using four items to measure the constructs was  
36  
37 17 judged feasible based on a study that reported a consistent high agreement between partial  
38  
39 18 scales measuring job strain and a complete survey.[30] A potential limitation of our study is  
40  
41 19 that the lower sensitivity of a shorter scale may result in an increased risk of non-differential  
42  
43 20 misclassification of exposure (i.e., in this case, the prognostic factors, resulting in a dilution of  
44  
45 21 the true effect). However, the sensitivity of the shorter scales was reported to be high ( $r >$   
46  
47 22 0.94). [30] In addition, low sensitivity of the exposure measure is mainly a problem when the  
48  
49 23 exposure is common, and this is not the case with job strain.  
50  
51  
52  
53  
54  
55  
56  
57  
58  
59  
60

1  
2  
3 1 Exposure to sleep disturbances was relatively common (31%) in our study. Sleep disturbances  
4  
5 2 were investigated with a single question in the current study; the single question may lead to a  
6  
7 3 misclassification of this exposure. However, we have no reason to believe that that such a  
8  
9 4 misclassification should be differential and no reason to believe that, if it is, this would lead to  
10  
11 5 a dilution of a true effect.  
12

13  
14  
15  
16 7 We used logistic regression for the analyses of the associations in this study. Since the  
17  
18 8 outcome (i.e., troublesome NSAP) is relatively common, the calculated OR is probably higher  
19  
20 9 than a corresponding relative risk (RR), and the results should not be interpreted as such. We  
21  
22 10 have no information about the duration of the exposures prior to baseline or about the  
23  
24 11 presence of the exposures during the four-year follow-up period. This may limit the  
25  
26 12 interpretation of the results.  
27  
28  
29

30  
31  
32 14 Selection bias is a potential threat to validity and may be present if the loss to follow-up  
33  
34 15 differs among participants exposed and unexposed *and* if the loss to follow-up is also related  
35  
36 16 to the outcome. [33]Additional analyses showed that the proportion of those exposed to job  
37  
38 17 strain and sleeping disturbances differed only marginally between those who completed the  
39  
40 18 follow-up and those who did not. Accordingly, selection bias may not be a problem in this  
41  
42 19 study.  
43  
44  
45

46  
47 21 Job strain may be one of several important psychosocial factors that influence various  
48  
49 22 disorders and distress — among others, troublesome NSAP. In addition it is recently reported  
50  
51 23 that there seem to be an association between stress-related factors—such as high job demands  
52  
53 24 and job strain — and an overall unhealthy lifestyle.[17] In summary, our results indicate that  
54  
55 25 job strain and sleep disturbances may have an impact on the risk that occasional NSAP will  
56  
57  
58  
59  
60



1  
2  
3 1 develop into troublesome. It is important for employers and caregivers to take both reported  
4  
5 2 job strain and sleep disturbances into account when implementing measures meant to  
6  
7 3 minimize the risk of troublesome NSAP in workers. Still, additional large prospective studies  
8  
9 4 are needed to confirm the results of our study and also to identify other modifiable prognostic  
10  
11 5 factors for this public-health problem.  
12  
13  
14 6

## 16 7 **CONCLUSION**

18 8 Job strain, an active job situation and sleep disturbances are all independent prognostic factors  
19  
20 9 that should be taken into account when implementing preventive measures meant to minimize  
21  
22 10 the risk of troublesome neck/shoulder/arm pain among individuals of the general working-age  
23  
24 11 population. Further, we suggest that sleep disturbances is an effect measure modifier in the  
25  
26 12 association between job strain and troublesome neck/shoulder/arm pain.  
27  
28  
29

## 30 13 **Acknowledgements**

### 32 14 *Funding*

33  
34  
35  
36 15 The Stockholm Public Health Cohort was financed by the Stockholm County Council. All authors  
37  
38 16 declare that they have no conflict of interest in connection with this paper. Financial support for the  
39  
40 17 study was obtained from the AFA Insurance postdoc scholarship.  
41  
42  
43

### 44 18 45 19 **License for Publication**

46 20 The Corresponding Author has the right to grant on behalf of all authors and does grant on  
47  
48 21 behalf of all authors, an exclusive license (or non exclusive for government employees) on a  
49  
50 22 worldwide basis to the BMJ Publishing Group Ltd to permit this article (if accepted) to be  
51  
52 23 published in any BMJ PGL products and sublicenses' such use and exploit all subsidiary  
53  
54 24 rights, as set out in our license ([http://group.bmj.com/products/journals/instructions-for-](http://group.bmj.com/products/journals/instructions-for-authors/licence-forms)  
55  
56 25 [authors/licence-forms](http://group.bmj.com/products/journals/instructions-for-authors/licence-forms)).  
57  
58  
59  
60

1  
2  
3 1 Competing Interest: None declared.  
4  
5 2  
6  
7

8 3 **Contributors' statement**

9  
10 4 All authors contributed to the design of the study and to the interpretation of the results. ERB  
11 and ES conducted the statistical analyses. ERB wrote the first version of the manuscript. All  
12 the authors critically revised different versions of the manuscript. All authors read the final  
13 version of the manuscript.  
14  
15  
16  
17 7

18  
19 8 **Data sharing statement**

20 9 No additional data available  
21  
22  
23

24 10 **REFERENCES**

- 25 11 1. Picavet HS, Hazes JM. Prevalence of self reported musculoskeletal diseases is high. *Ann Rheum Dis*  
26 12 2003;**62**(7):644-50  
27 13 2. Feveile H, Jensen C, Burr H. Risk factors for neck-shoulder and wrist-hand symptoms in a 5-year  
28 14 follow-up study of 3,990 employees in Denmark. *Int Arch Occup Environ Health*  
29 15 2002;**75**(4):243-51 doi: 10.1007/s00420-001-0298-9[published Online First: Epub Date]].  
30 16 3. Cassou B, Derriennic F, Monfort C, Norton J, Touranchet A. Chronic neck and shoulder pain, age,  
31 17 and working conditions: longitudinal results from a large random sample in France. *Occup*  
32 18 *Environ Med* 2002;**59**(8):537-44  
33 19 4. Skillgate E, Magnusson C, Lundberg M, Hallqvist J. The age- and sex-specific occurrence of  
34 20 bothersome neck pain in the general population - results from the Stockholm public health  
35 21 cohort. *BMC Musculoskelet Disord* 2012;**13**(1):185 doi: 1471-2474-13-185 [pii]  
36 22 10.1186/1471-2474-13-185[published Online First: Epub Date]].  
37 23 5. Guzman J, Hurwitz EL, Carroll LJ, et al. A new conceptual model of neck pain: linking onset, course,  
38 24 and care: the Bone and Joint Decade 2000-2010 Task Force on Neck Pain and Its Associated  
39 25 Disorders. *Spine (Phila Pa 1976)* 2008;**33**(4 Suppl):S14-23 doi:  
40 26 10.1097/BRS.0b013e3181643efb  
41 27 00007632-200802151-00006 [pii][published Online First: Epub Date]].  
42 28 6. Carroll LJ, Hogg-Johnson S, van der Velde G, et al. Course and prognostic factors for neck pain in  
43 29 the general population: results of the Bone and Joint Decade 2000-2010 Task Force on Neck  
44 30 Pain and Its Associated Disorders. *Spine (Phila Pa 1976)* 2008;**33**(4 Suppl):S75-82 doi:  
45 31 10.1097/BRS.0b013e31816445be  
46 32 00007632-200802151-00012 [pii][published Online First: Epub Date]].  
47 33 7. Carroll LJ, Hogg-Johnson S, Cote P, et al. Course and prognostic factors for neck pain in workers:  
48 34 results of the Bone and Joint Decade 2000-2010 Task Force on Neck Pain and Its Associated  
49 35 Disorders. *Spine (Phila Pa 1976)* 2008;**33**(4 Suppl):S93-100 doi:  
50 36 10.1097/BRS.0b013e31816445d4  
51 37 00007632-200802151-00014 [pii][published Online First: Epub Date]].  
52 38 8. Haldeman S, Carroll LJ, Cassidy JD. The empowerment of people with neck pain: introduction: the  
53 39 Bone and Joint Decade 2000-2010 Task Force on Neck Pain and Its Associated Disorders.  
54 40 *Spine (Phila Pa 1976)* 2008;**33**(4 Suppl):S8-S13 doi: 10.1097/BRS.0b013e3181643f51  
55  
56  
57  
58  
59  
60

- 1  
2  
3 1 00007632-200802151-00005 [pii][published Online First: Epub Date]].  
4 2 9. Grooten WJ, Mulder M, Josephson M, Alfredsson L, Wiktorin C. The influence of work-related  
5 3 exposures on the prognosis of neck/shoulder pain. *Eur Spine J* 2007;**16**(12):2083-91 doi:  
6 4 10.1007/s00586-007-0481-0[published Online First: Epub Date]].  
7 5 10. Palmlof L, Skillgate E, Alfredsson L, et al. Does income matter for troublesome neck pain? A  
8 6 population-based study on risk and prognosis. *J Epidemiol Community Health*  
9 7 2012;**66**(11):1063-70 doi: jech-2011-200783 [pii]  
10 8 10.1136/jech-2011-200783[published Online First: Epub Date]].  
11 9 11. Cote P, van der Velde G, Cassidy JD, et al. The burden and determinants of neck pain in workers:  
12 10 results of the Bone and Joint Decade 2000-2010 Task Force on Neck Pain and Its Associated  
13 11 Disorders. *Spine (Phila Pa 1976)* 2008;**33**(4 Suppl):S60-74 doi:  
14 12 10.1097/BRS.0b013e3181643ee4  
15 13 00007632-200802151-00011 [pii][published Online First: Epub Date]].  
16 14 12. Canivet C, Ostergren PO, Choi B, et al. Sleeping problems as a risk factor for subsequent  
17 15 musculoskeletal pain and the role of job strain: results from a one-year follow-up of the  
18 16 Malmo Shoulder Neck Study Cohort. *Int J Behav Med* 2008;**15**(4):254-62 doi: 905440510 [pii]  
19 17 10.1080/10705500802365466[published Online First: Epub Date]].  
20 18 13. Ostergren PO, Hanson BS, Balogh I, et al. Incidence of shoulder and neck pain in a working  
21 19 population: effect modification between mechanical and psychosocial exposures at work?  
22 20 Results from a one year follow up of the Malmo shoulder and neck study cohort. *J Epidemiol*  
23 21 *Community Health* 2005;**59**(9):721-8 doi: 59/9/721 [pii]  
24 22 10.1136/jech.2005.034801[published Online First: Epub Date]].  
25 23 14. Theorell T, Karasek RA. Current issues relating to psychosocial job strain and cardiovascular  
26 24 disease research. *J Occup Health Psychol* 1996;**1**(1):9-26  
27 25 15. Karasek R. Job demands, job decision latitude, and mental strain: Implications for job redesign.  
28 26 *Adm Sci. Q.* 1979(24):285-307  
29 27 16. Lindeberg SI, Rosvall M, Choi B, et al. Psychosocial working conditions and exhaustion in a  
30 28 working population sample of Swedish middle-aged men and women. *Eur J Public Health*  
31 29 2011;**21**(2):190-6 doi: ckq039 [pii]  
32 30 10.1093/eurpub/ckq039[published Online First: Epub Date]].  
33 31 17. Heikkila K, Fransson EI, Nyberg ST, et al. Job Strain and Health-Related Lifestyle: Findings From an  
34 32 Individual-Participant Meta-Analysis of 118 000 Working Adults. *Am J Public Health* 2013 doi:  
35 33 10.2105/AJPH.2012.301090[published Online First: Epub Date]].  
36 34 18. Karasek R, Baker D, Marxer F, Ahlbom A, Theorell T. Job decision latitude, job demands, and  
37 35 cardiovascular disease: a prospective study of Swedish men. *Am J Public Health*  
38 36 1981;**71**(7):694-705  
39 37 19. Harcombe H, McBride D, Derrett S, Gray A. Prevalence and impact of musculoskeletal disorders in  
40 38 New Zealand nurses, postal workers and office workers. *Aust N Z J Public Health*  
41 39 2009;**33**(5):437-41 doi: AZPH425 [pii]  
42 40 10.1111/j.1753-6405.2009.00425.x[published Online First: Epub Date]].  
43 41 20. Andersson HI. The course of non-malignant chronic pain: a 12-year follow-up of a cohort from the  
44 42 general population. *Eur J Pain* 2004;**8**(1):47-53 doi: S1090-3801(03)00064-8 [pii]  
45 43 10.1016/S1090-3801(03)00064-8[published Online First: Epub Date]].  
46 44 21. Fredriksson K, Alfredsson L, Ahlberg G, et al. Work environment and neck and shoulder pain: the  
47 45 influence of exposure time. Results from a population based case-control study. *Occup*  
48 46 *Environ Med* 2002;**59**(3):182-8  
49 47 22. Park JK, Jang SH. Association between Upper Extremity Musculoskeletal Disorders and  
50 48 Psychosocial Factors at Work: A Review on the Job DCS Model's Perspective. *Saf Health Work*  
51 49 2010;**1**(1):37-42 doi: 10.5491/SHAW.2010.1.1.37[published Online First: Epub Date]].  
52 53  
54 55  
56  
57  
58  
59  
60

**Table 1.** Baseline socio-demographic and psychosocial characteristics in the study population of people with occasional neck, shoulder and/or arm pain (n = 6,979).

- 1 23. Kaila-Kangas L, Kivimaki M, Harma M, et al. Sleep disturbances as predictors of hospitalization for  
2 back disorders-a 28-year follow-up of industrial employees. *Spine (Phila Pa 1976)*  
3 2006;**31**(1):51-6 doi: 00007632-200601010-00012 [pii][published Online First: Epub Date]].
- 4 24. Hoogendoorn WE, Bongers PM, de Vet HC, et al. Psychosocial work characteristics and  
5 psychological strain in relation to low-back pain. *Scand J Work Environ Health*  
6 2001;**27**(4):258-67 doi: 613 [pii][published Online First: Epub Date]].
- 7 25. SBU SCoHTA. Arbetsmiljöns betydelse för sömnstörningar. ISBN 978-91-85413-57-7 ed.  
8 Stockholm, 2013.
- 9 26. Hanson LL, Akerstedt T, Naswall K, Leineweber C, Theorell T, Westerlund H. Cross-lagged  
10 relationships between workplace demands, control, support, and sleep problems. *Sleep*  
11 2011;**34**(10):1403-10 doi: 10.5665/SLEEP.1288[published Online First: Epub Date]].
- 12 27. Svensson AC, Fredlund P, Laflamme L, et al. Cohort Profile: The Stockholm Public Health Cohort.  
13 *Int J Epidemiol* 2012 doi: dys126 [pii]  
14 10.1093/ije/dys126[published Online First: Epub Date]].
- 15 28. Karasek R, Brisson C, Kawakami N, Houtman I, Bongers P, Amick B. The Job Content  
16 Questionnaire (JCQ): an instrument for internationally comparative assessments of  
17 psychosocial job characteristics. *J Occup Health Psychol* 1998;**3**(4):322-55
- 18 29. Job Content Questionnaire Rf. (<http://www.jcqccenter.org>)
- 19 30. Fransson EI, Nyberg ST, Heikkila K, et al. Comparison of alternative versions of the job demand-  
20 control scales in 17 European cohort studies: the IPD-Work consortium. *BMC Public Health*  
21 2012;**12**:62 doi: 1471-2458-12-62 [pii]  
22 10.1186/1471-2458-12-62[published Online First: Epub Date]].
- 23 31. Folkhälsoinstitut S. Aim and background of questions included in The Swedish Public Health  
24 Cohort. ISSN: 1653-0802 2011
- 25 32. Hogg-Johnson S, van der Velde G, Carroll LJ, et al. The burden and determinants of neck pain in  
26 the general population: results of the Bone and Joint Decade 2000-2010 Task Force on Neck  
27 Pain and Its Associated Disorders. *J Manipulative Physiol Ther* 2009;**32**(2 Suppl):S46-60 doi:  
28 S0161-4754(08)00337-0 [pii]  
29 10.1016/j.jmpt.2008.11.010[published Online First: Epub Date]].
- 30 33. Rothman KJ, Greenland, S. *Introduction to stratified analysis*. 3rd edn ed. Philadelphia: Wolters  
31 Kluwer Health/Lippincott Williams&Williams, 2008.
- 32 34. Heraclides A, Chandola T, Witte DR, Brunner EJ. Psychosocial stress at work doubles the risk of  
33 type 2 diabetes in middle-aged women: evidence from the Whitehall II study. *Diabetes Care*  
34 2009;**32**(12):2230-5 doi: dc09-0132 [pii]  
35 10.2337/dc09-0132[published Online First: Epub Date]].
- 36 35. Laszlo KD, Ahnve S, Hallqvist J, Ahlbom A, Janszky I. Job strain predicts recurrent events after a  
37 first acute myocardial infarction: the Stockholm Heart Epidemiology Program. *J Intern Med*  
38 2010;**267**(6):599-611 doi: JIM2196 [pii]  
39 10.1111/j.1365-2796.2009.02196.x[published Online First: Epub Date]].
- 40 36. Westerlund H, Alexanderson K, Akerstedt T, Magnusson Hanson L, Theorell T, Kivimaki M. Work-  
41 related sleep disturbances and sickness absence in the Swedish working population, 1993-  
42 1999. *Sleep* 2008;**31**(8):1169-77
- 43 37. Akerstedt T, Nilsson PM. Sleep as restitution: an introduction. *J Intern Med* 2003;**254**(1):6-12 doi:  
44 1195 [pii][published Online First: Epub Date]].

|                                                               | Low strain  |           | Active job  |           | Passive job |           | Job strain |           |
|---------------------------------------------------------------|-------------|-----------|-------------|-----------|-------------|-----------|------------|-----------|
|                                                               | (n = 5,358) |           | (n = 1,003) |           | (n = 518)   |           | (n = 100)  |           |
|                                                               | n           | %         | N           | %         | n           | %         | n          | %         |
| <b>Age</b>                                                    |             |           |             |           |             |           |            |           |
| 18–44                                                         | 2,981       | <b>56</b> | 613         | <b>61</b> | 348         | <b>67</b> | 64         | <b>64</b> |
| 45–61                                                         | 2,377       | <b>44</b> | 390         | <b>39</b> | 170         | <b>33</b> | 36         | <b>36</b> |
| <b>Gender</b>                                                 |             |           |             |           |             |           |            |           |
| Men                                                           | 2,145       | <b>40</b> | 384         | <b>38</b> | 158         | <b>30</b> | 32         | <b>32</b> |
| Women                                                         | 3,213       | <b>60</b> | 619         | <b>62</b> | 360         | <b>70</b> | 68         | <b>68</b> |
| <b>Country of birth</b>                                       |             |           |             |           |             |           |            |           |
| Sweden                                                        | 4,600       | <b>86</b> | 899         | <b>90</b> | 404         | <b>78</b> | 83         | <b>83</b> |
| Elsewhere                                                     | 758         | <b>14</b> | 104         | <b>10</b> | 114         | <b>22</b> | 17         | <b>17</b> |
| <b>Socioeconomic class*</b>                                   |             |           |             |           |             |           |            |           |
| Unskilled and semiskilled workers                             | 656         | <b>13</b> | 64          | <b>7</b>  | 162         | <b>34</b> | 33         | <b>35</b> |
| Skilled workers                                               | 611         | <b>12</b> | 62          | <b>6</b>  | 76          | <b>16</b> | 11         | <b>11</b> |
| Assistant non-manual employees                                | 778         | <b>15</b> | 107         | <b>11</b> | 108         | <b>23</b> | 12         | <b>12</b> |
| Intermediate non-manual employees                             | 1,358       | <b>26</b> | 321         | <b>33</b> | 90          | <b>19</b> | 24         | <b>24</b> |
| Employed/self-employed professionals, servants and executives | 1,265       | <b>24</b> | 331         | <b>34</b> | 29          | <b>6</b>  | 10         | <b>10</b> |
| Self-employed (other than professionals)                      | 492         | <b>10</b> | 84          | <b>9</b>  | 8           | <b>2</b>  | 4          | <b>4</b>  |
| <b>Sleep disturbances</b>                                     |             |           |             |           |             |           |            |           |
| None or mild                                                  | 3,861       | <b>72</b> | 601         | <b>60</b> | 326         | <b>63</b> | 54         | <b>54</b> |
| Severe                                                        | 1,497       | <b>28</b> | 402         | <b>40</b> | 192         | <b>37</b> | 46         | <b>46</b> |
| <b>Work load</b>                                              |             |           |             |           |             |           |            |           |
| Sedentary                                                     | 2,207       | <b>41</b> | 464         | <b>46</b> | 192         | <b>37</b> | 36         | <b>36</b> |
| Light, low                                                    | 1,572       | <b>29</b> | 272         | <b>27</b> | 119         | <b>23</b> | 18         | <b>18</b> |
| Moderately heavy                                              | 1,156       | <b>22</b> | 192         | <b>19</b> | 149         | <b>29</b> | 18         | <b>18</b> |
| Heavy                                                         | 409         | <b>8</b>  | 74          | <b>7</b>  | 56          | <b>11</b> | 27         | <b>27</b> |

|                                                       |       |           |     |           |     |           |    |           |
|-------------------------------------------------------|-------|-----------|-----|-----------|-----|-----------|----|-----------|
| <b>Low support at work from superior</b>              | 458   | <b>18</b> | 321 | <b>32</b> | 183 | <b>35</b> | 69 | <b>69</b> |
| <b>Low support at work from colleagues</b>            | 622   | <b>9</b>  | 150 | <b>15</b> | 71  | <b>14</b> | 20 | <b>20</b> |
| <b>Economic stress (yes) <input type="checkbox"/></b> | 367   | <b>7</b>  | 77  | <b>8</b>  | 73  | <b>14</b> | 16 | <b>16</b> |
| <b>Household work</b>                                 |       |           |     |           |     |           |    |           |
| >10 hr/week                                           | 2,135 | <b>40</b> | 456 | <b>45</b> | 183 | <b>36</b> | 39 | <b>39</b> |
| <b>Co-morbidity LBP</b>                               |       |           |     |           |     |           |    |           |
| Yes, a few days per month or more often               | 3,318 | <b>62</b> | 648 | <b>65</b> | 345 | <b>67</b> | 67 | <b>67</b> |
| <b>Daily smoker (yes)</b>                             | 702   | <b>13</b> | 121 | <b>12</b> | 79  | <b>15</b> | 13 | <b>13</b> |
| <b>Alcohol (yes, sometime during last 12 months)</b>  | 4,945 | <b>93</b> | 949 | <b>95</b> | 458 | <b>89</b> | 87 | <b>87</b> |
| <b>Leisure physical activity level</b>                |       |           |     |           |     |           |    |           |
| Sedentary < 2hr/week                                  | 477   | <b>9</b>  | 102 | <b>10</b> | 83  | <b>16</b> | 18 | <b>18</b> |
| Active ≥2 hr/week                                     | 4,877 | <b>91</b> | 895 | <b>89</b> | 432 | <b>84</b> | 81 | <b>81</b> |

\*Socioeconomic class: Based on occupation and education  Economic stress ("Did it happen that during the past 12 months you ran out of salary/money and had to borrow from relatives and friends in order to pay for food or rent?")

1  
2  
3  
4  
5  
6  
7

**Table 2.** The associations between an active job (high job demands/control) and passive job (low job control/demands), job strain and sleep disturbances on the risk of developing troublesome neck/shoulder/arm pain presented as crude and adjusted odds ratios (OR) and 95% confidence intervals (95% CI).

| <b>Exposure</b>                        | <b>No.exp.<br/>Cases<br/>(total)</b> | <b>Crude<br/>OR (95% CI)</b> | <b>P</b> | <b>Adjusted<br/>OR (95% CI)</b> | <b>p</b> |
|----------------------------------------|--------------------------------------|------------------------------|----------|---------------------------------|----------|
| Low strain<br>(reference)              | 1,219<br>(4,023)                     | 1                            | -        | 1                               | -        |
| Active job                             | 257<br>(725)                         | 1.2<br>(1.0–1.4)             | 0.05     | 1.3*<br>(1.1–1.5)               | 0.006    |
| Passive job                            | 145<br>(356)                         | 1.3<br>(1.1–1.6)             | 0.004    | 1.2*<br>(0.9–1.4)               | 0.2      |
| Job strain                             | 38<br>(62)                           | 2.0<br>(1.3–3.0)             | 0.001    | 1.5*<br>(1.0–2.4)               | 0.06     |
| No sleep<br>disturbance<br>(reference) | 1,035<br>(3,697)                     | 1                            |          | 1                               |          |
| Mild sleep<br>disturbance              | 547<br>(1,358)                       | 1.4<br>(1.3–1.6)             | <0.00    | 1.4 □<br>(1.3–1.6)              | <0.00    |
| Severe sleep<br>disturbance            | 77<br>(111)                          | 2.5<br>(1.8–3.3)             | <0.00    | 2.2 □<br>(1.6–3.0)              | <0.00    |

\*Adjusted for socio-economic class, work load and support from superior, □ adjusted for economic stress

1

2

3

4

5

**Table 3.** The associations between an active job (high job demands/control), passive job (low job control/demands) and job strain and troublesome neck, shoulder and/or arm pain, stratified for *no* sleep disturbances/ sleep disturbances, presented as crude and adjusted odds ratios (OR) and 95% confidence intervals (95% CI).

| Exposure                  | No sleep disturbances        |                         |                             |     | Sleep disturbances |                         |                             |      |
|---------------------------|------------------------------|-------------------------|-----------------------------|-----|--------------------|-------------------------|-----------------------------|------|
|                           | No. exp.<br>Cases<br>(total) | Crude<br>OR<br>(95% CI) | Adjusted*<br>OR<br>(95% CI) | P   | No. exp.<br>Cases  | Crude<br>OR<br>(95% CI) | Adjusted*<br>OR<br>(95% CI) | p    |
| Low strain<br>(reference) | 808<br>(3,775)               | 1                       | 1                           |     | 411<br>(1,467)     | 1                       | 1                           |      |
| Active job                | 129<br>(587)                 | 1.0<br>(0.8–1.3)        | 1.1<br>(0.9–1.4)            | 0.3 | 128<br>(395)       | 1.2<br>(1.0–1.6)        | 1.3<br>(1.0–1.7)            | 0.02 |
| Passive job               | 83<br>(316)                  | 1.3<br>(1.0–1.7)        | 1.2<br>(0.9–1.6)            | 0.2 | 62<br>(185)        | 1.3<br>(0.9–1.8)        | 1.0<br>(0.7–1.5)            | 0.9  |
| Job strain                | 15<br>(54)                   | 1.4<br>(0.8–2.6)        | 1.2<br>(0.6–2.1)            | 0.7 | 23<br>(46)         | 2.6<br>(1.4–4.6)        | 1.8<br>(1.0–3.5)            | 0.07 |

1



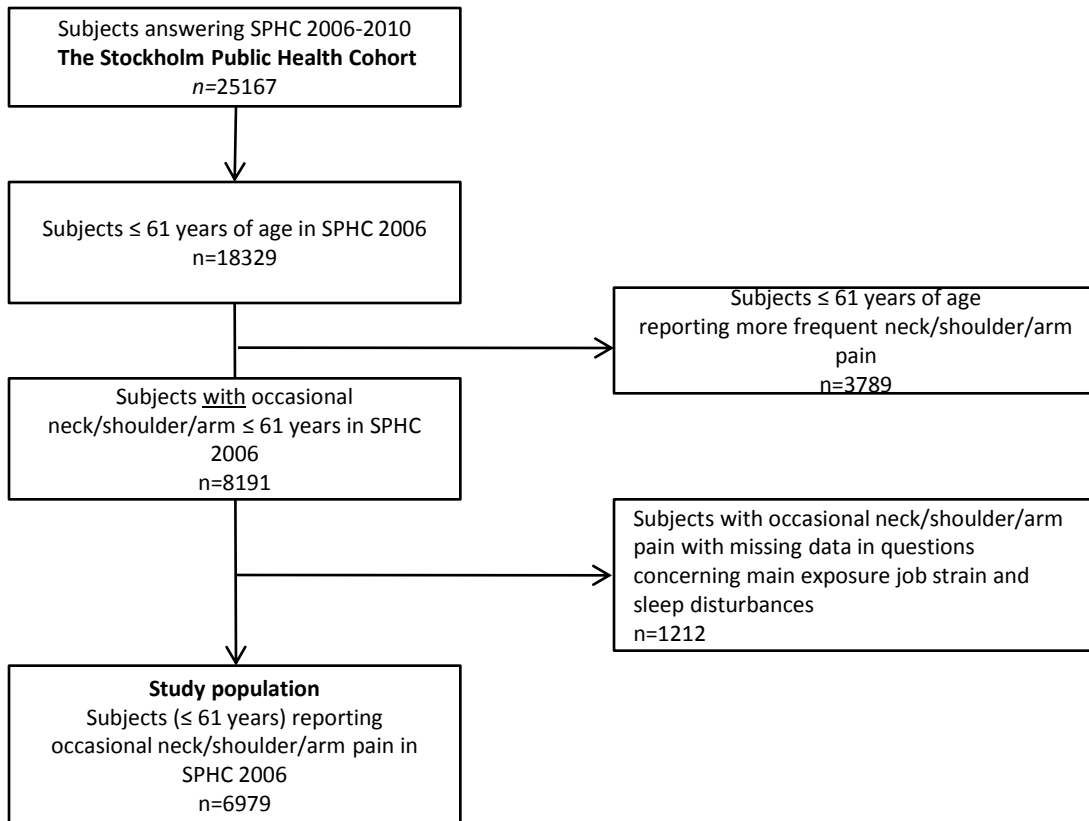

1  
2  
3  
4  
5  
6  
7  
8  
9  
10  
11  
12  
13  
14  
15  
16  
17  
18  
19  
20  
21  
22  
23  
24  
25  
26  
27  
28  
29  
30  
31  
32  
33  
34  
35  
36  
37  
38  
39  
40  
41  
42  
43

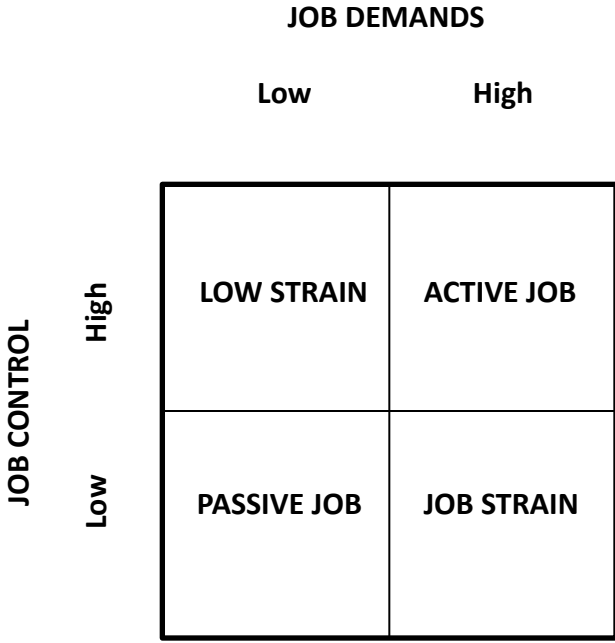

## STROBE Statement—checklist of items that should be included in reports of observational studies

|                                                                                                                                        | Item No | Recommendation                                                                                                                                                                             |
|----------------------------------------------------------------------------------------------------------------------------------------|---------|--------------------------------------------------------------------------------------------------------------------------------------------------------------------------------------------|
| <b>Title and abstract</b>                                                                                                              | 1       | (a) Indicate the study's design with a commonly used term in the title or the abstract                                                                                                     |
| a) Cohort study – in title and in abstract                                                                                             |         |                                                                                                                                                                                            |
| b) This is done in the abstract with headings                                                                                          |         | (b) Provide in the abstract an informative and balanced summary of what was done and what was found                                                                                        |
| <b>Introduction</b>                                                                                                                    |         |                                                                                                                                                                                            |
| Background/rationale                                                                                                                   | 2       | Explain the scientific background and rationale for the investigation being reported                                                                                                       |
| This is summarised in the introduction part of the manuscript. Page 2-3.                                                               |         |                                                                                                                                                                                            |
| Objectives                                                                                                                             | 3       | State specific objectives, including any prespecified hypotheses                                                                                                                           |
| The objectives are stated at page 3, line 20-25                                                                                        |         |                                                                                                                                                                                            |
| <b>Methods</b>                                                                                                                         |         |                                                                                                                                                                                            |
| Study design                                                                                                                           | 4       | Present key elements of study design early in the paper                                                                                                                                    |
| The study design is presented at the first line in the method section, Page 3, line 3-6                                                |         |                                                                                                                                                                                            |
| Setting                                                                                                                                | 5       | Describe the setting, locations, and relevant dates, including periods of recruitment, exposure, follow-up, and data collection                                                            |
| This is presented in the methods section Page 4, line 8-15                                                                             |         |                                                                                                                                                                                            |
| Participants                                                                                                                           | 6       | (a) <i>Cohort study</i> —Give the eligibility criteria, and the sources and methods of selection of participants. Describe methods of follow-up                                            |
| a) This is presented in the method section; Page 4, line 15-23 and page 5, line 1-2                                                    |         | <i>Case-control study</i> —Give the eligibility criteria, and the sources and methods of case ascertainment and control selection. Give the rationale for the choice of cases and controls |
| b) Exposed are n= 6979 and unexposed n=1212. This is presented in a flow chart. Figure 1.                                              |         | <i>Cross-sectional study</i> —Give the eligibility criteria, and the sources and methods of selection of participants                                                                      |
|                                                                                                                                        |         | (b) <i>Cohort study</i> —For matched studies, give matching criteria and number of exposed and unexposed                                                                                   |
|                                                                                                                                        |         | <i>Case-control study</i> —For matched studies, give matching criteria and the number of controls per case                                                                                 |
| Variables                                                                                                                              |         | Clearly define all outcomes, exposures, predictors, potential confounders, and effect modifiers. Give diagnostic criteria, if applicable                                                   |
| Outcomes, exposures, potential predictors, potential confounders are presented in the method section page 5, line 5 to page 8, line 37 |         |                                                                                                                                                                                            |
| Data sources/                                                                                                                          | 8       | For each variable of interest, give sources of data and                                                                                                                                    |

|                                                                                                    |                        |                                                                                                                                                                           |                                                                                                                                                                                                                                                                                                                                                                                                                                                                                                                                                                   |
|----------------------------------------------------------------------------------------------------|------------------------|---------------------------------------------------------------------------------------------------------------------------------------------------------------------------|-------------------------------------------------------------------------------------------------------------------------------------------------------------------------------------------------------------------------------------------------------------------------------------------------------------------------------------------------------------------------------------------------------------------------------------------------------------------------------------------------------------------------------------------------------------------|
| 1<br>2<br>3<br>4<br>5<br>6                                                                         | measurement            | This is presented for all outcomes, potential predictors, confounders in the method section page 5, line 5 to page 8, line3*                                              | details of methods of assessment (measurement). Describe comparability of assessment methods if there is more than one group                                                                                                                                                                                                                                                                                                                                                                                                                                      |
| 7<br>8<br>9<br>10<br>11<br>12<br>13                                                                | Bias                   | 9<br>Selection bias; page 13, line 12-17, page 14, 12-16<br>Confounding bias, page 9, line 18-21, page 13,line 8-10                                                       | Describe any efforts to address potential sources of bias                                                                                                                                                                                                                                                                                                                                                                                                                                                                                                         |
| 14<br>15<br>16                                                                                     | Study size             | 10<br>This is presented in flow-chart, Fig 1                                                                                                                              | Explain how the study size was arrived at                                                                                                                                                                                                                                                                                                                                                                                                                                                                                                                         |
| 17<br>18<br>19                                                                                     | Quantitative variables | 11<br>Page 7, line 1-14,Page 8, line 5 – Page 9, line 3                                                                                                                   | Explain how quantitative variables were handled in the analyses. If applicable, describe which groupings were chosen and why                                                                                                                                                                                                                                                                                                                                                                                                                                      |
| 20<br>21<br>22<br>23<br>24<br>25<br>26<br>27<br>28<br>29<br>30<br>31<br>32<br>33<br>34<br>35<br>36 | Statistical methods    | 12<br>a)Page 9, line 5 – Page 10, line 5<br>b) Page 9, line 21-24<br>c) Figure 1 and page 14, line 12-16<br>d) Figure 1<br>e) No sensitivity analysis was performed<br>e) | (a) Describe all statistical methods, including those used to control for confounding<br>(b) Describe any methods used to examine subgroups and interactions<br>(c) Explain how missing data were addressed<br>(d) <i>Cohort study</i> —If applicable, explain how loss to follow-up was addressed<br><i>Case-control study</i> —If applicable, explain how matching of cases and controls was addressed<br><i>Cross-sectional study</i> —If applicable, describe analytical methods taking account of sampling strategy<br>(e) Describe any sensitivity analyses |
| 37                                                                                                 | <b>Results</b>         |                                                                                                                                                                           |                                                                                                                                                                                                                                                                                                                                                                                                                                                                                                                                                                   |
| 38<br>39<br>40<br>41<br>42<br>43<br>44<br>45                                                       | Participants           | 13*<br>See flow-chart –Figure 1                                                                                                                                           | (a) Report numbers of individuals at each stage of study—eg numbers potentially eligible, examined for eligibility, confirmed eligible, included in the study, completing follow-up, and analysed<br>(b) Give reasons for non-participation at each stage<br>(c) Consider use of a flow diagram                                                                                                                                                                                                                                                                   |
| 46<br>47<br>48<br>49<br>50<br>51<br>52<br>53<br>54                                                 | Descriptive data       | 14*<br>a) b)Se table 1-3 and flow-chart Fig 1<br>c) Page 5, line 6-22                                                                                                     | (a) Give characteristics of study participants (eg demographic, clinical, social) and information on exposures and potential confounders<br>(b) Indicate number of participants with missing data for each variable of interest<br>(c) <i>Cohort study</i> —Summarise follow-up time (eg, average and total amount)                                                                                                                                                                                                                                               |
| 55<br>56<br>57<br>58<br>59<br>60                                                                   | Outcome data           | 15*<br>Page 8, line 5-10,<br>Page 10, line 12-18                                                                                                                          | <i>Cohort study</i> —Report numbers of outcome events or summary measures over time<br><i>Case-control study</i> —Report numbers in each exposure category, or summary measures of exposure                                                                                                                                                                                                                                                                                                                                                                       |

|                          |                                    |  |                                                                                                                                                                                                              |
|--------------------------|------------------------------------|--|--------------------------------------------------------------------------------------------------------------------------------------------------------------------------------------------------------------|
|                          |                                    |  | <i>Cross-sectional study</i> —Report numbers of outcome events or summary measures                                                                                                                           |
| Main results             | 16                                 |  | (a) Give unadjusted estimates and, if applicable, confounder-adjusted estimates and their precision (eg, 95% confidence interval). Make clear which confounders were adjusted for and why they were included |
|                          | Table 2 and 3                      |  | (b) Report category boundaries when continuous variables were categorized                                                                                                                                    |
|                          | Page 10, line 20 – page 11, line 5 |  | (c) If relevant, consider translating estimates of relative risk into absolute risk for a meaningful time period                                                                                             |
|                          | b) N/A                             |  |                                                                                                                                                                                                              |
|                          | c)N/A                              |  |                                                                                                                                                                                                              |
| Other analyses           | 17                                 |  | Report other analyses done—eg analyses of subgroups and interactions, and sensitivity analyses                                                                                                               |
|                          | Table 3                            |  |                                                                                                                                                                                                              |
|                          | Page 11, line 8-14                 |  |                                                                                                                                                                                                              |
| <b>Discussion</b>        |                                    |  |                                                                                                                                                                                                              |
| Key results              | 18                                 |  | Summarise key results with reference to study objectives                                                                                                                                                     |
|                          | Page 11, line 19-23                |  |                                                                                                                                                                                                              |
| Limitations              | 19                                 |  | Discuss limitations of the study, taking into account sources of potential bias or imprecision. Discuss both direction and magnitude of any potential bias                                                   |
|                          | Page 13, line7-Page 14, line 17    |  |                                                                                                                                                                                                              |
| Interpretation           | 20                                 |  | Give a cautious overall interpretation of results considering objectives, limitations, multiplicity of analyses, results from similar studies, and other relevant evidence                                   |
|                          | Page 14, line 19 – Page 14 line 3  |  |                                                                                                                                                                                                              |
|                          | Page 15, line 6-11                 |  |                                                                                                                                                                                                              |
| Generalisability         | 21                                 |  | Discuss the generalisability (external validity) of the study results                                                                                                                                        |
|                          | Page 11, line 19-23                |  |                                                                                                                                                                                                              |
|                          | Page 12, line 1-2                  |  |                                                                                                                                                                                                              |
|                          | Page 14, line 24                   |  |                                                                                                                                                                                                              |
| <b>Other information</b> |                                    |  |                                                                                                                                                                                                              |
| Funding                  | 22                                 |  | Give the source of funding and the role of the funders for the present study and, if applicable, for the original study on which the present article is based                                                |
|                          | Page 15, line 13-15                |  |                                                                                                                                                                                                              |

Continued on next page

1  
2  
3  
4 \*Give information separately for cases and controls in case-control studies and, if applicable, for exposed and  
5 unexposed groups in cohort and cross-sectional studies.  
6  
7

8 **Note:** An Explanation and Elaboration article discusses each checklist item and gives methodological background and  
9 published examples of transparent reporting. The STROBE checklist is best used in conjunction with this article (freely  
10 available on the Web sites of PLoS Medicine at <http://www.plosmedicine.org/>, Annals of Internal Medicine at  
11 <http://www.annals.org/>, and Epidemiology at <http://www.epidem.com/>). Information on the STROBE Initiative is  
12 available at [www.strobe-statement.org](http://www.strobe-statement.org).  
13  
14  
15  
16  
17  
18  
19  
20  
21  
22  
23  
24  
25  
26  
27  
28  
29  
30  
31  
32  
33  
34  
35  
36  
37  
38  
39  
40  
41  
42  
43  
44  
45  
46  
47  
48  
49  
50  
51  
52  
53  
54  
55  
56  
57  
58  
59  
60

# BMJ Open

## Are job Strain and Sleep Disturbances Prognostic Factors for Neck/Shoulder/Arm pain? A Cohort Study of a General Population of Working Age in Sweden

|                                 |                                                                                                                                                                                                                                                                                                                                                                                                                                                                                                                                                                                                                                                                                                              |
|---------------------------------|--------------------------------------------------------------------------------------------------------------------------------------------------------------------------------------------------------------------------------------------------------------------------------------------------------------------------------------------------------------------------------------------------------------------------------------------------------------------------------------------------------------------------------------------------------------------------------------------------------------------------------------------------------------------------------------------------------------|
| Journal:                        | <i>BMJ Open</i>                                                                                                                                                                                                                                                                                                                                                                                                                                                                                                                                                                                                                                                                                              |
| Manuscript ID:                  | bmjopen-2014-005103.R1                                                                                                                                                                                                                                                                                                                                                                                                                                                                                                                                                                                                                                                                                       |
| Article Type:                   | Research                                                                                                                                                                                                                                                                                                                                                                                                                                                                                                                                                                                                                                                                                                     |
| Date Submitted by the Author:   | 27-May-2014                                                                                                                                                                                                                                                                                                                                                                                                                                                                                                                                                                                                                                                                                                  |
| Complete List of Authors:       | Rasmussen-Barr, Eva; Karolinska Institutet, Institute of Environmental Medicine; Karolinska Institutet, Division of Physiotherapy, Department of Neurobiology, Caring Sciences, and Society<br>Grooten, Wilhelmus; Karolinska Institutet, Division of Physiotherapy, Department of Neurobiology, Caring Sciences, and Society<br>Hallqvist, Johan; Karolinska Universitetssjukhuset, Department of Public Health Sciences; Uppsala University, Department of Public Health and Caring Sciences<br>Holm, Lena; Karolinska Institutet, Institute of Environmental Medicine<br>Skillgate, Eva; Karolinska Institutet, Institute of Environmental Medicine; Scandinavian College of Naprapathic Manual Medicine, |
| <b>Primary Subject Heading</b>: | Epidemiology                                                                                                                                                                                                                                                                                                                                                                                                                                                                                                                                                                                                                                                                                                 |
| Secondary Subject Heading:      | Occupational and environmental medicine                                                                                                                                                                                                                                                                                                                                                                                                                                                                                                                                                                                                                                                                      |
| Keywords:                       | Musculoskeletal disorders < ORTHOPAEDIC & TRAUMA SURGERY, SLEEP MEDICINE, PREVENTIVE MEDICINE, PRIMARY CARE, REHABILITATION MEDICINE, EPIDEMIOLOGY                                                                                                                                                                                                                                                                                                                                                                                                                                                                                                                                                           |
|                                 |                                                                                                                                                                                                                                                                                                                                                                                                                                                                                                                                                                                                                                                                                                              |

SCHOLARONE™  
Manuscripts

1  
2  
3 1 Are job strain and sleep disturbances prognostic factors for neck/shoulder/arm  
4 pain? A cohort study of a general population of working age in Sweden  
5 2  
6  
7 3  
8  
9 4  
10  
11

12 **Authors:**

13 *Rasmussen-Barr E<sup>1,2</sup>, Grooten WJA<sup>2</sup>, Hallqvist J<sup>3,4</sup>, Holm LW<sup>1</sup>, Skillgate E<sup>1,5</sup>*  
14

15 <sup>1</sup>Institute of Environmental Medicine, Karolinska Institutet, Box 210, SE-17177, Stockholm,  
16 Sweden  
17

18 <sup>2</sup>Division of Physiotherapy, Department of Neurobiology, Caring Sciences, and Society,  
19 Karolinska Institutet, Huddinge, Sweden  
20

21 <sup>3</sup>Department of Public Health Sciences, Karolinska Universitetssjukhuset, SE-17176,  
22 Stockholm, Sweden  
23

24 <sup>4</sup>Department of Public Health and Caring Sciences, Uppsala University, Box 564, SE-75122,  
25 Uppsala, Sweden  
26

27 <sup>5</sup>Scandinavian College of Naprapathic Manual Medicine, Kräftriket 23A, SE-11419,  
28 Stockholm, Sweden  
29

30 **Corresponding author:**

31 Eva Rasmussen Barr  
32 Institute of Environmental Medicine, Karolinska Institutet  
33 Box 210  
34 SE-17177 Stockholm, Sweden  
35 [eva.rasmussen.barr@ki.se](mailto:eva.rasmussen.barr@ki.se)  
36

37 Word count: 3350

38 Key words: musculoskeletal diseases, prevention, sleep, stress, work  
39  
40  
41  
42  
43  
44  
45  
46  
47  
48  
49  
50  
51  
52  
53  
54  
55  
56  
57  
58  
59  
60



1 **ABSTRACT** (word count 221)

2 **Objective** The study whether job strain and sleep disturbances among persons with  
3 *occasional* NSAP are prognostic factors for having experienced at least one episode of  
4 *troublesome* NSAP; and to determine whether sleep disturbances modify the association  
5 between job strain and troublesome NSAP.

6 **Design** Prospective cohort study

7 **Setting** Stockholm, Sweden

8 **Participants** A population-based cohort of individuals with occasional NSAP (n = 6,979)  
9 who answered surveys in 2006 and 2010.

10 **Outcome measures** Report of at least one episode of troublesome NSAP in 2010

11 **Results:** The odds ratios for troublesome NSAP at follow-up were in individuals exposed to  
12 passive jobs 1.2 (95% CI 0.9–1.4); to active jobs 1.3 (95% CI 1.1–1.5); to high strain 1.5  
13 (95% CI 1.0–2.4); to mild sleep disturbances 1.4 (95% CI 1.3–1.6); and to severe sleep  
14 disturbances 2.2 (95% CI 1.6–3.0). High strain and active jobs were associated with having  
15 experienced at least one episode of troublesome NSAP the previous six months in persons  
16 with sleep disturbances, but not in individuals without sleep disturbances.

17 **Conclusion:** Our results indicate that high strain, active jobs and sleep disturbances are  
18 prognostic factors that should be taken into account when implementing preventive measures  
19 to minimize the risk of troublesome NSAP among people of working age. We suggest that  
20 sleep disturbances may modify the association between job strain and troublesome  
21 neck/shoulder/arm pain.

22

1

2

## Strengths and limitations

3

- This study adds new information to the limited knowledge about factors of importance for the risk of episodes of *troublesome* neck/shoulder/arm pain (NSAP) among working-age individuals who report *occasional* neck pain.

6

- Strength lies in its prospective design based on a general population of working age and the fact that prognostic factors were assessed prior to the outcome.

8

- A further strength is the complete study sample and that several potential confounders were taken into account, even though unmeasured or residual confounding cannot be ruled out.

11

- A limitation of the study is that we lack information about the duration of the exposures prior to baseline or about their occurrence during the four-year follow-up period. This may limit interpretation of the results.

14

15

16

17

18

19

20

21

22

23

24

25

26

## 1 INTRODUCTION

2 The prevalence of musculoskeletal pain is overall high.[1] Among workers neck/shoulder/arm  
3 pain (NSAP) is common, causing personal suffering and an economic burden for society.[2-4]  
4 NSAP is a recurrent disorder that follows a course. Remissions, exacerbations, and prior pain  
5 episodes seem to increase the risk of subsequent pain episodes.[5-7] Although most people  
6 will experience neck pain to some degree, not everybody will experience chronic or  
7 troublesome neck pain.[8] Studying modifiable prognostic determinants of NSAP is important  
8 because it may help prevent severe conditions and promote recovery. Several determinants of  
9 the course of pain in the neck/shoulder have been suggested. Results from a cohort study in  
10 Sweden on the long-term prognosis of neck/shoulder pain showed that biomechanical  
11 exposure such as manual handling  $\geq 50\text{N}$  and working with one's hands above shoulder level  
12 negatively influences the prognosis.[9] Further, individuals who take sick leave because of  
13 neck pain, seem to be prone to subsequent episodes of lost time at work and prolonged  
14 disability.[7] A recent study of persons with occasional neck pain reported that social factors  
15 such as economic stress and family income are associated with an increased risk of  
16 development of troublesome neck pain.[10] In addition, work-related factors—physical,  
17 psychological and psychosocial—are considered important for the course of neck/shoulder  
18 pain.[7 11] One widely-used work-related model for various disorders is the job strain model,  
19 also known as the “demand-control model”.[12-15] Here high strain is described as a  
20 combination of high psychological job demands with low job decision latitude. This  
21 extensively studied model[14 16] further defines a combination of high job demands and  
22 high job control as an active job situation, and a combination of low job control and low job  
23 demands as a passive job situation. It has been proposed that workers exposed to job strain  
24 face an increased risk of psychological strain and stress-related diseases.[16-18] Recent

1  
2  
3 1 research, however, has yielded contradictory results; some studies report a strong association  
4  
5 2 between high strain and the prognosis of NSAP,[19-20] while others report no associations.[8  
6  
7 3 21] According to a recent review, several studies on job strain and NSAP are cross-sectional;  
8  
9 4 thus, no assessment of temporality can be made.[22]  
10  
11  
12 5

13  
14 6 Several factors most likely modify the association between job strain and the trajectory from  
15  
16 7 *occasional* NSAP to *troublesome*. One debated condition which may be associated with the  
17  
18 8 impact of job strain is exhaustion [17] in terms of prolonged fatigue and sleep  
19  
20 9 disturbances.[12] While sleep is considered an important part of physical restoration,  
21  
22 10 curtailment of sleep by itself may be associated with the prognosis of musculoskeletal pain.  
23  
24 11 Diverse associations between work-related psychological as well as psychosocial factors and  
25  
26 12 sleep disturbances have been shown.[23-26] However, few studies explore whether sleep  
27  
28 13 disturbances play a role as an effect-measure modifier for the association between job strain  
29  
30 14 and the risk of developing NSAP.[12 23]  
31  
32  
33  
34 15

35  
36 16 To our knowledge, no longitudinal study has investigated the effects of the exposures job  
37  
38 17 strain and sleep disturbances in a general population of working age reporting occasional  
39  
40 18 NSAP at baseline. We therefore sought to study whether these conditions are prognostic  
41  
42 19 factors for having experienced at least one episode of troublesome NSAP during the previous  
43  
44 20 six months. We further sought to explore whether an association between job strain and  
45  
46 21 troublesome NSAP is modified by sleep disturbances.  
47  
48  
49

## 50 **METHODS**

### 51 52 53 23 **Study design** 54 55 56 57 58 59 60

1 This longitudinal cohort study is based on the Stockholm Public Health Cohort, (n=25,167), a  
2 population-based cohort set up by the Stockholm County Council to gather information about  
3 the determinants and consequences of significant contributors to the burden of disease.[27]  
4 The study was approved by the Regional Ethical Review Board in Stockholm, Sweden (Diary  
5 nr. 2013/497-32).

## 6 **Study population**

7 Participants aged 18-84 years were selected using area-stratified random samples of the  
8 Stockholm population, an urban region including 24 municipalities with approximately 1.4  
9 million inhabitants (2002). Details about the data collection have been reported  
10 elsewhere.[27] Randomly selected individuals (n = 56,634) (18-84 yrs old) after stratification  
11 for gender and residential area received a baseline postal or web-based questionnaire in 2006.  
12 Sixty-one percent of these (n = 34,707) answered the questionnaire. A total of 25,167 of those  
13 who answered the baseline questionnaire answered a follow-up questionnaire in 2010, and  
14 members of this group constitute Stockholm Public Health Cohort 06/10 (SPHC 06/10). For  
15 the present purpose, only those aged 61 years and below at baseline in SPHC 06/10 were  
16 included in order to limit the study to persons of working age, since the follow-up time was  
17 four years and the official retirement age in Sweden is 65. Those with missing data on the  
18 questions on high job demands, low job control, and sleep were excluded from the cohort (n =  
19 1,212). In addition, those who reported no NSAP or more frequent than occasional at baseline  
20 were excluded (n = 3,789; Fig 1). Thus, the study population comprises persons who reported  
21 occasional NSAP at baseline (n = 6,979). Occasional pain was indicated if participants  
22 responded to the question “During the previous six months, have you experienced pain in  
23 neck, shoulder and/or arms?” with either “Yes, a couple of days in the last six months” or  
24 “Yes, a couple of days each month.”

1  
2  
3 14  
5  
6 2 *Insert Fig 1 about here*7  
8  
9 3 **Figure 1** Flowchart of inclusion process10  
11  
12 4 **Questionnaires**13  
14 5 Baseline data was elicited with questions regarding demographic characteristics, physical and  
15  
16 6 psychological health, physical and psychosocial work environment, lifestyle factors,  
17  
18 7 socioeconomics, social relations, and sick leave. These questions were included in the 2006  
19  
20 8 survey, as reported elsewhere.[27]21  
22 9  
23  
24 10 The potential prognostic factors studied were self-reported job strain; combinations of job  
25  
26 11 demands and job control (high strain, active and passive jobs) and sleep disturbances –  
27  
28 12 reported at baseline.29  
30  
31  
32 13  
33  
34 14 *The Job strain model*35  
36 15 Job demands and job control were categorized according to the job strain model and analysed  
37  
38 16 as follows: (i) low strain (low job demands and high job control), (ii) active jobs (high job  
39  
40 17 demands and high job control), (iii) passive jobs (low job demands and low job control) and  
41  
42 18 (iiii) high strain (high job demands and low job control) (Fig 2). Four questions in the  
43  
44 19 baseline questionnaire were used for this purpose; two about job demands and two about job  
45  
46 20 control. The original Job Content Questionnaire (JQC) has five items on job demand and nine  
47  
48 21 on job control.[28-29] The use of a partial scale compared to a complete, multi-item job-  
49  
50 22 demands-and-control instrument is reportedly feasible, exhibiting high correlations to a  
51  
52 23 complete instrument (Pearson's correlation coefficient,  $r = 0.76-0.88$ ); in addition, the present  
53  
54 24 partial instrument assesses the same underlying concepts as the complete instrument.[30] To

1 test the internal consistency of the four questions used for job strain in the present study,  
2 Cronbach's alpha was calculated for job demands ( $\alpha = 0.53$ ) and job control ( $\alpha = 0.77$ ).

4 The two questions used to measure job demands were:

5 (a) "Do you have enough time to complete your assignments at work?" The answers were  
6 dichotomized into yes (yes, usually/always; yes, sometimes) and no (no, rarely; no, never)

7 (b) "Are there contradictory demands involved in your job?" The answers were dichotomized  
8 into yes (yes, usually/always; yes, sometimes) and no (no, rarely; no, never).

10 The two questions used to measure job control were:

11 (c) "Are you free to decide what needs to be done at work?" The answers were dichotomized  
12 into yes (yes, usually/always; yes, sometimes) and no (no, rarely; no, never).

13 (d) "Are you free to decide how your work is to be carried out?" The answers were  
14 dichotomized into yes (yes, usually/always; yes, sometimes) and no (no, rarely; no, never).

16 Persons with an active job situation had a combination of high job demands (question a=no,  
17 b=yes) and high job control (question c=yes, d=yes). Those with a passive job situation had  
18 a combination of low job demands (question a=yes, b=no) and low job control (question  
19 c=no, d=no) and persons with job strain a combination of high job demands (question a=no,  
20 b=yes) and low control (question c=no, d=no).

22 *Insert fig 2 about here*

24 **Figure 2** The job strain model [14]

1  
2  
3 1 *Sleep disturbances*

4  
5 2 Sleep disturbances were assessed with the question “Do you have difficulty sleeping?” The  
6  
7 3 response options were no; yes, somewhat (classified as mild sleep disturbances); and yes,  
8  
9 4 severe (classified as severe sleep disturbances). The question has been included in the  
10  
11 5 Stockholm Public Health surveys since 2002, to determine longitudinally the prevalence of  
12  
13 6 such disturbances among the population.[31]

14  
15  
16  
17 7 **Outcome**

18  
19 8 The outcome of having experienced an episode of troublesome neck/shoulder/arm pain  
20  
21 9 (NSAP) during the previous six months – was based on two questions in the 2010 follow-up  
22  
23 10 survey. Participants who answered “yes” to both of the following questions were defined as  
24  
25 11 experiencing troublesome NSAP: “During the last six months, have you felt pain in your neck  
26  
27 12 or upper back and/or shoulder or arms? If so, have these restricted your work capacity or  
28  
29 13 hindered you in daily activities to some degree or to a high degree?”  
30  
31  
32

33 14  
34  
35 15 **Potential confounders**

36  
37 16 Potential confounders were chosen from the baseline survey and guided by knowledge from  
38  
39 17 prior research, and by clinical considerations.[7 32] The potential confounders were age  
40  
41 18 (continuous and <44/>45 years), sex (men/women) smoking habits (daily/not daily), alcohol  
42  
43 19 consumption (sometime during a period of 12 months /no), back pain the previous six months  
44  
45 20 (yes; more than two days), socioeconomic class (unskilled and semiskilled workers, skilled  
46  
47 21 workers, assistant non manual employee, intermediate non-manual employees  
48  
49 22 employed/ self-employed/professional), low support at work from superior (yes), low support  
50  
51 23 at work from colleagues (yes), main physical workload in the past 12 months (sedentary,  
52  
53 24 light, moderately heavy, heavy), time spent on household work per day (yes > 5 hours),  
54  
55  
56  
57  
58  
59  
60



1 economic stress based on the question “Did it happen that during the past 12 months you ran  
2 out of salary/money and had to borrow from relatives or friends in order to pay for food or  
3 rent?” (yes), country of birth (Sweden, elsewhere), and leisure physical activity level  
4 (sedentary < 2 hours per week/active  $\geq$  2 hours per week), sleep disturbances (none or  
5 mild/severe) ; (Table 1).

6  
7 Job strain (low strain, active and passive jobs and high strain) was tested regarding  
8 confounding in the sleep-disturbances model; sleep disturbances were considered to be  
9 potentially in the causal pathway between job strain and episodes of troublesome NSAP.

### 10 11 **Statistical analysis**

12 Numbers and proportions (%) for the variables were used to describe the baseline  
13 characteristics. Logistic regression models were used to assess associations between the  
14 prognostic factors and the outcome. Results are presented as odds ratios (OR), along with  
15 95% confidence intervals (95% CI).

16  
17 Crude associations between (i) active jobs (high job demands/ control) (ii) passive jobs (low  
18 job control/ demands) and (iii) high strain, as discrete factors on one hand, and as a new  
19 episode of troublesome NSAP, on the other, were calculated. Low strain (high job control/  
20 low job demands) served as the reference category. We also calculated crude associations  
21 between sleep disturbances (mild, severe, and none) and troublesome NSAP.

22  
23 Two regression models were built for the analyses: one with the four levels of job strain -  
24 (low strain, active jobs, passive jobs, and high strain) - and one with the three levels of sleep  
25 disturbances (none, mild, severe). For each of the two regression models, potential

1  
2  
3 1 confounding factors were added one at a time to the crude regression model,. If a factor  
4  
5 2 changed the crude OR by 10% or more, it was considered a confounder and was entered into  
6  
7 3 the final model, in accordance with Rothman et al.[33] Finally, we stratified the analyses of  
8  
9 4 job strain and troublesome NSAP by sleep disturbances/no sleep disturbances in a crude and  
10  
11 5 adjusted model in order to study whether the effect of job strain was modified by sleep  
12  
13 6 disturbances.  
14  
15  
16  
17  
18

19 8 The final adjusted model for the exposures active jobs, passive jobs and high strain included  
20  
21 9 the confounders socioeconomic class, work load and support at work from one's superior. In  
22  
23 10 the final adjusted model for sleep disturbances, we included economic stress.  
24

25 11 Statistical analyses used the STATA® statistical software system version 11.  
26  
27  
28  
29

## 30 13 **RESULTS**

31  
32 14 The characteristics of the study population who experience occasional NSAP at baseline (n =  
33  
34 15 6,979) stratified by the categories of the job strain model are presented in Table 1. Sixty-one  
35  
36 16 percent (n = 4,260) of the cohort were women, and 57% (n = 4,006) were aged 18–44 years.  
37  
38 17 Of the cohort, 1,003 persons (14%) reported active jobs at baseline in 2006, 518 (7%)  
39  
40 18 reported passive jobs in 2010 and 100 (2%) reported high strain. In total, 2,137 (31%)  
41  
42 19 reported severe sleep disturbances at baseline. Twenty-four percent (n = 1,659) of the cohort  
43  
44 20 reported troublesome NSAP at follow-up (2010).  
45  
46  
47  
48

49 22 After control for confounding, high strain and active jobs at baseline were associated with at  
50  
51 23 least one episode of troublesome NSAP experienced during the six months prior to follow-up  
52  
53 24 in 2010 (Table 2). The adjusted analyses showed an OR of 1.3 (95% CI 1.1–1.5) for active  
54  
55  
56  
57  
58  
59  
60

1 jobs, 1.2 (95% CI 0.9–1.4) for passive jobs, and 1.5 (95% CI 1.0–2.4) for high strain,  
2 compared to the reference category low strain.

3  
4 Sleep disturbances at baseline were associated with at least one episode of NSAP during the  
5 previous six months reported at follow-up (Table 2). The adjusted analysis yielded an OR of  
6 1.4 (95% CI 1.3–1.6) for mild sleep disturbances and an OR of 2.2 (95% CI 1.6–3.0) for  
7 severe sleep disturbances, compared to the reference category no sleep disturbances.

8  
9 *Insert Table 2 here*

10  
11 Table 3 shows the results of the stratified analysis. In the stratum *no* sleep disturbances, the  
12 adjusted ORs for the association between active and passive jobs at baseline and troublesome  
13 NSAP at follow-up were 1.1 (95% CI 0.9–1.4) and 1.2 (95% CI 0.9–1.6), respectively, and for  
14 high strain: OR 1.2 (95% CI 0.6–2.1). For the stratum sleep disturbances, the adjusted ORs  
15 between active and passive jobs at baseline and troublesome NSAP at follow-up were 1.3  
16 (95% CI 1.0–1.7) and 1.0 (95% CI 0.7–1.5), respectively. The OR for high strain was 1.8  
17 (95% CI 1.0–3.5).

18  
19 *Insert Table 3 here*

## 20 21 **DISCUSSION**

22 The present results indicate that active jobs (high job demands/high job control) and high  
23 strain (high job demand/low job control), and sleep disturbances, are factors that may be  
24 important for having experienced at least one episode of troublesome neck/shoulder/arm pain

1 (NSAP) during the six months prior to follow-up in persons of working age with occasional  
2 NSAP. Further, sleep disturbances seem to modify the prognostic effect of an active job  
3 situation and in addition a high strain situation. As sleep disturbances and NSAP are common  
4 complaints, our findings are important from a public-health perspective.

5  
6 The study population included individuals who reported *occasional* NSAP at baseline, of  
7 whom some subsequently experienced at least one period of *troublesome* pain at follow-up.  
8 Such a prognostic approach in longitudinal studies of the general population has, to date been  
9 but little used.[22] Job strain is a critical psychosocial work-related factor in the development  
10 of harmful work stress and is associated with the risk of several disorders.[18 34-35]

11 However, not all studies recognize job strain as a prognostic factor for NSAP.[9 22 26] The  
12 discrepancy may be explained by sources of bias, different study designs, or varied study  
13 populations; but results may also depend on differing definitions of neck/shoulder pain.[22]

14  
15 Sleep is considered vital to the recovery of body and mind and has been linked to a state of  
16 altered metabolism—changes that, in turn may be linked to e.g. diabetes and cardiovascular  
17 disease.[36-37] In addition, the metabolic changes that result from sleep disturbance are  
18 similar to those related to stress.[36-37] The present study suggests that sleep disturbances act  
19 as a modifier between the prognosis of troublesome NSAP and the impact of job strain.

20 However, Canivet et al. investigated sleep disturbances as a possible mediating factor in the  
21 pathway between job strain and chronic musculoskeletal pain but found no such association.

22 [12] A recent literature review [25] concludes that strong evidence associates especially high  
23 demands at work (active jobs) with severe sleep disturbances. The modifying effect of sleep  
24 disturbances we found may have different explanations, but since we cannot be sure of the  
25 temporality between the onsets of high strain and sleep disturbances, we can only speculate on

1 the associations. It may be that sleep disturbance is a confounder as well as an effect-measure  
2 modifier. Further, it may be that sleep disturbance is a mediator in the causal pathway  
3 between high strain and new periods of troublesome NSAP. If a causal interaction is present,  
4 the risk of developing troublesome NSAP for a person who experiences both high strain or  
5 active jobs and sleeping disturbances may be higher than the sum of the effects of the two  
6 exposures.

### 9 **Strengths and limitations of the study**

10 The strength of the study lies in its prospective design based on a general population of  
11 working age and on the fact that prognostic factors were assessed prior to the outcome. A  
12 further strength is the complete study sample; moreover, several potential confounders were  
13 taken into account, even though we cannot rule out the risk of unmeasured or residual  
14 confounding, for instance from other psychosocial factors like catastrophizing and  
15 somatization.[38]

16  
17 The well-recognized job strain model was used to assess work-related stress.[14][15] A  
18 frequently-used questionnaire developed to measure the construct job strain is the Job Content  
19 Questionnaire (JCQ), [28] which comprises five items addressing job demands and nine  
20 addressing control. In Stockholm Public Health Cohort 06/10, on which the present study is  
21 based, four items from the JCQ were used to measure the constructs. This was judged feasible  
22 based on a reported of consistently high agreement between partial scales measuring job strain  
23 and a complete survey.[30]

24

1  
2  
3 1 A potential limitation is that the lower sensitivity of a shorter scale may increase the risk of  
4  
5 2 non-differential misclassification of exposure (i.e. in this case, the prognostic factors,  
6  
7 3 resulting in a dilution of the true effect). However, the sensitivity of the shorter scales was  
8  
9 4 reported to be high ( $r > 0.94$ ). [30] In addition, low sensitivity of the exposure measure is  
10  
11 5 mainly a problem when the exposure is common, and this is not the case with job strain.  
12  
13 6

14  
15  
16 7 Sleep disturbances were relatively common (31%). They were investigated with a single  
17  
18 8 question, and this may lead to misclassification of this exposure and differential  
19  
20 9 misclassification, thus a dilution of a true effect.  
21  
22 10

23  
24  
25 11 We used logistic regression for the analyses of the associations in the study. Since the  
26  
27 12 outcome (i.e. troublesome NSAP) is relatively common, the calculated OR might be higher  
28  
29 13 than a corresponding relative risk (RR), and the results should not be interpreted as such. We  
30  
31 14 lack information about the duration of the exposures prior to baseline or about the presence of  
32  
33 15 the exposures during the four-year follow-up period. This may limit the interpretation of the  
34  
35 16 results.  
36  
37 17

38  
39  
40 18 Selection bias is a potential threat to validity and may be present if the loss to follow-up  
41  
42 19 differs among participants exposed and unexposed *and* if the loss is also related to the  
43  
44 20 outcome. [33] Additional analyses showed that the proportion of those exposed to job strain  
45  
46 21 and sleeping disturbances differed only marginally between those who completed the follow-  
47  
48 22 up and those who did not. Accordingly, selection bias may not be a problem in this study.  
49  
50 23

51  
52 23 Job strain may be one of several important factors that influence various disorders and distress  
53  
54 24 — among others, troublesome NSAP. In addition it has been reported recently that there  
55  
56  
57  
58  
59  
60

1  
2  
3 1 seems to be an association between stress-related factors such as high job demands and high  
4  
5 2 strain and an overall unhealthy lifestyle.[18]  
6  
7 3  
8

9  
10 4 In summary, our results indicate that high strain, active jobs and sleep disturbances may be of  
11  
12 5 importance for the prognosis of occasional NSAP, in that these factors are associated with  
13  
14 6 episodes of troublesome NSAP. It is important for employers and caregivers to take reported  
15  
16 7 high strain, active jobs and sleep disturbances into account when implementing measures to  
17  
18 8 minimize the risk of troublesome NSAP in workers. Still, additional large prospective studies  
19  
20 9 are needed to confirm our results and also to identify other modifiable prognostic factors for  
21  
22 10 this public-health problem.  
23  
24  
25  
26

## 27 12 **CONCLUSION**

28  
29 13 Our results indicate that high strain, active jobs and sleep disturbances are prognostic factors  
30  
31 14 that should be taken into account when implementing preventive measures to minimize the  
32  
33 15 risk of troublesome neck/shoulder/arm pain among people of working age. Further, we  
34  
35 16 suggest that sleep disturbances may modify the association between job strain and  
36  
37 17 troublesome neck/shoulder/arm pain.  
38  
39  
40  
41  
42  
43  
44  
45  
46  
47  
48  
49  
50  
51  
52  
53  
54  
55  
56  
57  
58  
59  
60

1  
2  
3 **1 Acknowledgements**  
4

5  
6 *2 Funding and Competing Interests*  
7

8 The Stockholm Public Health Cohort was financed by the Stockholm County Council. All the  
9  
10 authors declare that they have no conflict of interest in connection with this paper. Financial  
11  
12 support for the study was obtained from the AFA Insurance postdoc scholarship.  
13  
14

15  
16 **6 License for Publication**  
17

18 The corresponding author is entitled to grant on behalf of all the authors, and does grant on  
19  
20 behalf of all the authors, an exclusive license (or non-exclusive for government) on a  
21  
22 worldwide basis to the BMJ Publishing Group Ltd to permit this article (if accepted) to be  
23  
24 published in any BMJ PGL products and sublicenses such use and exploitation of all  
25  
26 subsidiary rights, as set out in our license.

27 (<http://group.bmj.com/products/journals/instructions-for-authors/licence-forms>)

28 Competing Interest: None declared.  
29  
30

31 **15 Contributors' statement**  
32  
33

34 All five authors contributed to the design of the study and to the interpretation of the results.  
35

36 ERB and ES conducted the statistical analyses. ERB wrote the first version of the manuscript.  
37

38 All the authors critically revised different versions of the manuscript and all read the final  
39  
40 version.  
41  
42

43  
44  
45 **21 Data sharing statement**  
46

47 No additional data available  
48  
49  
50  
51  
52  
53  
54  
55  
56  
57  
58  
59  
60



1  
2  
3 **REFERENCES**

- 4 1. Picavet HS, Hazes JM. Prevalence of self reported musculoskeletal diseases is high. *Ann Rheum Dis*  
5 2003;**62**(7):644-50
- 6 2. Feveile H, Jensen C, Burr H. Risk factors for neck-shoulder and wrist-hand symptoms in a 5-year  
7 follow-up study of 3,990 employees in Denmark. *Int Arch Occup Environ Health*  
8 2002;**75**(4):243-51 doi: 10.1007/s00420-001-0298-9[published Online First: Epub Date]].
- 9 3. Cassou B, Derriennic F, Monfort C, et al. Chronic neck and shoulder pain, age, and working  
10 conditions: longitudinal results from a large random sample in France. *Occup Environ Med*  
11 2002;**59**(8):537-44
- 12 4. Skillgate E, Magnusson C, Lundberg M, et al. The age- and sex-specific occurrence of bothersome  
13 neck pain in the general population - results from the Stockholm public health cohort. *BMC*  
14 *Musculoskelet Disord* 2012;**13**(1):185 doi: 1471-2474-13-185 [pii]  
15 10.1186/1471-2474-13-185[published Online First: Epub Date]].
- 16 5. Guzman J, Hurwitz EL, Carroll LJ, et al. A new conceptual model of neck pain: linking onset, course,  
17 and care: the Bone and Joint Decade 2000-2010 Task Force on Neck Pain and Its Associated  
18 Disorders. *Spine (Phila Pa 1976)* 2008;**33**(4 Suppl):S14-23 doi:  
19 10.1097/BRS.0b013e3181643efb  
20 00007632-200802151-00006 [pii][published Online First: Epub Date]].
- 21 6. Carroll LJ, Hogg-Johnson S, van der Velde G, et al. Course and prognostic factors for neck pain in  
22 the general population: results of the Bone and Joint Decade 2000-2010 Task Force on Neck  
23 Pain and Its Associated Disorders. *Spine (Phila Pa 1976)* 2008;**33**(4 Suppl):S75-82 doi:  
24 10.1097/BRS.0b013e31816445be  
25 00007632-200802151-00012 [pii][published Online First: Epub Date]].
- 26 7. Carroll LJ, Hogg-Johnson S, Cote P, et al. Course and prognostic factors for neck pain in workers:  
27 results of the Bone and Joint Decade 2000-2010 Task Force on Neck Pain and Its Associated  
28 Disorders. *Spine (Phila Pa 1976)* 2008;**33**(4 Suppl):S93-100 doi:  
29 10.1097/BRS.0b013e31816445d4  
30 00007632-200802151-00014 [pii][published Online First: Epub Date]].
- 31 8. Haldeman S, Carroll LJ, Cassidy JD. The empowerment of people with neck pain: introduction: the  
32 Bone and Joint Decade 2000-2010 Task Force on Neck Pain and Its Associated Disorders.  
33 *Spine (Phila Pa 1976)* 2008;**33**(4 Suppl):S8-S13 doi: 10.1097/BRS.0b013e3181643f51  
34 00007632-200802151-00005 [pii][published Online First: Epub Date]].
- 35 9. Grooten WJ, Mulder M, Josephson M, et al. The influence of work-related exposures on the  
36 prognosis of neck/shoulder pain. *Eur Spine J* 2007;**16**(12):2083-91 doi: 10.1007/s00586-007-  
37 0481-0[published Online First: Epub Date]].
- 38 10. Palmlof L, Skillgate E, Alfredsson L, et al. Does income matter for troublesome neck pain? A  
39 population-based study on risk and prognosis. *J Epidemiol Community Health*  
40 2012;**66**(11):1063-70 doi: jech-2011-200783 [pii]  
41 10.1136/jech-2011-200783[published Online First: Epub Date]].
- 42 11. Cote P, van der Velde G, Cassidy JD, et al. The burden and determinants of neck pain in workers:  
43 results of the Bone and Joint Decade 2000-2010 Task Force on Neck Pain and Its Associated  
44 Disorders. *Spine (Phila Pa 1976)* 2008;**33**(4 Suppl):S60-74 doi:  
45 10.1097/BRS.0b013e3181643ee4  
46 00007632-200802151-00011 [pii][published Online First: Epub Date]].
- 47 12. Canivet C, Ostergren PO, Choi B, et al. Sleeping problems as a risk factor for subsequent  
48 musculoskeletal pain and the role of job strain: results from a one-year follow-up of the  
49 Malmo Shoulder Neck Study Cohort. *Int J Behav Med* 2008;**15**(4):254-62 doi: 905440510 [pii]  
50 10.1080/10705500802365466[published Online First: Epub Date]].
- 51 13. Ostergren PO, Hanson BS, Balogh I, et al. Incidence of shoulder and neck pain in a working  
52 population: effect modification between mechanical and psychosocial exposures at work?

- 1  
2  
3 1 Results from a one year follow up of the Malmo shoulder and neck study cohort. *J Epidemiol*  
4 2 *Community Health* 2005;**59**(9):721-8 doi: 59/9/721 [pii]  
5 3 10.1136/jech.2005.034801[published Online First: Epub Date] | .  
6 4 14. Theorell T, Karasek RA. Current issues relating to psychosocial job strain and cardiovascular  
7 5 disease research. *J Occup Health Psychol* 1996;**1**(1):9-26  
8 6 15. Karasek R. Job demands, job decision latitude, and mental strain: Implications for job redesign.  
9 7 *Adm Sci. Q.* 1979(24):285-307  
10 8 16. Karasek R, Baker D, Marxer F, et al. Job decision latitude, job demands, and cardiovascular  
11 9 disease: a prospective study of Swedish men. *Am J Public Health* 1981;**71**(7):694-705  
12 10 17. Lindeberg SI, Rosvall M, Choi B, et al. Psychosocial working conditions and exhaustion in a  
13 11 working population sample of Swedish middle-aged men and women. *Eur J Public Health*  
14 12 2011;**21**(2):190-6 doi: ckq039 [pii]  
15 13 10.1093/eurpub/ckq039[published Online First: Epub Date] | .  
16 14 18. Heikkila K, Fransson EI, Nyberg ST, et al. Job Strain and Health-Related Lifestyle: Findings From an  
17 15 Individual-Participant Meta-Analysis of 118 000 Working Adults. *Am J Public Health* 2013 doi:  
18 16 10.2105/AJPH.2012.301090[published Online First: Epub Date] | .  
19 17 19. Harcombe H, McBride D, Derrett S, et al. Prevalence and impact of musculoskeletal disorders in  
20 18 New Zealand nurses, postal workers and office workers. *Aust N Z J Public Health*  
21 19 2009;**33**(5):437-41 doi: AZPH425 [pii]  
22 20 10.1111/j.1753-6405.2009.00425.x[published Online First: Epub Date] | .  
23 21 20. Andersson HI. The course of non-malignant chronic pain: a 12-year follow-up of a cohort from the  
24 22 general population. *Eur J Pain* 2004;**8**(1):47-53 doi: S1090-3801(03)00064-8 [pii]  
25 23 10.1016/S1090-3801(03)00064-8[published Online First: Epub Date] | .  
26 24 21. Fredriksson K, Alfredsson L, Ahlberg G, et al. Work environment and neck and shoulder pain: the  
27 25 influence of exposure time. Results from a population based case-control study. *Occup*  
28 26 *Environ Med* 2002;**59**(3):182-8  
29 27 22. Park JK, Jang SH. Association between Upper Extremity Musculoskeletal Disorders and  
30 28 Psychosocial Factors at Work: A Review on the Job DCS Model's Perspective. *Saf Health Work*  
31 29 2010;**1**(1):37-42 doi: 10.5491/SHAW.2010.1.1.37[published Online First: Epub Date] | .  
32 30 23. Kaila-Kangas L, Kivimaki M, Harma M, et al. Sleep disturbances as predictors of hospitalization for  
33 31 back disorders-a 28-year follow-up of industrial employees. *Spine (Phila Pa 1976)*  
34 32 2006;**31**(1):51-6 doi: 00007632-200601010-00012 [pii][published Online First: Epub Date] | .  
35 33 24. Hoogendoorn WE, Bongers PM, de Vet HC, et al. Psychosocial work characteristics and  
36 34 psychological strain in relation to low-back pain. *Scand J Work Environ Health*  
37 35 2001;**27**(4):258-67 doi: 613 [pii][published Online First: Epub Date] | .  
38 36 25. SBU SCoHTA. Arbetsmiljöns betydelse  
39 37 för sömnstörningar. ISBN 978-91-85413-57-7 ed. Stockholm, 2013.  
40 38 26. Hanson LL, Akerstedt T, Naswall K, et al. Cross-lagged relationships between workplace demands,  
41 39 control, support, and sleep problems. *Sleep* 2011;**34**(10):1403-10 doi:  
42 40 10.5665/SLEEP.1288[published Online First: Epub Date] | .  
43 41 27. Svensson AC, Fredlund P, Laflamme L, et al. Cohort Profile: The Stockholm Public Health Cohort.  
44 42 *Int J Epidemiol* 2012 doi: dys126 [pii]  
45 43 10.1093/ije/dys126[published Online First: Epub Date] | .  
46 44 28. Karasek R, Brisson C, Kawakami N, et al. The Job Content Questionnaire (JCQ): an instrument for  
47 45 internationally comparative assessments of psychosocial job characteristics. *J Occup Health*  
48 46 *Psychol* 1998;**3**(4):322-55  
49 47 29. Job Content Questionnaire Rf. (<http://www.icqcenter.org>)  
50 48 30. Fransson EI, Nyberg ST, Heikkila K, et al. Comparison of alternative versions of the job demand-  
51 49 control scales in 17 European cohort studies: the IPD-Work consortium. *BMC Public Health*  
52 50 2012;**12**:62 doi: 1471-2458-12-62 [pii]  
53  
54  
55  
56  
57  
58  
59  
60

- 1  
2  
3 1 10.1186/1471-2458-12-62[published Online First: Epub Date] |.
- 4 2 31. Folkhälsoinstitut S. Aim and background of questions included in The Swedish Public Health  
5 3 Cohort. ISSN: 1653-0802 2011
- 6 4 32. Hogg-Johnson S, van der Velde G, Carroll LJ, et al. The burden and determinants of neck pain in  
7 5 the general population: results of the Bone and Joint Decade 2000-2010 Task Force on Neck  
8 6 Pain and Its Associated Disorders. *J Manipulative Physiol Ther* 2009;**32**(2 Suppl):S46-60 doi:  
9 7 S0161-4754(08)00337-0 [pii]
- 10 8 10.1016/j.jmpt.2008.11.010[published Online First: Epub Date] |.
- 11 9 33. Rothman KJ, Greenland, S. *Introduction to stratified analysis*. 3rd edn ed. Philadelphia: Wolters  
12 10 Kluwer Health/Lippincott Williams&Williams, 2008.
- 13 11 34. Heraclides A, Chandola T, Witte DR, et al. Psychosocial stress at work doubles the risk of type 2  
14 12 diabetes in middle-aged women: evidence from the Whitehall II study. *Diabetes Care*  
15 13 2009;**32**(12):2230-5 doi: dc09-0132 [pii]
- 16 14 10.2337/dc09-0132[published Online First: Epub Date] |.
- 17 15 35. Laszlo KD, Ahnve S, Hallqvist J, et al. Job strain predicts recurrent events after a first acute  
18 16 myocardial infarction: the Stockholm Heart Epidemiology Program. *J Intern Med*  
19 17 2010;**267**(6):599-611 doi: JIM2196 [pii]
- 20 18 10.1111/j.1365-2796.2009.02196.x[published Online First: Epub Date] |.
- 21 19 36. Westerlund H, Alexanderson K, Akerstedt T, et al. Work-related sleep disturbances and sickness  
22 20 absence in the Swedish working population, 1993-1999. *Sleep* 2008;**31**(8):1169-77
- 23 21 37. Akerstedt T, Nilsson PM. Sleep as restitution: an introduction. *J Intern Med* 2003;**254**(1):6-12 doi:  
24 22 1195 [pii][published Online First: Epub Date] |.
- 25 23 38. Karels CH, Bierma-Zeinstra SM, Burdorf A, et al. Social and psychological factors influenced the  
26 24 course of arm, neck and shoulder complaints. *J Clin Epidemiol* 2007;**60**(8):839-48 doi: S0895-  
27 25 4356(06)00459-8 [pii]
- 28 26 10.1016/j.jclinepi.2006.11.012[published Online First: Epub Date] |.
- 29 27  
30 28  
31 29  
32 30  
33 31  
34 32  
35 33  
36 34  
37 35  
38 36  
39 37  
40 38  
41 39  
42 40  
43 41  
44 42  
45 43  
46 44  
47 45  
48 46  
49 47  
50 48  
51 49  
52 50  
53 51  
54 52  
55 53  
56 54  
57 55  
58 56  
59 57  
60 58

1  
2  
3  
4  
5  
6  
7  
8  
9  
10  
11  
12  
13  
14  
15  
16  
17  
18  
19  
20  
21  
22  
23  
24  
25  
26  
27  
28  
29  
30  
31  
32  
33  
34  
35  
36  
37  
38  
39  
40  
41  
42  
43  
44  
45  
46  
47  
48  
49  
50  
51  
52  
53  
54  
55  
56  
57  
58  
59  
60

**Table 1.** Baseline sociodemographic and psychosocial characteristics in the study population of persons with occasional neck, shoulder and/or arm pain at baseline (n = 6,979).

---

For peer review only

1  
2  
3  
4  
5  
6  
7

|                                                                     | Low strain  |           | Active jobs |           | Passive jobs |           | High strain |           |
|---------------------------------------------------------------------|-------------|-----------|-------------|-----------|--------------|-----------|-------------|-----------|
|                                                                     | (n = 5,358) |           | (n = 1,003) |           | (n = 518)    |           | (n = 100)   |           |
|                                                                     | N           | %         | N           | %         | n            | %         | n           | %         |
| <b>Age</b>                                                          |             |           |             |           |              |           |             |           |
| 18–44                                                               | 2,981       | <b>56</b> | 613         | <b>61</b> | 348          | <b>67</b> | 64          | <b>64</b> |
| 45–61                                                               | 2,377       | <b>44</b> | 390         | <b>39</b> | 170          | <b>33</b> | 36          | <b>36</b> |
| <b>Sex</b>                                                          |             |           |             |           |              |           |             |           |
| Men                                                                 | 2,145       | <b>40</b> | 384         | <b>38</b> | 158          | <b>30</b> | 32          | <b>32</b> |
| Women                                                               | 3,213       | <b>60</b> | 619         | <b>62</b> | 360          | <b>70</b> | 68          | <b>68</b> |
| <b>Country of birth</b>                                             |             |           |             |           |              |           |             |           |
| Sweden                                                              | 4,600       | <b>86</b> | 899         | <b>90</b> | 404          | <b>78</b> | 83          | <b>83</b> |
| Elsewhere                                                           | 758         | <b>14</b> | 104         | <b>10</b> | 114          | <b>22</b> | 17          | <b>17</b> |
| <b>Socioeconomic class*</b>                                         |             |           |             |           |              |           |             |           |
| Unskilled and semiskilled workers                                   | 656         | <b>13</b> | 64          | <b>7</b>  | 162          | <b>34</b> | 33          | <b>35</b> |
| Skilled workers                                                     | 611         | <b>12</b> | 62          | <b>6</b>  | 76           | <b>16</b> | 11          | <b>11</b> |
| Assistant non-manual employees                                      | 778         | <b>15</b> | 107         | <b>11</b> | 108          | <b>23</b> | 12          | <b>12</b> |
| Intermediate non-manual employees                                   | 1,358       | <b>26</b> | 321         | <b>33</b> | 90           | <b>19</b> | 24          | <b>24</b> |
| Employed/self-employed professionals, civil servants and executives | 1,265       | <b>24</b> | 331         | <b>34</b> | 29           | <b>6</b>  | 10          | <b>10</b> |
| Self-employed (other than professionals)                            | 492         | <b>10</b> | 84          | <b>9</b>  | 8            | <b>2</b>  | 4           | <b>4</b>  |
| <b>Sleep disturbances</b>                                           |             |           |             |           |              |           |             |           |
| None or mild                                                        | 3,861       | <b>72</b> | 601         | <b>60</b> | 326          | <b>63</b> | 54          | <b>54</b> |
| Severe                                                              | 1,497       | <b>28</b> | 402         | <b>40</b> | 192          | <b>37</b> | 46          | <b>46</b> |
| <b>Work load</b>                                                    |             |           |             |           |              |           |             |           |
| Sedentary                                                           | 2,207       | <b>41</b> | 464         | <b>46</b> | 192          | <b>37</b> | 36          | <b>36</b> |
| Light                                                               | 1,572       | <b>29</b> | 272         | <b>27</b> | 119          | <b>23</b> | 18          | <b>18</b> |
| Moderately heavy                                                    | 1,156       | <b>22</b> | 192         | <b>19</b> | 149          | <b>29</b> | 18          | <b>18</b> |
| Heavy                                                               | 409         | <b>8</b>  | 74          | <b>7</b>  | 56           | <b>11</b> | 27          | <b>27</b> |

|                                                      |       |           |     |           |     |           |    |           |
|------------------------------------------------------|-------|-----------|-----|-----------|-----|-----------|----|-----------|
| <b>Low support at work from superior (yes)</b>       | 458   | <b>18</b> | 321 | <b>32</b> | 183 | <b>35</b> | 69 | <b>69</b> |
| <b>Low support at work from colleagues (yes)</b>     | 622   | <b>9</b>  | 150 | <b>15</b> | 71  | <b>14</b> | 20 | <b>20</b> |
| <b>Economic stress (yes)†</b>                        | 367   | <b>7</b>  | 77  | <b>8</b>  | 73  | <b>14</b> | 16 | <b>16</b> |
| <b>Household work</b>                                |       |           |     |           |     |           |    |           |
| >5 hrs./week                                         | 2,135 | <b>40</b> | 456 | <b>45</b> | 183 | <b>36</b> | 39 | <b>39</b> |
| <b>Co-morbidity LBP</b>                              |       |           |     |           |     |           |    |           |
| Yes, 2 days or more often during previous six months | 3,318 | <b>62</b> | 648 | <b>65</b> | 345 | <b>67</b> | 67 | <b>67</b> |
| <b>Smoking habits (daily)</b>                        | 702   | <b>13</b> | 121 | <b>12</b> | 79  | <b>15</b> | 13 | <b>13</b> |
| <b>Alcohol (yes, sometime during last 12 months)</b> | 4,945 | <b>93</b> | 949 | <b>95</b> | 458 | <b>89</b> | 87 | <b>87</b> |
| <b>Leisure physical activity level</b>               |       |           |     |           |     |           |    |           |
| Sedentary < 2hr/week                                 | 477   | <b>9</b>  | 102 | <b>10</b> | 83  | <b>16</b> | 18 | <b>18</b> |
| Active ≥2 hrs./week                                  | 4,877 | <b>91</b> | 895 | <b>89</b> | 432 | <b>84</b> | 81 | <b>81</b> |

\*Socioeconomic class: based on occupation and education † Economic stress ("Did it happen that during the past 12 months you ran out of salary/money and had to borrow from relatives and friends in order to pay for food or rent?")

1

2

3

4

5

6

7

8

1  
2  
3 1  
4  
5  
6 2  
7  
8  
9 3  
10  
11  
12 4  
13  
14  
15 5  
16  
17  
18 6  
19  
20  
21 7  
22  
23  
24 8  
25  
26  
27 9  
28  
29  
30 10  
31  
32  
33 11  
34  
35  
36 12  
37  
38  
39 13  
40  
41  
42 14  
43  
44  
45 15  
46  
47  
48 16  
49  
50  
51 17  
52  
53  
54 18  
55  
56  
57  
58  
59  
60

For peer review only

**Table 2.** Associations between active jobs (high job demands/high control) and passive jobs (low job control/low job demands), high strain (high job demands/low job control) and sleep disturbances and the risk of experiencing at least one episode of *troublesome* neck/shoulder/arm pain. The associations are presented as crude and adjusted odds ratios (OR) and 95% confidence intervals (95% CI).

| Exposure                               | No.exp.<br>Cases<br>(total) | Crude<br>OR (95% CI) | P     | Adjusted<br>OR (95% CI) | p     |
|----------------------------------------|-----------------------------|----------------------|-------|-------------------------|-------|
| Low strain<br>(reference)              | 1,219<br>(4,023)            | 1                    | -     | 1                       | -     |
| Active jobs                            | 257<br>(725)                | 1.2<br>(1.0–1.4)     | 0.05  | 1.3*<br>(1.1–1.5)       | 0.006 |
| Passive jobs                           | 145<br>(356)                | 1.3<br>(1.1–1.6)     | 0.004 | 1.2*<br>(0.9–1.4)       | 0.2   |
| High strain                            | 38<br>(62)                  | 2.0<br>(1.3–3.0)     | 0.001 | 1.5*<br>(1.0–2.4)       | 0.06  |
| No sleep<br>disturbance<br>(reference) | 1,035<br>(3,697)            | 1                    |       | 1                       |       |
| Mild sleep<br>disturbance              | 547<br>(1,358)              | 1.4<br>(1.3–1.6)     | <0.00 | 1.4‡<br>(1.3–1.6)       | <0.00 |
| Severe sleep<br>disturbance            | 77<br>(111)                 | 2.5<br>(1.8–3.3)     | <0.00 | 2.2‡<br>(1.6–3.0)       | <0.00 |

\*Adjusted for socio-economic class, work load and support from superior, ‡ adjusted for economic stress

1

2

3

4



**Table 3.** Associations between active jobs (high job demands/high job control), passive jobs (low job control/low job demands), high strain (high job demands/low control) and troublesome neck, shoulder and/or arm pain, stratified for *no* sleep disturbances/ sleep disturbances, presented as crude and adjusted odds ratios (OR) and 95% confidence intervals (95% CI).

| Exposure               | No sleep disturbances  |                   |                       |     | Sleep disturbances |                   |                       |      |
|------------------------|------------------------|-------------------|-----------------------|-----|--------------------|-------------------|-----------------------|------|
|                        | No. exp. Cases (total) | Crude OR (95% CI) | Adjusted* OR (95% CI) | P   | No. exp. Cases     | Crude OR (95% CI) | Adjusted* OR (95% CI) | p    |
| Low strain (reference) | 808 (3,775)            | 1                 | 1                     |     | 411 (1,467)        | 1                 | 1                     |      |
| Active jobs            | 129 (587)              | 1.0 (0.8–1.3)     | 1.1 (0.9–1.4)         | 0.3 | 128 (395)          | 1.2 (1.0–1.6)     | 1.3 (1.0–1.7)         | 0.02 |
| Passive jobs           | 83 (316)               | 1.3 (1.0–1.7)     | 1.2 (0.9–1.6)         | 0.2 | 62 (185)           | 1.3 (0.9–1.8)     | 1.0 (0.7–1.5)         | 0.9  |
| High strain            | 15 (54)                | 1.4 (0.8–2.6)     | 1.2 (0.6–2.1)         | 0.7 | 23 (46)            | 2.6 (1.4–4.6)     | 1.8 (1.0–3.5)         | 0.07 |

\*Adjusted for adjusted for economic stress

1

1  
2  
3 1 Are job strain and sleep disturbances prognostic factors for neck/shoulder/arm  
4 pain? A cohort study of a general population of working age in Sweden  
5  
6  
7  
8  
9  
10  
11  
12

13 **Authors:**

14  
15 6 *Rasmussen-Barr E<sup>1,2</sup>, Grooten WJA<sup>2</sup>, Hallqvist J<sup>3,4</sup>, Holm LW<sup>1</sup>, Skillgate E<sup>1,5</sup>*  
16

17  
18 <sup>1</sup>Institute of Environmental Medicine, Karolinska Institutet, Box 210, SE-17177, Stockholm,  
19 Sweden  
20

21  
22 <sup>2</sup>Division of Physiotherapy, Department of Neurobiology, Caring Sciences, and Society,  
23 Karolinska Institutet, Huddinge, Sweden  
24

25  
26 <sup>3</sup>Department of Public Health Sciences, Karolinska Universitetssjukhuset, SE-17176,  
27 Stockholm, Sweden  
28

29  
30 <sup>4</sup>Department of Public Health and Caring Sciences, Uppsala University, Box 564, SE-75122,  
31 Uppsala, Sweden  
32

33  
34 <sup>5</sup>Scandinavian College of Naprapathic Manual Medicine, Kräftriket 23A, SE-11419,  
35 Stockholm, Sweden  
36

37  
38 **Corresponding author:**

39  
40 Eva Rasmussen Barr  
41 Institute of Environmental Medicine, Karolinska Institutet  
42 Box 210  
43 SE-17177 Stockholm, Sweden  
44 [eva.rasmussen.barr@ki.se](mailto:eva.rasmussen.barr@ki.se)  
45

46  
47 Word count: 3350  
48

49  
50 Key words: musculoskeletal diseases, prevention, sleep, stress, work  
51  
52

53  
54  
55  
56  
57  
58  
59  
60

1 **ABSTRACT** (word count 221)

2 **Objective** The study whether job strain and sleep disturbances among persons with  
3 *occasional* NSAP are prognostic factors for having experienced at least one episode of  
4 *troublesome* NSAP; and to determine whether sleep disturbances modify the association  
5 between job strain and troublesome NSAP.

6 **Design** Prospective cohort study

7 **Setting** Sweden

8 **Participants** A population-based cohort of individuals with occasional NSAP (n = 6,979)  
9 answered surveys in 2006 and 2010.

10 **Outcome measures** Report of at least one episode of troublesome NSAP in 2010

11 **Results:** The odds ratios for troublesome NSAP at follow-up were in individuals exposed to  
12 passive jobs 1.2 (95% CI 0.9–1.4); to active jobs 1.3 (95% CI 1.1–1.5); to high strain 1.5  
13 (95% CI 1.0–2.4); to mild sleep disturbances 1.4 (95% CI 1.3–1.6); and to severe sleep  
14 disturbances 2.2 (95% CI 1.6–3.0). High strain and active jobs were associated with having  
15 experienced at least one episode of troublesome NSAP the previous six months in persons  
16 with sleep disturbances, but not in individuals without sleep disturbances.

17 **Conclusion:** Our results indicate that high strain, active jobs and sleep disturbances are  
18 prognostic factors that should be taken into account when implementing preventive measures  
19 to minimize the risk of troublesome NSAP among people of working age. We suggest that  
20 sleep disturbances may modify the association between job strain and troublesome  
21 neck/shoulder/arm pain.

22

1  
2  
3 1 **Strengths and limitations**  
4  
5

- 6 2 • This study adds new information to the limited knowledge about factors of importance  
7 3 for the risk of episodes of *troublesome* neck/shoulder/arm pain (NSAP) among  
8 4 working-age individuals who report *occasional* neck pain.  
9 5 • Strength lies in its prospective design based on a general population of working age  
10 6 and the fact that prognostic factors were assessed prior to the outcome.  
11 7 • A further strength is the complete study sample and that several potential confounders  
12 8 were taken into account, even though unmeasured or residual confounding cannot be  
13 9 ruled out.  
14 10 • A limitation of the study is that we lack information about the duration of the  
15 11 exposures prior to baseline or about their occurrence during the four-year follow-up  
16 12 period. This may limit interpretation of the results.  
17 13  
18 14  
19 15  
20 16  
21 17  
22 18  
23 19  
24 20  
25 21  
26 22  
27 23  
28 24  
29 25  
30 26  
31  
32  
33  
34  
35  
36  
37  
38  
39  
40  
41  
42  
43  
44  
45  
46  
47  
48  
49  
50  
51  
52  
53  
54  
55  
56  
57  
58  
59  
60

## 1 INTRODUCTION

2 The prevalence of musculoskeletal pain is overall high.[1] Among workers neck/shoulder/arm  
3 pain (NSAP) is common, causing personal suffering and an economic burden for society.[2-4]  
4 NSAP is a recurrent disorder that follows a course. Remissions, exacerbations, and prior pain  
5 episodes seem to increase the risk of subsequent pain episodes.[5-7] Although most people  
6 will experience neck pain to some degree, not everybody will experience chronic or  
7 troublesome neck pain.[8] Studying modifiable prognostic determinants of NSAP is important  
8 because it may help prevent severe conditions and promote recovery. Several determinants of  
9 the course of pain in the neck/shoulder have been suggested. Results from a cohort study in  
10 Sweden on the long-term prognosis of neck/shoulder pain showed that biomechanical  
11 exposure such as manual handling  $\geq 50\text{N}$  and working with one's hands above shoulder level  
12 negatively influences the prognosis.[9] Further, individuals who take sick leave because of  
13 neck pain, seem to be prone to subsequent episodes of lost time at work and prolonged  
14 disability.[7] A recent study of persons with occasional neck pain reported that social factors  
15 such as economic stress and family income are associated with an increased risk of  
16 development of troublesome neck pain.[10] In addition, work-related factors—physical,  
17 psychological and psychosocial—are considered important for the course of neck/shoulder  
18 pain.[7 11] One widely-used work-related model for various disorders is the job strain model,  
19 also known as the “demand-control model”.[12-15] Here high strain is described as a  
20 combination of high psychological job demands with low job decision latitude. This  
21 extensively studied model[14 16] further defines a combination of high job demands and  
22 high job control as an active job situation, and a combination of low job control and low job  
23 demands as a passive job situation. It has been proposed that workers exposed to job strain  
24 face an increased risk of psychological strain and stress-related diseases.[16-18] Recent

1 research, however, has yielded contradictory results; some studies report a strong association  
2 between high strain and the prognosis of NSAP,[19-20] while others report no associations.[8  
3 21] According to a recent review, several studies on job strain and NSAP are cross-sectional;  
4 thus, no assessment of temporality can be made.[22]

5  
6 **Several factors most likely modify the association between job strain and the trajectory from**  
7 **occasional NSAP to troublesome.** One debated condition which may be associated with the  
8 impact of job strain is exhaustion [17] in terms of prolonged fatigue and sleep  
9 disturbances.[12] While sleep is considered an important part of physical restoration,  
10 curtailment of sleep by itself may be associated with the prognosis of musculoskeletal pain.  
11 Diverse associations between work-related psychological as well as psychosocial factors and  
12 sleep disturbances have been shown.[23-26] However, few studies explore whether sleep  
13 disturbances play a role as an effect-measure modifier for the association between job strain  
14 and the risk of developing NSAP.[12 23]

15  
16 To our knowledge, no longitudinal study has investigated the effects of the exposures job  
17 strain and sleep disturbances in a general population of working age reporting occasional  
18 NSAP at baseline. We therefore sought to study whether these conditions are prognostic  
19 factors for having experienced at least one episode of troublesome NSAP during the previous  
20 six months. **We further sought to explore whether an association between job strain and**  
21 **troublesome NSAP is modified by sleep disturbances.**

## 22 **METHODS**

### 23 **Study design**

1 This longitudinal cohort study is based on the Stockholm Public Health Cohort, (n=25,167), a  
2 population-based cohort set up by the Stockholm County Council to gather information about  
3 the determinants and consequences of significant contributors to the burden of disease.[27]

4 The study was approved by the Regional Ethical Review Board in Stockholm, Sweden (Diary  
5 nr. 2013/497-32).

## 6 Study population

7 Participants aged 18-84 years were selected using area-stratified random samples of the  
8 Stockholm population, an urban region including 24 municipalities with approximately 1.4  
9 million inhabitants (2002). Details about the data collection have been reported  
10 elsewhere.[27] Randomly selected individuals (n = 56,634) (18-84 yrs old) after stratification  
11 for gender and residential area received a baseline postal or web-based questionnaire in 2006.  
12 Sixty-one percent of these (n = 34,707) answered the questionnaire. A total of 25,167 of those  
13 who answered the baseline questionnaire answered a follow-up questionnaire in 2010, and  
14 members of this group constitute Stockholm Public Health Cohort 06/10 (SPHC 06/10). For  
15 the present purpose, only those aged 61 years and below at baseline in SPHC 06/10 were  
16 included in order to limit the study to persons of working age, since the follow-up time was  
17 four years and the official retirement age in Sweden is 65. Those with missing data on the  
18 questions on high job demands, low job control, and sleep were excluded from the cohort (n =  
19 1,212). In addition, those who reported no NSAP or more frequent than occasional at baseline  
20 were excluded (n = 3,789; Fig 1). Thus, the study population comprises persons who reported  
21 occasional NSAP at baseline (n = 6,979). Occasional pain was indicated if participants  
22 responded to the question “During the previous six months, have you experienced pain in  
23 neck, shoulder and/or arms?” with either “Yes, a couple of days in the last six months” or  
24 “Yes, a couple of days each month.”

1  
2  
3 14  
5  
6 2 *Insert Fig 1 about here*7  
8  
9 3 **Figure 1** Flowchart of inclusion process10  
11  
12 4 **Questionnaires**13  
14 5 Baseline data was elicited with questions regarding demographic characteristics, physical and  
15  
16 6 psychological health, physical and psychosocial work environment, lifestyle factors,  
17  
18 7 socioeconomics, social relations, and sick leave. These questions were included in the 2006  
19  
20 8 survey, as reported elsewhere.[27]21  
22 9  
23  
24 10 The potential prognostic factors studied were self-reported job strain; combinations of job  
25  
26 11 demands and job control (high strain, active and passive jobs) and sleep disturbances –  
27  
28 12 reported at baseline.29  
30  
31  
32 13  
33  
34 14 *The Job strain model*35  
36 15 Job demands and job control were categorized according to the job strain model and analysed  
37  
38 16 as follows: (i) low strain (low job demands and high job control), (ii) active jobs (high job  
39  
40 17 demands and high job control), (iii) passive jobs (low job demands and low job control) and  
41  
42 18 (iiii) high strain (high job demands and low job control) (Fig 2). Four questions in the  
43  
44 19 baseline questionnaire were used for this purpose; two about job demands and two about job  
45  
46 20 control. The original Job Content Questionnaire (JQC) has five items on job demand and nine  
47  
48 21 on job control.[28-29] The use of a partial scale compared to a complete, multi-item job-  
49  
50 22 demands-and-control instrument is reportedly feasible, exhibiting high correlations to a  
51  
52 23 complete instrument (Pearson's correlation coefficient,  $r = 0.76-0.88$ ); in addition, the present  
53  
54 24 partial instrument assesses the same underlying concepts as the complete instrument.[30] To



1 test the internal consistency of the four questions used for job strain in the present study,  
2 Cronbach's alpha was calculated for job demands ( $\alpha = 0.53$ ) and job control ( $\alpha = 0.77$ ).

4 The two questions used to measure job demands were:

5 (a) "Do you have enough time to complete your assignments at work?" The answers were  
6 dichotomized into yes (yes, usually/always; yes, sometimes) and no (no, rarely; no, never)

7 (b) "Are there contradictory demands involved in your job?" The answers were dichotomized  
8 into yes (yes, usually/always; yes, sometimes) and no (no, rarely; no, never).

10 The two questions used to measure job control were:

11 (c) "Are you free to decide what needs to be done at work?" The answers were dichotomized  
12 into yes (yes, usually/always; yes, sometimes) and no (no, rarely; no, never).

13 (d) "Are you free to decide how your work is to be carried out?" The answers were  
14 dichotomized into yes (yes, usually/always; yes, sometimes) and no (no, rarely; no, never).

16 Persons with an active job situation had a combination of high job demands (question a=no,  
17 b=yes) and high job control (question c=yes, d=yes). Those with a passive job situation had  
18 a combination of low job demands (question a=yes, b=no) and low job control (question  
19 c=no, d=no) and persons with job strain a combination of high job demands (question a=no,  
20 b=yes) and low control (question c=no, d=no).

22 *Insert fig 2 about here*

24 **Figure 2** The job strain model [14]

1  
2  
3 1 *Sleep disturbances*

4  
5 2 Sleep disturbances were assessed with the question “Do you have difficulty sleeping?” The  
6  
7 3 response options were no; yes, somewhat (classified as mild sleep disturbances); and yes,  
8  
9 4 severe (classified as severe sleep disturbances). The question has been included in the  
10  
11 5 Stockholm Public Health surveys since 2002, to determine longitudinally the prevalence of  
12  
13 6 such disturbances among the population.[31]

14  
15  
16  
17 7 **Outcome**

18  
19 8 The outcome of having experienced an episode of troublesome neck/shoulder/arm pain  
20  
21 9 (NSAP) during the previous six months – was based on two questions in the 2010 follow-up  
22  
23 10 survey. Participants who answered “yes” to both of the following questions were defined as  
24  
25 11 experiencing troublesome NSAP: “During the last six months, have you felt pain in your neck  
26  
27 12 or upper back and/or shoulder or arms? If so, have these restricted your work capacity or  
28  
29 13 hindered you in daily activities to some degree or to a high degree?”  
30  
31  
32

33  
34  
35 15 **Potential confounders**

36  
37 16 Potential confounders were chosen from the baseline survey and guided by knowledge from  
38  
39 17 prior research, and by clinical considerations.[7 32] The potential confounders were age  
40  
41 18 (continuous and <44/>45 years), sex (men/women) smoking habits (daily/not daily), alcohol  
42  
43 19 consumption (sometime during a period of 12 months /no), back pain the previous six months  
44  
45 20 (yes; more than two days), socioeconomic class (unskilled and semiskilled workers, skilled  
46  
47 21 workers, assistant non manual employee, intermediate non-manual employees  
48  
49 22 employed/ self-employed/professional), low support at work from superior (yes), low support  
50  
51 23 at work from colleagues (yes), main physical workload in the past 12 months (sedentary,  
52  
53 24 light, moderately heavy, heavy), time spent on household work per day (yes > 5 hours),  
54  
55  
56  
57  
58  
59  
60

1 economic stress based on the question “Did it happen that during the past 12 months you ran  
2 out of salary/money and had to borrow from relatives or friends in order to pay for food or  
3 rent?” (yes), country of birth (Sweden, elsewhere), and leisure physical activity level  
4 (sedentary < 2 hours per week/active  $\geq$  2 hours per week), sleep disturbances (none or  
5 mild/severe) ; (Table 1).

6  
7 Job strain (low strain, active and passive jobs and high strain) was tested regarding  
8 confounding in the sleep-disturbances model; sleep disturbances were considered to be  
9 potentially in the causal pathway between job strain and episodes of troublesome NSAP.

### 10 11 **Statistical analysis**

12 Numbers and proportions (%) for the variables were used to describe the baseline  
13 characteristics. Logistic regression models were used to assess associations between the  
14 prognostic factors and the outcome. Results are presented as odds ratios (OR), along with  
15 95% confidence intervals (95% CI).

16  
17 Crude associations between (i) active jobs (high job demands/ control) (ii) passive jobs (low  
18 job control/ demands) and (iii) high strain, as discrete factors on one hand, and as a new  
19 episode of troublesome NSAP, on the other, were calculated. Low strain (high job control/  
20 low job demands) served as the reference category. We also calculated crude associations  
21 between sleep disturbances (mild, severe, and none) and troublesome NSAP.

22  
23 Two regression models were built for the analyses: one with the four levels of job strain -  
24 (low strain, active jobs, passive jobs, and high strain) - and one with the three levels of sleep  
25 disturbances (none, mild, severe). For each of the two regression models, potential

1  
2  
3 1 confounding factors were added one at a time to the crude regression model,. If a factor  
4  
5 2 changed the crude OR by 10% or more, it was considered a confounder and was entered into  
6  
7 3 the final model, in accordance with Rothman et al.[33] Finally, we stratified the analyses of  
8  
9 4 job strain and troublesome NSAP by sleep disturbances/no sleep disturbances in a crude and  
10  
11 5 adjusted model in order to study whether the effect of job strain was modified by sleep  
12  
13 6 disturbances.  
14  
15  
16  
17  
18

19 8 The final adjusted model for the exposures active jobs, passive jobs and high strain included  
20  
21 9 the confounders socioeconomic class, work load and support at work from one's superior. In  
22  
23 10 the final adjusted model for sleep disturbances, we included economic stress.  
24

25 11 Statistical analyses used the STATA® statistical software system version 11.  
26  
27  
28  
29

## 30 13 **RESULTS**

31  
32 14 The characteristics of the study population who experience occasional NSAP at baseline (n =  
33  
34 15 6,979) stratified by the categories of the job strain model are presented in Table 1. Sixty-one  
35  
36 16 percent (n = 4,260) of the cohort were women, and 57% (n = 4,006) were aged 18–44 years.  
37  
38 17 Of the cohort, 1,003 persons (14%) reported active jobs at baseline in 2006, 518 (7%)  
39  
40 18 reported passive jobs in 2010 and 100 (2%) reported high strain. In total, 2,137 (31%)  
41  
42 19 reported severe sleep disturbances at baseline. Twenty-four percent (n = 1,659) of the cohort  
43  
44 20 reported troublesome NSAP at follow-up (2010).  
45  
46  
47  
48

49 22 **After control for confounding, high strain and active jobs at baseline were associated with at**  
50  
51 23 **least one episode of troublesome NSAP experienced during the six months prior to follow-up**  
52  
53 24 **in 2010 (Table 2). The adjusted analyses showed an OR of 1.3 (95% CI 1.1–1.5) for active**  
54  
55  
56  
57  
58  
59  
60

1  
2  
3 1 jobs, 1.2 (95% CI 0.9–1.4) for passive jobs, and 1.5 (95% CI 1.0–2.4) for high strain,  
4  
5 2 compared to the reference category low strain.  
6  
7  
8  
9

10 4 Sleep disturbances at baseline were associated with at least one episode of NSAP during the  
11  
12 5 previous six months reported at follow-up (Table 2). The adjusted analysis yielded an OR of  
13  
14 6 1.4 (95% CI 1.3–1.6) for mild sleep disturbances and an OR of 2.2 (95% CI 1.6–3.0) for  
15  
16 7 severe sleep disturbances, compared to the reference category no sleep disturbances.  
17  
18  
19

20  
21 9 *Insert Table 2 here*  
22  
23  
24

25 11 Table 3 shows the results of the stratified analysis. In the stratum *no* sleep disturbances, the  
26  
27 12 adjusted ORs for the association between active and passive jobs at baseline and troublesome  
28  
29 13 NSAP at follow-up were 1.1 (95% CI 0.9–1.4) and 1.2 (95% CI 0.9–1.6), respectively, and for  
30  
31 14 high strain: OR 1.2 (95% CI 0.6–2.1). For the stratum sleep disturbances, the adjusted ORs  
32  
33 15 between active and passive jobs at baseline and troublesome NSAP at follow-up were 1.3  
34  
35 16 (95% CI 1.0–1.7) and 1.0 (95% CI 0.7–1.5), respectively. The OR for high strain was 1.8  
36  
37 17 (95% CI 1.0–3.5).  
38  
39  
40  
41  
42

43 19 *Insert Table 3 here*  
44  
45  
46  
47

## 48 21 **DISCUSSION**

49  
50 22 The present results indicate that active jobs (high job demands/high job control) and high  
51  
52 23 strain (high job demand/low job control), and sleep disturbances, are factors that may be  
53  
54 24 important for having experienced at least one episode of troublesome neck/shoulder/arm pain  
55  
56  
57  
58  
59  
60

1 (NSAP) during the six months prior to follow-up in persons of working age with occasional  
2 NSAP. Further, sleep disturbances seem to modify the prognostic effect of an active job  
3 situation and in addition a high strain situation. As sleep disturbances and NSAP are common  
4 complaints, our findings are important from a public-health perspective.

5  
6 The study population included individuals who reported *occasional* NSAP at baseline, of  
7 whom some subsequently experienced at least one period of *troublesome* pain at follow-up.  
8 Such a prognostic approach in longitudinal studies of the general population has, to date been  
9 but little used.[22] Job strain is a critical psychosocial work-related factor in the development  
10 of harmful work stress and is associated with the risk of several disorders.[18 34-35]

11 However, not all studies recognize job strain as a prognostic factor for NSAP.[9 22 26] The  
12 discrepancy may be explained by sources of bias, different study designs, or varied study  
13 populations; but results may also depend on differing definitions of neck/shoulder pain.[22]

14  
15 Sleep is considered vital to the recovery of body and mind and has been linked to a state of  
16 altered metabolism—changes that, in turn may be linked to e.g. diabetes and cardiovascular  
17 disease.[36-37] In addition, the metabolic changes that result from sleep disturbance are  
18 similar to those related to stress.[36-37] The present study suggests that sleep disturbances act  
19 as a modifier between the prognosis of troublesome NSAP and the impact of job strain.

20 However, Canivet et al. investigated sleep disturbances as a possible mediating factor in the  
21 pathway between job strain and chronic musculoskeletal pain but found no such association.

22 [12] A recent literature review [25] concludes that strong evidence associates especially high  
23 demands at work (active jobs) with severe sleep disturbances. The modifying effect of sleep  
24 disturbances we found may have different explanations, but since we cannot be sure of the  
25 temporality between the onsets of high strain and sleep disturbances, we can only speculate on

1 the associations. It may be that sleep disturbance is a confounder as well as an effect-measure  
2 modifier. Further, it may be that sleep disturbance is a mediator in the causal pathway  
3 between high strain and new periods of troublesome NSAP. If a causal interaction is present,  
4 the risk of developing troublesome NSAP for a person who experiences both high strain or  
5 active jobs and sleeping disturbances may be higher than the sum of the effects of the two  
6 exposures.

### 9 **Strengths and limitations of the study**

10 The strength of the study lies in its prospective design based on a general population of  
11 working age and on the fact that prognostic factors were assessed prior to the outcome. A  
12 further strength is the complete study sample; moreover, several potential confounders were  
13 taken into account, even though we cannot rule out the risk of unmeasured or residual  
14 confounding, for instance from other psychosocial factors like catastrophizing and  
15 somatization.[38]

16  
17 The well-recognized job strain model was used to assess work-related stress.[14][15] A  
18 frequently-used questionnaire developed to measure the construct job strain is the Job Content  
19 Questionnaire (JCQ), [28] which comprises five items addressing job demands and nine  
20 addressing control. In Stockholm Public Health Cohort 06/10, on which the present study is  
21 based, four items from the JCQ were used to measure the constructs. This was judged feasible  
22 based on a reported of consistently high agreement between partial scales measuring job strain  
23 and a complete survey.[30]

24

1  
2  
3 1 A potential limitation is that the lower sensitivity of a shorter scale may increase the risk of  
4  
5 2 non-differential misclassification of exposure (i.e. in this case, the prognostic factors,  
6  
7 3 resulting in a dilution of the true effect). However, the sensitivity of the shorter scales was  
8  
9 4 reported to be high ( $r > 0.94$ ). [30] In addition, low sensitivity of the exposure measure is  
10  
11 5 mainly a problem when the exposure is common, and this is not the case with job strain.  
12  
13 6

14  
15  
16 7 Sleep disturbances were relatively common (31%). They were investigated with a single  
17  
18 8 question, and this may lead to misclassification of this exposure and differential  
19  
20 9 misclassification, thus a dilution of a true effect.  
21  
22  
23 10

24  
25 11 We used logistic regression for the analyses of the associations in the study. Since the  
26  
27 12 outcome (i.e. troublesome NSAP) is relatively common, the calculated OR might be higher  
28  
29 13 than a corresponding relative risk (RR), and the results should not be interpreted as such. We  
30  
31 14 lack information about the duration of the exposures prior to baseline or about the presence of  
32  
33 15 the exposures during the four-year follow-up period. This may limit the interpretation of the  
34  
35 16 results.  
36  
37  
38 17

39  
40  
41 18 Selection bias is a potential threat to validity and may be present if the loss to follow-up  
42  
43 19 differs among participants exposed and unexposed *and* if the loss is also related to the  
44  
45 20 outcome. [33] Additional analyses showed that the proportion of those exposed to job strain  
46  
47 21 and sleeping disturbances differed only marginally between those who completed the follow-  
48  
49 22 up and those who did not. Accordingly, selection bias may not be a problem in this study.  
50  
51

52 23 Job strain may be one of several important factors that influence various disorders and distress  
53  
54 24 — among others, troublesome NSAP. In addition it has been reported recently that there  
55  
56  
57  
58  
59  
60



1 seems to be an association between stress-related factors such as high job demands and high  
2 strain and an overall unhealthy lifestyle.[18]

3  
4 In summary, our results indicate that high strain, active jobs and sleep disturbances may be of  
5 importance for the prognosis of occasional NSAP, in that these factors are associated with  
6 episodes of troublesome NSAP. It is important for employers and caregivers to take reported  
7 high strain, active jobs and sleep disturbances into account when implementing measures to  
8 minimize the risk of troublesome NSAP in workers. Still, additional large prospective studies  
9 are needed to confirm our results and also to identify other modifiable prognostic factors for  
10 this public-health problem.

## 11 12 **CONCLUSION**

13 **Our results indicate that high strain, active jobs and sleep disturbances are prognostic factors**  
14 **that should be taken into account when implementing preventive measures to minimize the**  
15 **risk of troublesome neck/shoulder/arm pain among people of working age. Further, we**  
16 **suggest that sleep disturbances may modify the association between job strain and**  
17 **troublesome neck/shoulder/arm pain.**

## 18 **Acknowledgements**

### 19 *Funding*

20 The Stockholm Public Health Cohort was financed by the Stockholm County Council. All the  
21 authors declare that they have no conflict of interest in connection with this paper. Financial  
22 support for the study was obtained from the AFA Insurance postdoc scholarship.

## 23 24 **License for Publication**

1  
2  
3 1 The corresponding author is entitled to grant on behalf of all the authors, and does grant on  
4 behalf of all the authors, an exclusive license (or non-exclusive for government) on a  
5 2  
6 3 worldwide basis to the BMJ Publishing Group Ltd to permit this article (if accepted) to be  
7 4  
8 4 published in any BMJ PGL products and sublicenses such use and exploitation of all  
9 5  
10 5 subsidiary rights, as set out in our license.  
11 6  
12 6 (<http://group.bmj.com/products/journals/instructions-for-authors/licence-forms>)

13 7 Competing Interest: None declared.  
14 8  
15 8

### 17 9 **Contributors' statement**

20 10 All five authors contributed to the design of the study and to the interpretation of the results.  
21 11  
22 11 ERB and ES conducted the statistical analyses. ERB wrote the first version of the manuscript.  
23 12  
24 12 All the authors critically revised different versions of the manuscript and all read the final  
25 13  
26 13 version.  
27 14  
28 14

### 31 15 **Data sharing statement**

32 16 No additional data available  
33 17  
34 17  
35 17  
36 17  
37 17

### 38 18 **REFERENCES**

- 39 19 1. Picavet HS, Hazes JM. Prevalence of self reported musculoskeletal diseases is high. *Ann Rheum Dis*  
40 20 2003;**62**(7):644-50
- 41 21 2. Feveile H, Jensen C, Burr H. Risk factors for neck-shoulder and wrist-hand symptoms in a 5-year  
42 22 follow-up study of 3,990 employees in Denmark. *Int Arch Occup Environ Health*  
43 23 2002;**75**(4):243-51 doi: 10.1007/s00420-001-0298-9[published Online First: Epub Date]].
- 44 24 3. Cassou B, Derriennic F, Monfort C, Norton J, Touranchet A. Chronic neck and shoulder pain, age,  
45 25 and working conditions: longitudinal results from a large random sample in France. *Occup*  
46 26 *Environ Med* 2002;**59**(8):537-44
- 47 27 4. Skillgate E, Magnusson C, Lundberg M, Hallqvist J. The age- and sex-specific occurrence of  
48 28 bothersome neck pain in the general population - results from the Stockholm public health  
49 29 cohort. *BMC Musculoskelet Disord* 2012;**13**(1):185 doi: 1471-2474-13-185 [pii]  
50 30 10.1186/1471-2474-13-185[published Online First: Epub Date]].
- 51 31 5. Guzman J, Hurwitz EL, Carroll LJ, et al. A new conceptual model of neck pain: linking onset, course,  
52 32 and care: the Bone and Joint Decade 2000-2010 Task Force on Neck Pain and Its Associated  
53 33 Disorders. *Spine (Phila Pa 1976)* 2008;**33**(4 Suppl):S14-23 doi:  
54 34 10.1097/BRS.0b013e3181643efb  
55 35 00007632-200802151-00006 [pii][published Online First: Epub Date]].

- 1  
2  
3 1 6. Carroll LJ, Hogg-Johnson S, van der Velde G, et al. Course and prognostic factors for neck pain in  
4 2 the general population: results of the Bone and Joint Decade 2000-2010 Task Force on Neck  
5 3 Pain and Its Associated Disorders. *Spine (Phila Pa 1976)* 2008;**33**(4 Suppl):S75-82 doi:  
6 4 10.1097/BRS.0b013e31816445be  
7 5 00007632-200802151-00012 [pii][published Online First: Epub Date]].
- 8 6 7. Carroll LJ, Hogg-Johnson S, Cote P, et al. Course and prognostic factors for neck pain in workers:  
9 7 results of the Bone and Joint Decade 2000-2010 Task Force on Neck Pain and Its Associated  
10 8 Disorders. *Spine (Phila Pa 1976)* 2008;**33**(4 Suppl):S93-100 doi:  
11 9 10.1097/BRS.0b013e31816445d4  
12 10 00007632-200802151-00014 [pii][published Online First: Epub Date]].
- 13 11 8. Haldeman S, Carroll LJ, Cassidy JD. The empowerment of people with neck pain: introduction: the  
14 12 Bone and Joint Decade 2000-2010 Task Force on Neck Pain and Its Associated Disorders.  
15 13 *Spine (Phila Pa 1976)* 2008;**33**(4 Suppl):S8-S13 doi: 10.1097/BRS.0b013e3181643f51  
16 14 00007632-200802151-00005 [pii][published Online First: Epub Date]].
- 17 15 9. Grooten WJ, Mulder M, Josephson M, Alfredsson L, Wiktorin C. The influence of work-related  
18 16 exposures on the prognosis of neck/shoulder pain. *Eur Spine J* 2007;**16**(12):2083-91 doi:  
19 17 10.1007/s00586-007-0481-0[published Online First: Epub Date]].
- 20 18 10. Palmlof L, Skillgate E, Alfredsson L, et al. Does income matter for troublesome neck pain? A  
21 19 population-based study on risk and prognosis. *J Epidemiol Community Health*  
22 20 2012;**66**(11):1063-70 doi: jech-2011-200783 [pii]  
23 21 10.1136/jech-2011-200783[published Online First: Epub Date]].
- 24 22 11. Cote P, van der Velde G, Cassidy JD, et al. The burden and determinants of neck pain in workers:  
25 23 results of the Bone and Joint Decade 2000-2010 Task Force on Neck Pain and Its Associated  
26 24 Disorders. *Spine (Phila Pa 1976)* 2008;**33**(4 Suppl):S60-74 doi:  
27 25 10.1097/BRS.0b013e3181643ee4  
28 26 00007632-200802151-00011 [pii][published Online First: Epub Date]].
- 29 27 12. Canivet C, Ostergren PO, Choi B, et al. Sleeping problems as a risk factor for subsequent  
30 28 musculoskeletal pain and the role of job strain: results from a one-year follow-up of the  
31 29 Malmo Shoulder Neck Study Cohort. *Int J Behav Med* 2008;**15**(4):254-62 doi: 905440510 [pii]  
32 30 10.1080/10705500802365466[published Online First: Epub Date]].
- 33 31 13. Ostergren PO, Hanson BS, Balogh I, et al. Incidence of shoulder and neck pain in a working  
34 32 population: effect modification between mechanical and psychosocial exposures at work?  
35 33 Results from a one year follow up of the Malmo shoulder and neck study cohort. *J Epidemiol*  
36 34 *Community Health* 2005;**59**(9):721-8 doi: 59/9/721 [pii]  
37 35 10.1136/jech.2005.034801[published Online First: Epub Date]].
- 38 36 14. Theorell T, Karasek RA. Current issues relating to psychosocial job strain and cardiovascular  
39 37 disease research. *J Occup Health Psychol* 1996;**1**(1):9-26
- 40 38 15. Karasek R. Job demands, job decision latitude, and mental strain: Implications for job redesign.  
41 39 *Adm Sci. Q.* 1979(24):285-307
- 42 40 16. Karasek R, Baker D, Marxer F, Ahlbom A, Theorell T. Job decision latitude, job demands, and  
43 41 cardiovascular disease: a prospective study of Swedish men. *Am J Public Health*  
44 42 1981;**71**(7):694-705
- 45 43 17. Lindeberg SI, Rosvall M, Choi B, et al. Psychosocial working conditions and exhaustion in a  
46 44 working population sample of Swedish middle-aged men and women. *Eur J Public Health*  
47 45 2011;**21**(2):190-6 doi: ckq039 [pii]  
48 46 10.1093/eurpub/ckq039[published Online First: Epub Date]].
- 49 47 18. Heikkila K, Fransson EI, Nyberg ST, et al. Job Strain and Health-Related Lifestyle: Findings From an  
50 48 Individual-Participant Meta-Analysis of 118 000 Working Adults. *Am J Public Health* 2013 doi:  
51 49 10.2105/AJPH.2012.301090[published Online First: Epub Date]].

- 1  
2  
3 1 19. Harcombe H, McBride D, Derrett S, Gray A. Prevalence and impact of musculoskeletal disorders in  
4 2 New Zealand nurses, postal workers and office workers. *Aust N Z J Public Health*  
5 3 2009;**33**(5):437-41 doi: AZPH425 [pii]  
6 4 10.1111/j.1753-6405.2009.00425.x[published Online First: Epub Date]].  
7 5 20. Andersson HI. The course of non-malignant chronic pain: a 12-year follow-up of a cohort from the  
8 6 general population. *Eur J Pain* 2004;**8**(1):47-53 doi: S1090-3801(03)00064-8 [pii]  
9 7 10.1016/S1090-3801(03)00064-8[published Online First: Epub Date]].  
10 8 21. Fredriksson K, Alfredsson L, Ahlberg G, et al. Work environment and neck and shoulder pain: the  
11 9 influence of exposure time. Results from a population based case-control study. *Occup*  
12 10 *Environ Med* 2002;**59**(3):182-8  
13 11 22. Park JK, Jang SH. Association between Upper Extremity Musculoskeletal Disorders and  
14 12 Psychosocial Factors at Work: A Review on the Job DCS Model's Perspective. *Saf Health Work*  
15 13 2010;**1**(1):37-42 doi: 10.5491/SHAW.2010.1.1.37[published Online First: Epub Date]].  
16 14 23. Kaila-Kangas L, Kivimaki M, Harma M, et al. Sleep disturbances as predictors of hospitalization for  
17 15 back disorders-a 28-year follow-up of industrial employees. *Spine (Phila Pa 1976)*  
18 16 2006;**31**(1):51-6 doi: 00007632-200601010-00012 [pii][published Online First: Epub Date]].  
19 17 24. Hoogendoorn WE, Bongers PM, de Vet HC, et al. Psychosocial work characteristics and  
20 18 psychological strain in relation to low-back pain. *Scand J Work Environ Health*  
21 19 2001;**27**(4):258-67 doi: 613 [pii][published Online First: Epub Date]].  
22 20 25. SBU SCoHTA. Arbetsmiljöns betydelse  
23 21 för sömnstörningar. ISBN 978-91-85413-57-7 ed. Stockholm, 2013.  
24 22 26. Hanson LL, Akerstedt T, Naswall K, Leineweber C, Theorell T, Westerlund H. Cross-lagged  
25 23 relationships between workplace demands, control, support, and sleep problems. *Sleep*  
26 24 2011;**34**(10):1403-10 doi: 10.5665/SLEEP.1288[published Online First: Epub Date]].  
27 25 27. Svensson AC, Fredlund P, Laflamme L, et al. Cohort Profile: The Stockholm Public Health Cohort.  
28 26 *Int J Epidemiol* 2012 doi: dys126 [pii]  
29 27 10.1093/ije/dys126[published Online First: Epub Date]].  
30 28 28. Karasek R, Brisson C, Kawakami N, Houtman I, Bongers P, Amick B. The Job Content  
31 29 Questionnaire (JCQ): an instrument for internationally comparative assessments of  
32 30 psychosocial job characteristics. *J Occup Health Psychol* 1998;**3**(4):322-55  
33 31 29. Job Content Questionnaire Rf. (<http://www.jcqcenter.org>)  
34 32 30. Fransson EI, Nyberg ST, Heikkila K, et al. Comparison of alternative versions of the job demand-  
35 33 control scales in 17 European cohort studies: the IPD-Work consortium. *BMC Public Health*  
36 34 2012;**12**:62 doi: 1471-2458-12-62 [pii]  
37 35 10.1186/1471-2458-12-62[published Online First: Epub Date]].  
38 36 31. Folkhälsoinstitut S. Aim and background of questions included in The Swedish Public Health  
39 37 Cohort. ISSN: 1653-0802 2011  
40 38 32. Hogg-Johnson S, van der Velde G, Carroll LJ, et al. The burden and determinants of neck pain in  
41 39 the general population: results of the Bone and Joint Decade 2000-2010 Task Force on Neck  
42 40 Pain and Its Associated Disorders. *J Manipulative Physiol Ther* 2009;**32**(2 Suppl):S46-60 doi:  
43 41 S0161-4754(08)00337-0 [pii]  
44 42 10.1016/j.jmpt.2008.11.010[published Online First: Epub Date]].  
45 43 33. Rothman KJ, Greenland, S. *Introduction to stratified analysis*. 3rd edn ed. Philadelphia: Wolters  
46 44 Kluwer Health/Lippincott Williams&Williams, 2008.  
47 45 34. Heraclides A, Chandola T, Witte DR, Brunner EJ. Psychosocial stress at work doubles the risk of  
48 46 type 2 diabetes in middle-aged women: evidence from the Whitehall II study. *Diabetes Care*  
49 47 2009;**32**(12):2230-5 doi: dc09-0132 [pii]  
50 48 10.2337/dc09-0132[published Online First: Epub Date]].  
51  
52  
53  
54  
55  
56  
57  
58  
59  
60

- 1  
2  
3 1 35. Laszlo KD, Ahnve S, Hallqvist J, Ahlbom A, Janszky I. Job strain predicts recurrent events after a  
4 2 first acute myocardial infarction: the Stockholm Heart Epidemiology Program. *J Intern Med*  
5 3 2010;**267**(6):599-611 doi: JIM2196 [pii]  
6 4 10.1111/j.1365-2796.2009.02196.x[published Online First: Epub Date]].  
7 5 36. Westerlund H, Alexanderson K, Akerstedt T, Magnusson Hanson L, Theorell T, Kivimaki M. Work-  
8 6 related sleep disturbances and sickness absence in the Swedish working population, 1993-  
9 7 1999. *Sleep* 2008;**31**(8):1169-77  
10 8 37. Akerstedt T, Nilsson PM. Sleep as restitution: an introduction. *J Intern Med* 2003;**254**(1):6-12 doi:  
11 9 1195 [pii][published Online First: Epub Date]].  
12 10 38. Karels CH, Bierma-Zeinstra SM, Burdorf A, Verhagen AP, Nauta AP, Koes BW. Social and  
13 11 psychological factors influenced the course of arm, neck and shoulder complaints. *J Clin*  
14 12 *Epidemiol* 2007;**60**(8):839-48 doi: S0895-4356(06)00459-8 [pii]  
15 13 10.1016/j.jclinepi.2006.11.012[published Online First: Epub Date]].  
16 14  
17 15  
18  
19  
20  
21 16  
22  
23  
24 17  
25  
26  
27 18  
28  
29  
30 19  
31  
32  
33 20  
34  
35  
36 21  
37  
38  
39 22  
40  
41  
42 23  
43  
44  
45 24  
46  
47  
48 25  
49  
50  
51 26  
52  
53  
54 27  
55  
56  
57  
58  
59  
60

**Table 1.** Baseline sociodemographic and psychosocial characteristics in the study population of persons with *occasional* neck, shoulder and/or arm pain at baseline (n = 6,979).

|                                                                     | Low strain  |           | Active jobs |           | Passive jobs |           | High strain |           |
|---------------------------------------------------------------------|-------------|-----------|-------------|-----------|--------------|-----------|-------------|-----------|
|                                                                     | (n = 5,358) |           | (n = 1,003) |           | (n = 518)    |           | (n = 100)   |           |
|                                                                     | N           | %         | N           | %         | n            | %         | n           | %         |
| <b>Age</b>                                                          |             |           |             |           |              |           |             |           |
| 18–44                                                               | 2,981       | <b>56</b> | 613         | <b>61</b> | 348          | <b>67</b> | 64          | <b>64</b> |
| 45–61                                                               | 2,377       | <b>44</b> | 390         | <b>39</b> | 170          | <b>33</b> | 36          | <b>36</b> |
| <b>Sex</b>                                                          |             |           |             |           |              |           |             |           |
| Men                                                                 | 2,145       | <b>40</b> | 384         | <b>38</b> | 158          | <b>30</b> | 32          | <b>32</b> |
| Women                                                               | 3,213       | <b>60</b> | 619         | <b>62</b> | 360          | <b>70</b> | 68          | <b>68</b> |
| <b>Country of birth</b>                                             |             |           |             |           |              |           |             |           |
| Sweden                                                              | 4,600       | <b>86</b> | 899         | <b>90</b> | 404          | <b>78</b> | 83          | <b>83</b> |
| Elsewhere                                                           | 758         | <b>14</b> | 104         | <b>10</b> | 114          | <b>22</b> | 17          | <b>17</b> |
| <b>Socioeconomic class*</b>                                         |             |           |             |           |              |           |             |           |
| Unskilled and semiskilled workers                                   | 656         | <b>13</b> | 64          | <b>7</b>  | 162          | <b>34</b> | 33          | <b>35</b> |
| Skilled workers                                                     | 611         | <b>12</b> | 62          | <b>6</b>  | 76           | <b>16</b> | 11          | <b>11</b> |
| Assistant non-manual employees                                      | 778         | <b>15</b> | 107         | <b>11</b> | 108          | <b>23</b> | 12          | <b>12</b> |
| Intermediate non-manual employees                                   | 1,358       | <b>26</b> | 321         | <b>33</b> | 90           | <b>19</b> | 24          | <b>24</b> |
| Employed/self-employed professionals, civil servants and executives | 1,265       | <b>24</b> | 331         | <b>34</b> | 29           | <b>6</b>  | 10          | <b>10</b> |
| Self-employed (other than professionals)                            | 492         | <b>10</b> | 84          | <b>9</b>  | 8            | <b>2</b>  | 4           | <b>4</b>  |
| <b>Sleep disturbances</b>                                           |             |           |             |           |              |           |             |           |
| None or mild                                                        | 3,861       | <b>72</b> | 601         | <b>60</b> | 326          | <b>63</b> | 54          | <b>54</b> |
| Severe                                                              | 1,497       | <b>28</b> | 402         | <b>40</b> | 192          | <b>37</b> | 46          | <b>46</b> |
| <b>Work load</b>                                                    |             |           |             |           |              |           |             |           |
| Sedentary                                                           | 2,207       | <b>41</b> | 464         | <b>46</b> | 192          | <b>37</b> | 36          | <b>36</b> |
| Light                                                               | 1,572       | <b>29</b> | 272         | <b>27</b> | 119          | <b>23</b> | 18          | <b>18</b> |

|                                                      |       |           |     |           |     |           |    |           |
|------------------------------------------------------|-------|-----------|-----|-----------|-----|-----------|----|-----------|
| Moderately heavy                                     | 1,156 | <b>22</b> | 192 | <b>19</b> | 149 | <b>29</b> | 18 | <b>18</b> |
| Heavy                                                | 409   | <b>8</b>  | 74  | <b>7</b>  | 56  | <b>11</b> | 27 | <b>27</b> |
| <b>Low support at work from superior (yes)</b>       | 458   | <b>18</b> | 321 | <b>32</b> | 183 | <b>35</b> | 69 | <b>69</b> |
| <b>Low support at work from colleagues (yes)</b>     | 622   | <b>9</b>  | 150 | <b>15</b> | 71  | <b>14</b> | 20 | <b>20</b> |
| <b>Economic stress (yes)†</b>                        | 367   | <b>7</b>  | 77  | <b>8</b>  | 73  | <b>14</b> | 16 | <b>16</b> |
| <b>Household work</b>                                |       |           |     |           |     |           |    |           |
| >5 hrs./week                                         | 2,135 | <b>40</b> | 456 | <b>45</b> | 183 | <b>36</b> | 39 | <b>39</b> |
| <b>Co-morbidity LBP</b>                              |       |           |     |           |     |           |    |           |
| Yes, 2 days or more often during previous six months | 3,318 | <b>62</b> | 648 | <b>65</b> | 345 | <b>67</b> | 67 | <b>67</b> |
| <b>Smoking habits (daily)</b>                        | 702   | <b>13</b> | 121 | <b>12</b> | 79  | <b>15</b> | 13 | <b>13</b> |
| <b>Alcohol (yes, sometime during last 12 months)</b> | 4,945 | <b>93</b> | 949 | <b>95</b> | 458 | <b>89</b> | 87 | <b>87</b> |
| <b>Leisure physical activity level</b>               |       |           |     |           |     |           |    |           |
| Sedentary < 2hr/week                                 | 477   | <b>9</b>  | 102 | <b>10</b> | 83  | <b>16</b> | 18 | <b>18</b> |
| Active ≥2 hrs./week                                  | 4,877 | <b>91</b> | 895 | <b>89</b> | 432 | <b>84</b> | 81 | <b>81</b> |

\*Socioeconomic class: based on occupation and education † Economic stress (“Did it happen that during the past 12 months you ran out of salary/money and had to borrow from relatives and friends in order to pay for food or rent?”)

1  
2  
3  
4  
5  
6  
7

1  
2  
3 1  
4  
5  
6 2  
7  
8  
9 3  
10  
11  
12 4  
13  
14  
15 5  
16  
17  
18 6  
19  
20  
21 7  
22  
23  
24 8  
25  
26  
27 9  
28  
29  
30 10  
31  
32  
33 11  
34  
35  
36 12  
37  
38  
39 13  
40  
41  
42 14  
43  
44  
45 15  
46  
47  
48 16  
49  
50  
51 17  
52  
53  
54 18  
55  
56  
57  
58  
59  
60

For peer review only



1

**Table 2.** Associations between active jobs (high job demands/high control) and passive jobs (low job control/low job demands), high strain (high job demands/low job control) and sleep disturbances and the risk of experiencing at least one episode of *troublesome* neck/shoulder/arm pain. The associations are presented as crude and adjusted odds ratios (OR) and 95% confidence intervals (95% CI).

| Exposure                               | No.exp.<br>Cases<br>(total) | Crude<br>OR (95% CI) | P     | Adjusted<br>OR (95% CI) | p     |
|----------------------------------------|-----------------------------|----------------------|-------|-------------------------|-------|
| Low strain<br>(reference)              | 1,219<br>(4,023)            | 1                    | -     | 1                       | -     |
| Active jobs                            | 257<br>(725)                | 1.2<br>(1.0–1.4)     | 0.05  | 1.3*<br>(1.1–1.5)       | 0.006 |
| Passive jobs                           | 145<br>(356)                | 1.3<br>(1.1–1.6)     | 0.004 | 1.2*<br>(0.9–1.4)       | 0.2   |
| High strain                            | 38<br>(62)                  | 2.0<br>(1.3–3.0)     | 0.001 | 1.5*<br>(1.0–2.4)       | 0.06  |
| No sleep<br>disturbance<br>(reference) | 1,035<br>(3,697)            | 1                    |       | 1                       |       |
| Mild sleep<br>disturbance              | 547<br>(1,358)              | 1.4<br>(1.3–1.6)     | <0.00 | 1.4‡<br>(1.3–1.6)       | <0.00 |
| Severe sleep<br>disturbance            | 77<br>(111)                 | 2.5<br>(1.8–3.3)     | <0.00 | 2.2‡<br>(1.6–3.0)       | <0.00 |

\*Adjusted for socio-economic class, work load and support from superior, ‡  
adjusted for economic stress

2

3

4

5

**Table 3.** Associations between active jobs (high job demands/high job control), passive jobs (low job control/low job demands), high strain (high job demands/low control) and troublesome neck, shoulder and/or arm pain, stratified for *no* sleep disturbances/ sleep disturbances, presented as crude and adjusted odds ratios (OR) and 95% confidence intervals (95% CI).

| Exposure               | No sleep disturbances  |                   |                       |     | Sleep disturbances |                   |                       | p    |
|------------------------|------------------------|-------------------|-----------------------|-----|--------------------|-------------------|-----------------------|------|
|                        | No. exp. Cases (total) | Crude OR (95% CI) | Adjusted* OR (95% CI) | P   | No. exp. Cases     | Crude OR (95% CI) | Adjusted* OR (95% CI) |      |
| Low strain (reference) | 808 (3,775)            | 1                 | 1                     |     | 411 (1,467)        | 1                 | 1                     |      |
| Active jobs            | 129 (587)              | 1.0 (0.8–1.3)     | 1.1 (0.9–1.4)         | 0.3 | 128 (395)          | 1.2 (1.0–1.6)     | 1.3 (1.0–1.7)         | 0.02 |
| Passive jobs           | 83 (316)               | 1.3 (1.0–1.7)     | 1.2 (0.9–1.6)         | 0.2 | 62 (185)           | 1.3 (0.9–1.8)     | 1.0 (0.7–1.5)         | 0.9  |
| High strain            | 15 (54)                | 1.4 (0.8–2.6)     | 1.2 (0.6–2.1)         | 0.7 | 23 (46)            | 2.6 (1.4–4.6)     | 1.8 (1.0–3.5)         | 0.07 |

\*Adjusted for adjusted for economic stress

1

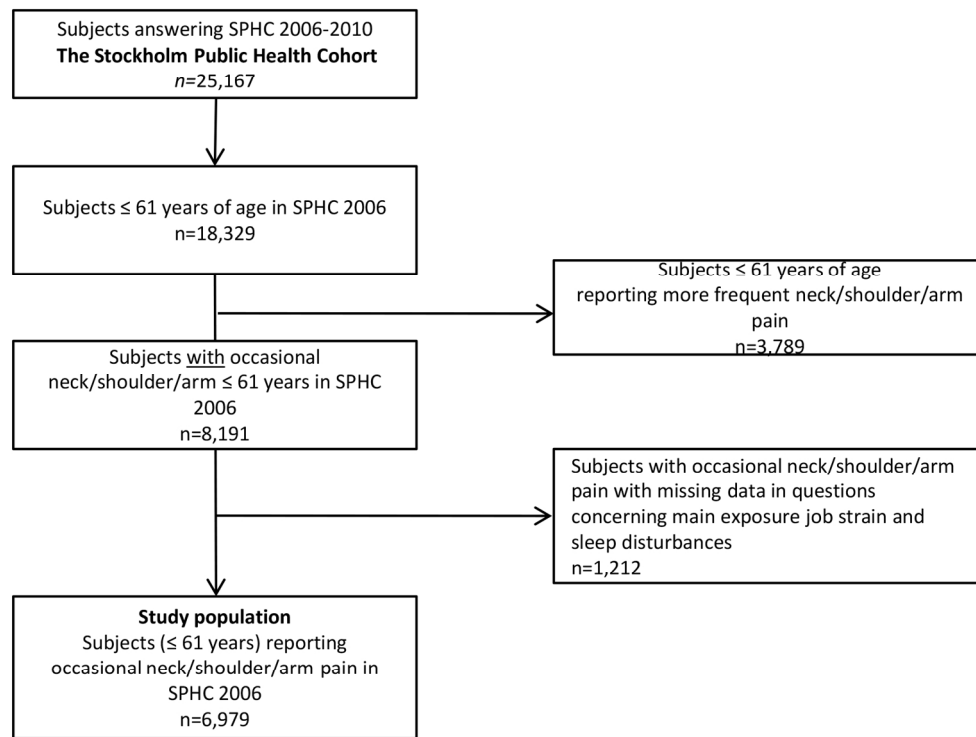

Figure 1 Flowchart of inclusion process  
148x117mm (300 x 300 DPI)

1  
2  
3  
4  
5  
6  
7  
8  
9  
10  
11  
12  
13  
14  
15  
16  
17  
18  
19  
20  
21  
22  
23  
24  
25  
26  
27  
28  
29  
30  
31  
32  
33  
34  
35  
36  
37  
38  
39  
40  
41  
42  
43  
44  
45  
46  
47  
48  
49  
50  
51  
52  
53  
54  
55  
56  
57  
58  
59  
60

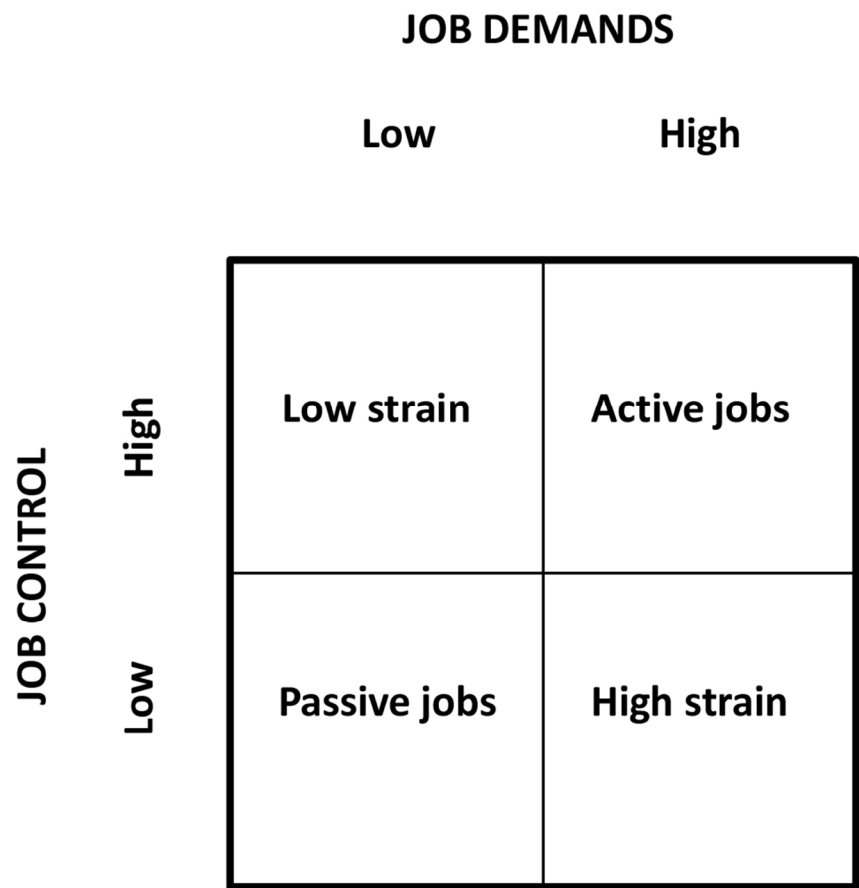

Figure 2 The job strain model [14]  
95x92mm (300 x 300 DPI)

only

## STROBE Statement—checklist of items that should be included in reports of observational studies

|                                                                                                                                        | Item No | Recommendation                                                                                                                                                                             |
|----------------------------------------------------------------------------------------------------------------------------------------|---------|--------------------------------------------------------------------------------------------------------------------------------------------------------------------------------------------|
| <b>Title and abstract</b>                                                                                                              | 1       | (a) Indicate the study's design with a commonly used term in the title or the abstract                                                                                                     |
| a) Cohort study – in title and in abstract                                                                                             |         |                                                                                                                                                                                            |
| b) This is done in the abstract with headings                                                                                          |         | (b) Provide in the abstract an informative and balanced summary of what was done and what was found                                                                                        |
| <b>Introduction</b>                                                                                                                    |         |                                                                                                                                                                                            |
| Background/rationale                                                                                                                   | 2       | Explain the scientific background and rationale for the investigation being reported                                                                                                       |
| This is summarised in the introduction part of the manuscript. Page 2-3.                                                               |         |                                                                                                                                                                                            |
| Objectives                                                                                                                             | 3       | State specific objectives, including any prespecified hypotheses                                                                                                                           |
| The objectives are stated at page 3, line 20-25                                                                                        |         |                                                                                                                                                                                            |
| <b>Methods</b>                                                                                                                         |         |                                                                                                                                                                                            |
| Study design                                                                                                                           | 4       | Present key elements of study design early in the paper                                                                                                                                    |
| The study design is presented at the first line in the method section, Page 3, line 3-6                                                |         |                                                                                                                                                                                            |
| Setting                                                                                                                                | 5       | Describe the setting, locations, and relevant dates, including periods of recruitment, exposure, follow-up, and data collection                                                            |
| This is presented in the methods section Page 4, line 8-15                                                                             |         |                                                                                                                                                                                            |
| Participants                                                                                                                           | 6       | (a) <i>Cohort study</i> —Give the eligibility criteria, and the sources and methods of selection of participants. Describe methods of follow-up                                            |
| a) This is presented in the method section; Page 4, line 15-23 and page 5, line 1-2                                                    |         | <i>Case-control study</i> —Give the eligibility criteria, and the sources and methods of case ascertainment and control selection. Give the rationale for the choice of cases and controls |
| b) Exposed are n= 6979 and unexposed n=1212. This is presented in a flow chart. Figure 1.                                              |         | <i>Cross-sectional study</i> —Give the eligibility criteria, and the sources and methods of selection of participants                                                                      |
|                                                                                                                                        |         | (b) <i>Cohort study</i> —For matched studies, give matching criteria and number of exposed and unexposed                                                                                   |
|                                                                                                                                        |         | <i>Case-control study</i> —For matched studies, give matching criteria and the number of controls per case                                                                                 |
| Variables                                                                                                                              |         | Clearly define all outcomes, exposures, predictors, potential confounders, and effect modifiers. Give diagnostic criteria, if applicable                                                   |
| Outcomes, exposures, potential predictors, potential confounders are presented in the method section page 5, line 5 to page 8, line 37 |         |                                                                                                                                                                                            |
| Data sources/                                                                                                                          | 8       | For each variable of interest, give sources of data and                                                                                                                                    |

|                        |                                                                                                                                                                           |                                                                                                                                                                                                                                                                                                                                                                                                                                                                                                                                                                   |
|------------------------|---------------------------------------------------------------------------------------------------------------------------------------------------------------------------|-------------------------------------------------------------------------------------------------------------------------------------------------------------------------------------------------------------------------------------------------------------------------------------------------------------------------------------------------------------------------------------------------------------------------------------------------------------------------------------------------------------------------------------------------------------------|
| measurement            | This is presented for all outcomes, potential predictors, confounders in the method section page 5, line 5 to page 8, line3*                                              | details of methods of assessment (measurement). Describe comparability of assessment methods if there is more than one group                                                                                                                                                                                                                                                                                                                                                                                                                                      |
| Bias                   | 9<br>Selection bias; page 13, line 12-17, page 14, 12-16<br>Confounding bias, page 9, line 18-21, page 13,line 8-10                                                       | Describe any efforts to address potential sources of bias                                                                                                                                                                                                                                                                                                                                                                                                                                                                                                         |
| Study size             | 10<br>This is presented in flow-chart, Fig 1                                                                                                                              | Explain how the study size was arrived at                                                                                                                                                                                                                                                                                                                                                                                                                                                                                                                         |
| Quantitative variables | 11<br>Page 7, line 1-14,Page 8, line 5 – Page 9, line 3                                                                                                                   | Explain how quantitative variables were handled in the analyses. If applicable, describe which groupings were chosen and why                                                                                                                                                                                                                                                                                                                                                                                                                                      |
| Statistical methods    | 12<br>a)Page 9, line 5 – Page 10, line 5<br>b) Page 9, line 21-24<br>c) Figure 1 and page 14, line 12-16<br>d) Figure 1<br>e) No sensitivity analysis was performed<br>e) | (a) Describe all statistical methods, including those used to control for confounding<br>(b) Describe any methods used to examine subgroups and interactions<br>(c) Explain how missing data were addressed<br>(d) <i>Cohort study</i> —If applicable, explain how loss to follow-up was addressed<br><i>Case-control study</i> —If applicable, explain how matching of cases and controls was addressed<br><i>Cross-sectional study</i> —If applicable, describe analytical methods taking account of sampling strategy<br>(e) Describe any sensitivity analyses |
| <b>Results</b>         |                                                                                                                                                                           |                                                                                                                                                                                                                                                                                                                                                                                                                                                                                                                                                                   |
| Participants           | 13*<br>See flow-chart –Figure 1                                                                                                                                           | (a) Report numbers of individuals at each stage of study—eg numbers potentially eligible, examined for eligibility, confirmed eligible, included in the study, completing follow-up, and analysed<br>(b) Give reasons for non-participation at each stage<br>(c) Consider use of a flow diagram                                                                                                                                                                                                                                                                   |
| Descriptive data       | 14*<br>a) b)Se table 1-3 and flow-chart Fig 1<br>c) Page 5, line 6-22                                                                                                     | (a) Give characteristics of study participants (eg demographic, clinical, social) and information on exposures and potential confounders<br>(b) Indicate number of participants with missing data for each variable of interest<br>(c) <i>Cohort study</i> —Summarise follow-up time (eg, average and total amount)                                                                                                                                                                                                                                               |
| Outcome data           | 15*<br>Page 8, line 5-10,<br>Page 10, line 12-18                                                                                                                          | <i>Cohort study</i> —Report numbers of outcome events or summary measures over time<br><i>Case-control study</i> —Report numbers in each exposure category, or summary measures of exposure                                                                                                                                                                                                                                                                                                                                                                       |

|                          |                                    |  |                                                                                                                                                                                                              |
|--------------------------|------------------------------------|--|--------------------------------------------------------------------------------------------------------------------------------------------------------------------------------------------------------------|
|                          |                                    |  | <i>Cross-sectional study</i> —Report numbers of outcome events or summary measures                                                                                                                           |
| Main results             | 16                                 |  | (a) Give unadjusted estimates and, if applicable, confounder-adjusted estimates and their precision (eg, 95% confidence interval). Make clear which confounders were adjusted for and why they were included |
|                          | Table 2 and 3                      |  | (b) Report category boundaries when continuous variables were categorized                                                                                                                                    |
|                          | Page 10, line 20 – page 11, line 5 |  | (c) If relevant, consider translating estimates of relative risk into absolute risk for a meaningful time period                                                                                             |
|                          | b) N/A                             |  |                                                                                                                                                                                                              |
|                          | c)N/A                              |  |                                                                                                                                                                                                              |
| Other analyses           | 17                                 |  | Report other analyses done—eg analyses of subgroups and interactions, and sensitivity analyses                                                                                                               |
|                          | Table 3                            |  |                                                                                                                                                                                                              |
|                          | Page 11, line 8-14                 |  |                                                                                                                                                                                                              |
| <b>Discussion</b>        |                                    |  |                                                                                                                                                                                                              |
| Key results              | 18                                 |  | Summarise key results with reference to study objectives                                                                                                                                                     |
|                          | Page 11, line 19-23                |  |                                                                                                                                                                                                              |
| Limitations              | 19                                 |  | Discuss limitations of the study, taking into account sources of potential bias or imprecision. Discuss both direction and magnitude of any potential bias                                                   |
|                          | Page 13, line7-Page 14, line 17    |  |                                                                                                                                                                                                              |
| Interpretation           | 20                                 |  | Give a cautious overall interpretation of results considering objectives, limitations, multiplicity of analyses, results from similar studies, and other relevant evidence                                   |
|                          | Page 14, line 19 – Page 14 line 3  |  |                                                                                                                                                                                                              |
|                          | Page 15, line 6-11                 |  |                                                                                                                                                                                                              |
| Generalisability         | 21                                 |  | Discuss the generalisability (external validity) of the study results                                                                                                                                        |
|                          | Page 11, line 19-23                |  |                                                                                                                                                                                                              |
|                          | Page 12, line 1-2                  |  |                                                                                                                                                                                                              |
|                          | Page 14, line 24                   |  |                                                                                                                                                                                                              |
| <b>Other information</b> |                                    |  |                                                                                                                                                                                                              |
| Funding                  | 22                                 |  | Give the source of funding and the role of the funders for the present study and, if applicable, for the original study on which the present article is based                                                |
|                          | Page 15, line 13-15                |  |                                                                                                                                                                                                              |

Continued on next page

1  
2  
3  
4 \*Give information separately for cases and controls in case-control studies and, if applicable, for exposed and  
5 unexposed groups in cohort and cross-sectional studies.  
6  
7

8 **Note:** An Explanation and Elaboration article discusses each checklist item and gives methodological background and  
9 published examples of transparent reporting. The STROBE checklist is best used in conjunction with this article (freely  
10 available on the Web sites of PLoS Medicine at <http://www.plosmedicine.org/>, Annals of Internal Medicine at  
11 <http://www.annals.org/>, and Epidemiology at <http://www.epidem.com/>). Information on the STROBE Initiative is  
12 available at [www.strobe-statement.org](http://www.strobe-statement.org).  
13  
14  
15  
16  
17  
18  
19  
20  
21  
22  
23  
24  
25  
26  
27  
28  
29  
30  
31  
32  
33  
34  
35  
36  
37  
38  
39  
40  
41  
42  
43  
44  
45  
46  
47  
48  
49  
50  
51  
52  
53  
54  
55  
56  
57  
58  
59  
60



# BMJ Open

## Are job Strain and Sleep Disturbances Prognostic Factors for Neck/Shoulder/Arm pain? A Cohort Study of a General Population of Working Age in Sweden

|                                 |                                                                                                                                                                                                                                                                                                                                                                                                                                                                                                                                                                                                                                                                                                              |
|---------------------------------|--------------------------------------------------------------------------------------------------------------------------------------------------------------------------------------------------------------------------------------------------------------------------------------------------------------------------------------------------------------------------------------------------------------------------------------------------------------------------------------------------------------------------------------------------------------------------------------------------------------------------------------------------------------------------------------------------------------|
| Journal:                        | <i>BMJ Open</i>                                                                                                                                                                                                                                                                                                                                                                                                                                                                                                                                                                                                                                                                                              |
| Manuscript ID:                  | bmjopen-2014-005103.R2                                                                                                                                                                                                                                                                                                                                                                                                                                                                                                                                                                                                                                                                                       |
| Article Type:                   | Research                                                                                                                                                                                                                                                                                                                                                                                                                                                                                                                                                                                                                                                                                                     |
| Date Submitted by the Author:   | 11-Jun-2014                                                                                                                                                                                                                                                                                                                                                                                                                                                                                                                                                                                                                                                                                                  |
| Complete List of Authors:       | Rasmussen-Barr, Eva; Karolinska Institutet, Institute of Environmental Medicine; Karolinska Institutet, Division of Physiotherapy, Department of Neurobiology, Caring Sciences, and Society<br>Grooten, Wilhelmus; Karolinska Institutet, Division of Physiotherapy, Department of Neurobiology, Caring Sciences, and Society<br>Hallqvist, Johan; Karolinska Universitetssjukhuset, Department of Public Health Sciences; Uppsala University, Department of Public Health and Caring Sciences<br>Holm, Lena; Karolinska Institutet, Institute of Environmental Medicine<br>Skillgate, Eva; Karolinska Institutet, Institute of Environmental Medicine; Scandinavian College of Naprapathic Manual Medicine, |
| <b>Primary Subject Heading</b>: | Epidemiology                                                                                                                                                                                                                                                                                                                                                                                                                                                                                                                                                                                                                                                                                                 |
| Secondary Subject Heading:      | Occupational and environmental medicine                                                                                                                                                                                                                                                                                                                                                                                                                                                                                                                                                                                                                                                                      |
| Keywords:                       | Musculoskeletal disorders < ORTHOPAEDIC & TRAUMA SURGERY, SLEEP MEDICINE, PREVENTIVE MEDICINE, PRIMARY CARE, REHABILITATION MEDICINE, EPIDEMIOLOGY                                                                                                                                                                                                                                                                                                                                                                                                                                                                                                                                                           |
|                                 |                                                                                                                                                                                                                                                                                                                                                                                                                                                                                                                                                                                                                                                                                                              |

SCHOLARONE™  
Manuscripts

1  
2  
3 1 Are job strain and sleep disturbances prognostic factors for neck/shoulder/arm  
4 pain? A cohort study of a general population of working age in Sweden  
5 2  
6  
7 3  
8  
9 4  
10  
11

12 **Authors:**  
13

14  
15 6 *Rasmussen-Barr E<sup>1,2</sup>, Grooten WJA<sup>2</sup>, Hallqvist J<sup>3,4</sup>, Holm LW<sup>1</sup>, Skillgate E<sup>1,5</sup>*  
16

17  
18 <sup>1</sup>Institute of Environmental Medicine, Karolinska Institutet, Box 210, SE-17177, Stockholm,  
19 Sweden  
20

21  
22 <sup>2</sup>Division of Physiotherapy, Department of Neurobiology, Caring Sciences, and Society,  
23 Karolinska Institutet, Huddinge, Sweden  
24

25  
26 <sup>3</sup>Department of Public Health Sciences, Karolinska Universitetssjukhuset, SE-17176,  
27 Stockholm, Sweden  
28

29  
30 <sup>4</sup>Department of Public Health and Caring Sciences, Uppsala University, Box 564, SE-75122,  
31 Uppsala, Sweden  
32

33  
34 <sup>5</sup>Scandinavian College of Naprapathic Manual Medicine, Kräftriket 23A, SE-11419,  
35 Stockholm, Sweden  
36

37  
38 **Corresponding author:**  
39

40  
41 Eva Rasmussen Barr  
42 Institute of Environmental Medicine, Karolinska Institutet  
43 Box 210  
44 SE-17177 Stockholm, Sweden  
45 [eva.rasmussen.barr@ki.se](mailto:eva.rasmussen.barr@ki.se)  
46

47 Word count: 3350  
48

49 Key words: musculoskeletal diseases, prevention, sleep, stress, work  
50  
51  
52  
53  
54  
55  
56 29  
57  
58  
59  
60

1 **ABSTRACT** (word count 234)

2 **Objective** To study whether job strain, i.e. psychological job demands and decision latitude  
3 and sleep disturbances among persons with *occasional* neck/shoulder/arm pain (NSAP) are  
4 prognostic factors for having experienced at least one episode of *troublesome* NSAP; and to  
5 determine whether sleep disturbances modify the association between job strain and  
6 troublesome NSAP.

7 **Design** Prospective cohort study

8 **Setting** Stockholm, Sweden

9 **Participants** A population-based cohort of individuals with occasional NSAP (n = 6,979)  
10 who answered surveys in 2006 and 2010.

11 **Outcome measures** Report of at least one episode of troublesome NSAP in 2010

12 **Results:** The odds ratios for troublesome NSAP at follow-up were in individuals exposed to  
13 passive jobs 1.2 (95% CI 0.9–1.4); to active jobs 1.3 (95% CI 1.1–1.5); to high strain 1.5  
14 (95% CI 1.0–2.4); to mild sleep disturbances 1.4 (95% CI 1.3–1.6); and to severe sleep  
15 disturbances 2.2 (95% CI 1.6–3.0). High strain and active jobs were associated with having  
16 experienced at least one episode of troublesome NSAP the previous six months in persons  
17 with sleep disturbances, but not in individuals without sleep disturbances.

18 **Conclusion:** Our results indicate that high strain, active jobs and sleep disturbances are  
19 prognostic factors that should be taken into account when implementing preventive measures  
20 to minimize the risk of troublesome NSAP among people of working age. We suggest that  
21 sleep disturbances may modify the association between high strain and troublesome  
22 neck/shoulder/arm pain.

1  
2  
3 1  
4  
5  
6 2  
7  
8  
9 3  
10  
11  
12 4  
13  
14  
15 6  
16 7  
17 8  
18  
19 9  
20 10  
21 11  
22  
23 12  
24 13  
25 14  
26 15  
27 16  
28  
29 17  
30  
31  
32 18  
33  
34  
35 19  
36  
37  
38 20  
39  
40  
41 21  
42  
43  
44 22  
45  
46  
47  
48 23  
49  
50  
51 24  
52  
53  
54 25  
55  
56  
57 26  
58  
59  
60

**Strengths and limitations**

- This study adds new information to the limited knowledge about factors of importance for the risk of episodes of *troublesome* neck/shoulder/arm pain (NSAP) among working-age individuals who report *occasional* neck pain.
- Strength lies in its prospective design based on a general population of working age and the fact that prognostic factors were assessed prior to the outcome.
- A further strength is the complete study sample and that several potential confounders were taken into account, even though unmeasured or residual confounding cannot be ruled out.
- A limitation of the study is that we lack information about the duration of the exposures prior to baseline or about their occurrence during the four-year follow-up period. This may limit interpretation of the results.

1

## 2 INTRODUCTION

3 The prevalence of musculoskeletal pain is overall high.[1] Among workers neck/shoulder/arm  
4 pain (NSAP) is common, causing personal suffering and an economic burden for society.[2-4]  
5 NSAP is a recurrent disorder that follows a course. Remissions, exacerbations, and prior pain  
6 episodes seem to increase the risk of subsequent pain episodes.[5-7] Although most people  
7 will experience neck pain to some degree, not everybody will experience chronic or  
8 troublesome neck pain.[8] Studying modifiable prognostic determinants of NSAP is important  
9 because it may help prevent severe conditions and promote recovery. Several determinants of  
10 the course of pain in the neck/shoulder have been suggested. Results from a cohort study in  
11 Sweden on the long-term prognosis of neck/shoulder pain showed that biomechanical  
12 exposure such as manual handling  $\geq 50\text{N}$  and working with one's hands above shoulder level  
13 negatively influences the prognosis.[9] Further, individuals who take sick leave because of  
14 neck pain seem to be prone to subsequent episodes of lost time at work and prolonged  
15 disability.[7] A recent study of persons with occasional neck pain reported that social factors  
16 such as economic stress and family income are associated with an increased risk of  
17 development of troublesome neck pain.[10] In addition, work-related factors—physical,  
18 psychological and psychosocial—are considered important for the course of neck/shoulder  
19 pain.[7 11] One widely-used work-related model for various disorders is the job strain model,  
20 also known as the “demand-control model”.[12-15] Here high strain is described as a  
21 combination of high psychological job demands with low job decision latitude. This  
22 extensively studied model[14 16] further defines a combination of high job demands and  
23 high job control as an active job situation, and a combination of low job control and low job  
24 demands as a passive job situation. It has been proposed that workers exposed to job strain

1 face an increased risk of psychological strain and stress-related diseases.[16-18] Recent  
2 research, however, has yielded contradictory results; some studies report a strong association  
3 between high strain and the prognosis of NSAP,[19-20] while others report no associations.[8  
4 21] According to a recent review, several studies on job strain and NSAP are cross-sectional;  
5 thus, no assessment of temporality can be made.[22]

6  
7 Several factors most likely modify the association between job strain and the trajectory from  
8 *occasional* NSAP to *troublesome*. One debated condition which may be associated with the  
9 impact of job strain is exhaustion [17] in terms of prolonged fatigue and sleep  
10 disturbances.[12] While sleep is considered an important part of physical restoration,  
11 curtailment of sleep by itself may be associated with the prognosis of musculoskeletal pain.  
12 Diverse associations between work-related psychological as well as psychosocial factors and  
13 sleep disturbances have been shown.[23-26] However, few studies explore whether sleep  
14 disturbances play a role as an effect-measure modifier for the association between job strain  
15 and the risk of developing NSAP.[12 23]

16  
17 To our knowledge, no longitudinal study has investigated the effects of the exposures job  
18 strain and sleep disturbances in a general population of working age reporting occasional  
19 NSAP at baseline. We therefore sought to study whether these conditions are prognostic  
20 factors for having experienced at least one episode of troublesome NSAP during the previous  
21 six months. We further sought to explore whether an association between job strain and  
22 troublesome NSAP is modified by sleep disturbances.

## 23 **METHODS**

### 24 **Study design**

1 This longitudinal cohort study is based on the Stockholm Public Health Cohort, (n=25,167), a  
2 population-based cohort set up by the Stockholm County Council to gather information about  
3 the determinants and consequences of significant contributors to the burden of disease.[27]  
4 The study was approved by the Regional Ethical Review Board in Stockholm, Sweden (Diary  
5 nr. 2013/497-32).

## 6 **Study population**

7 Participants aged 18-84 years were selected using area-stratified random samples of the  
8 Stockholm population, an urban region including 24 municipalities with approximately 1.4  
9 million inhabitants (2002). Details about the data collection have been reported  
10 elsewhere.[27] Randomly selected individuals (n = 56,634) (18-84 yrs old) after stratification  
11 for gender and residential area received a baseline postal or web-based questionnaire in 2006.  
12 Sixty-one percent of these (n = 34,707) answered the questionnaire. A total of 25,167 of those  
13 who answered the baseline questionnaire answered a follow-up questionnaire in 2010, and  
14 members of this group constitute Stockholm Public Health Cohort 06/10 (SPHC 06/10). For  
15 the present purpose, only those aged 61 years and below at baseline in SPHC 06/10 were  
16 included in order to limit the study to persons of working age, since the follow-up time was  
17 four years and the official retirement age in Sweden is 65. Those with missing data on the  
18 questions on high job demands, low job control, and sleep were excluded from the cohort (n =  
19 1,212). In addition, those who reported no NSAP or more frequent than occasional at baseline  
20 were excluded (n = 3,789; Fig 1). Thus, the study population comprises persons who reported  
21 occasional NSAP at baseline (n = 6,979). Occasional pain was indicated if participants  
22 responded to the question “During the previous six months, have you experienced pain in  
23 neck, shoulder and/or arms?” with either “Yes, a couple of days in the last six months” or  
24 “Yes, a couple of days each month.”

1  
2  
3 1  
4  
56 2 *Insert Fig 1 about here*  
7  
89 3 **Figure 1** Flowchart of inclusion process  
1011 4 **Questionnaires**  
12

13  
14 Baseline data was elicited with questions regarding demographic characteristics, physical and  
15  
16 psychological health, physical and psychosocial work environment, lifestyle factors,  
17  
18 socioeconomics, social relations, and sick leave. These questions were included in the 2006  
19  
20 survey, as reported elsewhere.[27]  
21  
22

23 9  
24

25 The potential prognostic factors studied were self-reported job strain; combinations of job  
26  
27 demands and job control (high strain, active and passive jobs) and sleep disturbances –  
28  
29 reported at baseline.  
30  
31

32 13  
3334 14 *The Job strain model*  
35

36 Job demands and job control were categorized according to the job strain model and analysed  
37  
38 as follows: (i) low strain (low job demands and high job control), (ii) active jobs (high job  
39  
40 demands and high job control), (iii) passive jobs (low job demands and low job control) and  
41  
42 (iiii) high strain (high job demands and low job control) (Fig 2). Four questions in the  
43  
44 baseline questionnaire were used for this purpose; two about job demands and two about job  
45  
46 control. The original Job Content Questionnaire (JQC) has five items on job demand and nine  
47  
48 on job control.[28-29] The use of a partial scale compared to a complete, multi-item job-  
49  
50 demands-and-control instrument is reportedly feasible, exhibiting high correlations to a  
51  
52 complete instrument (Pearson's correlation coefficient,  $r = 0.76-0.88$ ); in addition, the present  
53  
54 partial instrument assesses the same underlying concepts as the complete instrument.[30] To  
55  
56  
57  
58  
59  
60



1 test the internal consistency of the four questions used for job strain in the present study,  
2 Cronbach's alpha was calculated for job demands ( $\alpha = 0.53$ ) and job control ( $\alpha = 0.77$ ).

4 The two questions used to measure job demands were:

5 (a) "Do you have enough time to complete your assignments at work?" The answers were  
6 dichotomized into yes (yes, usually/always; yes, sometimes) and no (no, rarely; no, never)

7 (b) "Are there contradictory demands involved in your job?" The answers were dichotomized  
8 into yes (yes, usually/always; yes, sometimes) and no (no, rarely; no, never).

10 The two questions used to measure job control were:

11 (c) "Are you free to decide what needs to be done at work?" The answers were dichotomized  
12 into yes (yes, usually/always; yes, sometimes) and no (no, rarely; no, never).

13 (d) "Are you free to decide how your work is to be carried out?" The answers were  
14 dichotomized into yes (yes, usually/always; yes, sometimes) and no (no, rarely; no, never).

16 Persons with an active job situation had a combination of high job demands (question a=no,  
17 b=yes) and high job control (question c=yes, d=yes). Those with a passive job situation had  
18 a combination of low job demands (question a=yes, b=no) and low job control (question  
19 c=no, d=no) and persons with job strain a combination of high job demands (question a=no,  
20 b=yes) and low control (question c=no, d=no).

22 *Insert fig 2 about here*

24 **Figure 2** The job strain model [14]

1  
2  
3 1 *Sleep disturbances*  
4

5 2 Sleep disturbances were assessed with the question “Do you have difficulty sleeping?” The  
6  
7 3 response options were no; yes, somewhat (classified as mild sleep disturbances); and yes,  
8  
9 4 severe (classified as severe sleep disturbances). Mild and severe sleep disturbances were  
10  
11 5 categorised as sleep disturbances in the stratified analysis. The question has been included in  
12  
13 6 the Stockholm Public Health surveys since 2002, to determine longitudinally the prevalence  
14  
15 7 of such disturbances among the population.[31]  
16  
17  
18  
19

20 8 **Outcome**  
21

22 9 The outcome of having experienced an episode of troublesome neck/shoulder/arm pain  
23  
24 10 (NSAP) during the previous six months – was based on two questions in the 2010 follow-up  
25  
26 11 survey. Participants who answered “yes” to both of the following questions were defined as  
27  
28 12 experiencing troublesome NSAP: “During the last six months, have you felt pain in your neck  
29  
30 13 or upper back and/or shoulder or arms? If so, have these restricted your work capacity or  
31  
32 14 hindered you in daily activities to some degree or to a high degree?”  
33  
34  
35  
36

37 16 **Potential confounders**  
38

39 17 Potential confounders were chosen from the baseline survey and guided by knowledge from  
40  
41 18 prior research, and by clinical considerations.[7 32] The potential confounders were age  
42  
43 19 (continuous and 18-44/45-61 years), sex (men/women) smoking habits (daily), alcohol  
44  
45 20 consumption (sometime during a period of 12 months), back pain the previous six months  
46  
47 21 (yes; more than two days), socioeconomic class (unskilled and semiskilled workers, skilled  
48  
49 22 workers, assistant non manual employee, intermediate non-manual employees  
50  
51 23 employed/ self-employed/professional), low support at work from superior (yes), low support  
52  
53 24 at work from colleagues (yes), main physical workload in the past 12 months (sedentary,  
54  
55  
56  
57  
58  
59  
60

1  
2  
3 1 light, moderately heavy, heavy), time spent on household work per day (yes > 5 hours),  
4  
5 2 economic stress based on the question “Did it happen that during the past 12 months you ran  
6  
7 3 out of salary/money and had to borrow from relatives or friends in order to pay for food or  
8  
9 4 rent?” (yes), country of birth (Sweden, elsewhere), and leisure physical activity level  
10  
11 5 (sedentary < 2 hours per week/active  $\geq$  2 hours per week), sleep disturbances (none or  
12  
13 6 mild/severe) ; (Table 1).  
14  
15  
16  
17  
18  
19

20 8 Job strain (low strain, active and passive jobs and high strain) was tested regarding  
21 9 confounding in the sleep-disturbances model; sleep disturbances were considered to be  
22  
23 10 potentially in the causal pathway between job strain and episodes of troublesome NSAP.  
24  
25  
26  
27

## 28 12 **Statistical analysis**

29 13 Numbers and proportions (%) for the variables were used to describe the baseline  
30  
31 14 characteristics. Logistic regression models were used to assess associations between the  
32  
33 15 prognostic factors and the outcome. Results are presented as odds ratios (OR), along with  
34  
35 16 95% confidence intervals (95% CI).  
36  
37  
38  
39

40 18 Crude associations between (i) active jobs (high job demands/ control) (ii) passive jobs (low  
41  
42 19 job control/ demands) and (iii) high strain, as discrete factors on one hand, and as a new  
43  
44 20 episode of troublesome NSAP, on the other, were calculated. Low strain (high job control/  
45  
46 21 low job demands) served as the reference category. We also calculated crude associations  
47  
48 22 between sleep disturbances (mild, severe, and none) and troublesome NSAP.  
49  
50  
51  
52

53 24 Two regression models were built for the analyses: one with the four levels of job strain -  
54  
55 25 (low strain, active jobs, passive jobs, and high strain) - and one with the three levels of sleep  
56  
57  
58  
59  
60

1  
2  
3 1 disturbances (none, mild, severe). For each of the two regression models, potential  
4  
5 2 confounding factors were added one at a time to the crude regression model,. If a factor  
6  
7 3 changed the crude OR by 10% or more, it was considered a confounder and was entered into  
8  
9 4 the final model, in accordance with Rothman et al.[33] Finally, we stratified the analyses of  
10  
11 5 job strain and troublesome NSAP by sleep disturbances/no sleep disturbances in a crude and  
12  
13 6 adjusted model in order to study whether the effect of job strain was modified by sleep  
14  
15 7 disturbances.  
16  
17 8

18  
19  
20 9 The final adjusted model for the exposures active jobs, passive jobs and high strain included  
21  
22 10 the confounders socioeconomic class, work load and support at work from one's superior. In  
23  
24 11 the final adjusted model for sleep disturbances, we included economic stress.  
25  
26

27 12 Statistical analyses used the STATA® statistical software system version 11.  
28  
29  
30 13

## 31 14 **RESULTS**

32  
33  
34 15 The characteristics of the study population who experience occasional NSAP at baseline (n =  
35  
36 16 6,979) stratified by the categories of the job strain model are presented in Table 1. Sixty-one  
37  
38 17 percent (n = 4,260) of the cohort were women, and 57% (n = 4,006) were aged 18–44 years.  
39  
40 18 Mean age in women was 41 years (SD 11) and in men 42 (SD 11) and did not differ between  
41  
42 19 low strain, passive or active jobs and high strain. Of the cohort, 1,003 persons (14%) reported  
43  
44 20 active jobs at baseline in 2006, 518 (7%) reported passive jobs in 2010 and 100 (2%) reported  
45  
46 21 high strain. In total, 2,137 (31%) reported severe sleep disturbances at baseline. Twenty-four  
47  
48 22 percent (n = 1,659) of the cohort reported troublesome NSAP at follow-up (2010).  
49  
50  
51 23

52  
53  
54 24 After control for confounding, high strain and active jobs at baseline were associated with at  
55  
56 25 least one episode of troublesome NSAP experienced during the six months prior to follow-up  
57  
58  
59  
60

1 in 2010 (Table 2). The adjusted analyses showed an OR of 1.3 (95% CI 1.1–1.5) for active  
2 jobs, 1.2 (95% CI 0.9–1.4) for passive jobs, and 1.5 (95% CI 1.0–2.4) for high strain,  
3 compared to the reference category low strain.

4  
5 Sleep disturbances at baseline were associated with at least one episode of NSAP during the  
6 previous six months reported at follow-up (Table 2). The adjusted analysis yielded an OR of  
7 1.4 (95% CI 1.3–1.6) for mild sleep disturbances and an OR of 2.2 (95% CI 1.6–3.0) for  
8 severe sleep disturbances, compared to the reference category no sleep disturbances.

9  
10 *Insert Table 2 here*

11  
12 Table 3 shows the results of the stratified analysis. In the stratum *no* sleep disturbances, the  
13 adjusted ORs for the association between active and passive jobs at baseline and troublesome  
14 NSAP at follow-up were 1.1 (95% CI 0.9–1.4) and 1.2 (95% CI 0.9–1.6), respectively, and for  
15 high strain: OR 1.2 (95% CI 0.6–2.1). For the stratum sleep disturbances, the adjusted ORs  
16 between active and passive jobs at baseline and troublesome NSAP at follow-up were 1.3  
17 (95% CI 1.0–1.7) and 1.0 (95% CI 0.7–1.5), respectively. The OR for high strain was 1.8  
18 (95% CI 1.0–3.5).

19  
20 *Insert Table 3 here*

## 21 22 **DISCUSSION**

23 The present results indicate that active jobs (high job demands/high job control) and high  
24 strain (high job demand/low job control), and sleep disturbances, are factors that may be

1  
2  
3 1 important for having experienced at least one episode of troublesome neck/shoulder/arm pain  
4  
5 2 (NSAP) during the six months prior to follow-up in persons of working age with occasional  
6  
7 3 NSAP. Further, sleep disturbances seem to modify the prognostic effect of an active job  
8  
9 4 situation and in addition a high strain situation. As sleep disturbances and NSAP are common  
10  
11 5 complaints, our findings are important from a public-health perspective.  
12  
13 6

14  
15  
16 7 The study population included individuals who reported *occasional* NSAP at baseline, of  
17  
18 8 whom some subsequently experienced at least one period of *troublesome* pain at follow-up.  
19  
20 9 Such a prognostic approach in longitudinal studies of the general population has, to date been  
21  
22 10 but little used.[22] Job strain is a critical psychosocial work-related factor in the development  
23  
24 11 of harmful work stress and is associated with the risk of several disorders.[18 34-35]  
25  
26 12 However, not all studies recognize job strain as a prognostic factor for NSAP.[9 22 26] The  
27  
28 13 discrepancy may be explained by sources of bias, different study designs, or varied study  
29  
30 14 populations; but results may also depend on differing definitions of neck/shoulder pain.[22]  
31  
32 15

33  
34  
35  
36 16 Sleep is considered vital to the recovery of body and mind and has been linked to a state of  
37  
38 17 altered metabolism—changes that, in turn may be linked to e.g. diabetes and cardiovascular  
39  
40 18 disease.[36-37] In addition, the metabolic changes that result from sleep disturbance are  
41  
42 19 similar to those related to stress.[36-37] The present study suggests that sleep disturbances act  
43  
44 20 as a modifier between the prognosis of troublesome NSAP and the impact of job strain.

45  
46  
47 21 However, Canivet et al. investigated sleep disturbances as a possible mediating factor in the  
48  
49 22 pathway between job strain and chronic musculoskeletal pain but found no such association.  
50  
51 23 [12] A recent literature review [25] concludes that strong evidence associates especially high  
52  
53 24 demands at work (active jobs) with severe sleep disturbances. The modifying effect of sleep  
54  
55 25 disturbances we found may have different explanations, but since we cannot be sure of the  
56  
57  
58  
59  
60

1  
2  
3 1 temporality between the onsets of high strain and sleep disturbances, we can only speculate on  
4  
5 2 the associations. It may be that sleep disturbance is a confounder as well as an effect-measure  
6  
7 3 modifier. Further, it may be that sleep disturbance is a mediator in the causal pathway  
8  
9 4 between high strain and new periods of troublesome NSAP. If a causal interaction is present,  
10  
11 5 the risk of developing troublesome NSAP for a person who experiences both high strain or  
12  
13 6 active jobs and sleeping disturbances may be higher than the sum of the effects of the two  
14  
15 7 exposures.  
16  
17  
18  
19  
20  
21  
22

### 23 **Strengths and limitations of the study**

24  
25 11 The strength of the study lies in its prospective design based on a general population of  
26  
27 12 working age and on the fact that prognostic factors were assessed prior to the outcome. A  
28  
29 13 further strength is the complete study sample; moreover, several potential confounders were  
30  
31 14 taken into account, even though we cannot rule out the risk of unmeasured or residual  
32  
33 15 confounding, for instance from other psychosocial factors like catastrophizing and  
34  
35 16 somatization.[38]  
36  
37  
38  
39

40 18 The well-recognized job strain model was used to assess work-related stress.[14][15] A  
41  
42 19 frequently-used questionnaire developed to measure the construct job strain is the Job Content  
43  
44 20 Questionnaire (JCQ), [28] which comprises five items addressing job demands and nine  
45  
46 21 addressing control. In Stockholm Public Health Cohort 06/10, on which the present study is  
47  
48 22 based, four items from the JCQ were used to measure the constructs. This was judged feasible  
49  
50 23 based on a reported of consistently high agreement between partial scales measuring job strain  
51  
52 24 and a complete survey.[30]  
53  
54  
55  
56  
57  
58  
59  
60

1  
2  
3 1 A potential limitation is that the lower sensitivity of a shorter scale may increase the risk of  
4  
5 2 non-differential misclassification of exposure (i.e. in this case, the prognostic factors,  
6  
7 3 resulting in a dilution of the true effect). However, the sensitivity of the shorter scales was  
8  
9 4 reported to be high ( $r > 0.94$ ). [30] In addition, low sensitivity of the exposure measure is  
10  
11 5 mainly a problem when the exposure is common, and this is not the case with job strain.  
12  
13 6

14  
15  
16 7 Sleep disturbances were relatively common (31%). They were investigated with a single  
17  
18 8 question, and this may lead to misclassification of this exposure and differential  
19  
20 9 misclassification, thus a dilution of a true effect.  
21  
22 10

23  
24  
25 11 We used logistic regression for the analyses of the associations in the study. Since the  
26  
27 12 outcome (i.e. troublesome NSAP) is relatively common, the calculated OR might be higher  
28  
29 13 than a corresponding relative risk (RR), and the results should not be interpreted as such. We  
30  
31 14 lack information about the duration of the exposures prior to baseline or about the presence of  
32  
33 15 the exposures during the four-year follow-up period. This may limit the interpretation of the  
34  
35 16 results through a misclassification of exposure. Such a misclassification would most probably  
36  
37 17 be non-differential. Some study participants classified as exposed at baseline might after a  
38  
39 18 while be unexposed, and some study participants classified as unexposed at baseline may after  
40  
41 19 a while be exposed, which might result in a dilution of a true association.  
42  
43 20

44  
45  
46  
47 21 Selection bias is a potential threat to validity and may be present if the loss to follow-up  
48  
49 22 differs among participants exposed and unexposed *and* if the loss is also related to the  
50  
51 23 outcome. [33] Additional analyses showed that the proportion of those exposed to job strain  
52  
53 24 and sleeping disturbances differed only marginally between those who completed the follow-  
54  
55 25 up and those who did not. Accordingly, selection bias may not be a problem in this study.  
56  
57  
58  
59  
60



1  
2  
3 1 Job strain may be one of several important factors that influence various disorders and distress  
4  
5 2 — among others, troublesome NSAP. In addition it has been reported recently that there  
6  
7 3 seems to be an association between stress-related factors such as high job demands and high  
8  
9 4 strain and an overall unhealthy lifestyle.[18]  
10  
11  
12 5

13  
14 6 In summary, our results indicate that high strain, active jobs and sleep disturbances may be of  
15  
16 7 importance for the prognosis of occasional NSAP, in that these factors are associated with  
17  
18 8 episodes of troublesome NSAP. It is important for employers and caregivers to take reported  
19  
20 9 high strain, active jobs and sleep disturbances into account when implementing measures to  
21  
22 10 minimize the risk of troublesome NSAP in workers. Still, additional large prospective studies  
23  
24 11 are needed to confirm our results and also to identify other modifiable prognostic factors for  
25  
26 12 this public-health problem.  
27  
28  
29  
30  
31

## 32 **CONCLUSION**

33  
34 15 Our results indicate that high strain, active jobs and sleep disturbances are prognostic factors  
35  
36 16 that should be taken into account when implementing preventive measures to minimize the  
37  
38 17 risk of troublesome neck/shoulder/arm pain among people of working age. Further, we  
39  
40 18 suggest that sleep disturbances may modify the association between high strain and  
41  
42 19 troublesome neck/shoulder/arm pain.  
43  
44  
45  
46  
47  
48  
49  
50  
51  
52  
53  
54  
55  
56  
57  
58  
59  
60

1  
2  
3 **1 Acknowledgements**  
4

5  
6 **2 Funding**  
7

8 The Stockholm Public Health Cohort was financed by the Stockholm County Council. All the  
9 authors declare that they have no conflict of interest in connection with this paper. Financial  
10 support for the study was obtained from the AFA Insurance postdoc scholarship.  
11  
12

13  
14  
15  
16  
17 **7 License for Publication**  
18

19 The corresponding author is entitled to grant on behalf of all the authors, and does grant on  
20 behalf of all the authors, an exclusive license (or non-exclusive for government) on a  
21 worldwide basis to the BMJ Publishing Group Ltd to permit this article (if accepted) to be  
22 published in any BMJ PGL products and sublicenses such use and exploitation of all  
23 subsidiary rights, as set out in our license.  
24

25 (<http://group.bmj.com/products/journals/instructions-for-authors/licence-forms>)  
26

27 Competing Interest: None declared.  
28  
29  
30  
31  
32  
33

34 **16 Contributors' statement**  
35

36 All five authors (ERB, WG, JH, LH, ES) contributed to the design and content of the study  
37 and to the interpretation of the results. ERB and ES conducted the statistical analyses. All the  
38 authors (ERB, WG, JH, LH, ES) critically revised the different versions of the manuscript and  
39 all authors read the final version.  
40  
41  
42  
43  
44  
45

46  
47  
48 **22 Data sharing statement**  
49

50 No additional data available  
51  
52  
53  
54  
55  
56  
57  
58  
59  
60

1  
2  
3 **REFERENCES**

- 4 1. Picavet HS, Hazes JM. Prevalence of self reported musculoskeletal diseases is high. *Ann Rheum Dis*  
5 2003;**62**(7):644-50
- 6 2. Feveile H, Jensen C, Burr H. Risk factors for neck-shoulder and wrist-hand symptoms in a 5-year  
7 follow-up study of 3,990 employees in Denmark. *Int Arch Occup Environ Health*  
8 2002;**75**(4):243-51 doi: 10.1007/s00420-001-0298-9[published Online First: Epub Date]].
- 9 3. Cassou B, Derriennic F, Monfort C, Norton J, Touranchet A. Chronic neck and shoulder pain, age,  
10 and working conditions: longitudinal results from a large random sample in France. *Occup*  
11 *Environ Med* 2002;**59**(8):537-44
- 12 4. Skillgate E, Magnusson C, Lundberg M et al. The age- and sex-specific occurrence of bothersome  
13 neck pain in the general population - results from the Stockholm public health cohort. *BMC*  
14 *Musculoskelet Disord* 2012;**13**(1):185 doi: 1471-2474-13-185 [pii]  
15 10.1186/1471-2474-13-185[published Online First: Epub Date]].
- 16 5. Guzman J, Hurwitz EL, Carroll LJ, et al. A new conceptual model of neck pain: linking onset, course,  
17 and care: the Bone and Joint Decade 2000-2010 Task Force on Neck Pain and Its Associated  
18 Disorders. *Spine (Phila Pa 1976)* 2008;**33**(4 Suppl):S14-23 doi:  
19 10.1097/BRS.0b013e3181643efb  
20 00007632-200802151-00006 [pii][published Online First: Epub Date]].
- 21 6. Carroll LJ, Hogg-Johnson S, van der Velde G, et al. Course and prognostic factors for neck pain in  
22 the general population: results of the Bone and Joint Decade 2000-2010 Task Force on Neck  
23 Pain and Its Associated Disorders. *Spine (Phila Pa 1976)* 2008;**33**(4 Suppl):S75-82 doi:  
24 10.1097/BRS.0b013e31816445be  
25 00007632-200802151-00012 [pii][published Online First: Epub Date]].
- 26 7. Carroll LJ, Hogg-Johnson S, Cote P, et al. Course and prognostic factors for neck pain in workers:  
27 results of the Bone and Joint Decade 2000-2010 Task Force on Neck Pain and Its Associated  
28 Disorders. *Spine (Phila Pa 1976)* 2008;**33**(4 Suppl):S93-100 doi:  
29 10.1097/BRS.0b013e31816445d4  
30 00007632-200802151-00014 [pii][published Online First: Epub Date]].
- 31 8. Haldeman S, Carroll LJ, Cassidy JD. The empowerment of people with neck pain: introduction: the  
32 Bone and Joint Decade 2000-2010 Task Force on Neck Pain and Its Associated Disorders.  
33 *Spine (Phila Pa 1976)* 2008;**33**(4 Suppl):S8-S13 doi: 10.1097/BRS.0b013e3181643f51  
34 00007632-200802151-00005 [pii][published Online First: Epub Date]].
- 35 9. Grooten WJ, Mulder M, Josephson M, Alfredsson L, Wiktorin C. The influence of work-related  
36 exposures on the prognosis of neck/shoulder pain. *Eur Spine J* 2007;**16**(12):2083-91 doi:  
37 10.1007/s00586-007-0481-0[published Online First: Epub Date]].
- 38 10. Palmlof L, Skillgate E, Alfredsson L, et al. Does income matter for troublesome neck pain? A  
39 population-based study on risk and prognosis. *J Epidemiol Community Health*  
40 2012;**66**(11):1063-70 doi: jech-2011-200783 [pii]  
41 10.1136/jech-2011-200783[published Online First: Epub Date]].
- 42 11. Cote P, van der Velde G, Cassidy JD, et al. The burden and determinants of neck pain in workers:  
43 results of the Bone and Joint Decade 2000-2010 Task Force on Neck Pain and Its Associated  
44 Disorders. *Spine (Phila Pa 1976)* 2008;**33**(4 Suppl):S60-74 doi:  
45 10.1097/BRS.0b013e3181643ee4  
46 00007632-200802151-00011 [pii][published Online First: Epub Date]].
- 47 12. Canivet C, Ostergren PO, Choi B, et al. Sleeping problems as a risk factor for subsequent  
48 musculoskeletal pain and the role of job strain: results from a one-year follow-up of the  
49 Malmo Shoulder Neck Study Cohort. *Int J Behav Med* 2008;**15**(4):254-62 doi: 905440510 [pii]  
50 10.1080/10705500802365466[published Online First: Epub Date]].
- 51 13. Ostergren PO, Hanson BS, Balogh I, et al. Incidence of shoulder and neck pain in a working  
52 population: effect modification between mechanical and psychosocial exposures at work?

- 1  
2  
3 1 Results from a one year follow up of the Malmo shoulder and neck study cohort. *J Epidemiol*  
4 2 *Community Health* 2005;**59**(9):721-8 doi: 59/9/721 [pii]  
5 3 10.1136/jech.2005.034801[published Online First: Epub Date] | .  
6 4 14. Theorell T, Karasek RA. Current issues relating to psychosocial job strain and cardiovascular  
7 5 disease research. *J Occup Health Psychol* 1996;**1**(1):9-26  
8 6 15. Karasek R. Job demands, job decision latitude, and mental strain: Implications for job redesign.  
9 7 *Adm Sci. Q.* 1979(24):285-307  
10 8 16. Karasek R, Baker D, Marxer F, et al. Job decision latitude, job demands, and cardiovascular  
11 9 disease: a prospective study of Swedish men. *Am J Public Health* 1981;**71**(7):694-705  
12 10 17. Lindeberg SI, Rosvall M, Choi B, et al. Psychosocial working conditions and exhaustion in a  
13 11 working population sample of Swedish middle-aged men and women. *Eur J Public Health*  
14 12 2011;**21**(2):190-6 doi: ckq039 [pii]  
15 13 10.1093/eurpub/ckq039[published Online First: Epub Date] | .  
16 14 18. Heikkila K, Fransson EI, Nyberg ST, et al. Job Strain and Health-Related Lifestyle: Findings From an  
17 15 Individual-Participant Meta-Analysis of 118 000 Working Adults. *Am J Public Health* 2013 doi:  
18 16 10.2105/AJPH.2012.301090[published Online First: Epub Date] | .  
19 17 19. Harcombe H, McBride D, Derrett S, et al. Prevalence and impact of musculoskeletal disorders in  
20 18 New Zealand nurses, postal workers and office workers. *Aust N Z J Public Health*  
21 19 2009;**33**(5):437-41 doi: AZPH425 [pii]  
22 20 10.1111/j.1753-6405.2009.00425.x[published Online First: Epub Date] | .  
23 21 20. Andersson HI. The course of non-malignant chronic pain: a 12-year follow-up of a cohort from the  
24 22 general population. *Eur J Pain* 2004;**8**(1):47-53 doi: S1090-3801(03)00064-8 [pii]  
25 23 10.1016/S1090-3801(03)00064-8[published Online First: Epub Date] | .  
26 24 21. Fredriksson K, Alfredsson L, Ahlberg G, et al. Work environment and neck and shoulder pain: the  
27 25 influence of exposure time. Results from a population based case-control study. *Occup*  
28 26 *Environ Med* 2002;**59**(3):182-8  
29 27 22. Park JK, Jang SH. Association between Upper Extremity Musculoskeletal Disorders and  
30 28 Psychosocial Factors at Work: A Review on the Job DCS Model's Perspective. *Saf Health Work*  
31 29 2010;**1**(1):37-42 doi: 10.5491/SHAW.2010.1.1.37[published Online First: Epub Date] | .  
32 30 23. Kaila-Kangas L, Kivimaki M, Harma M, et al. Sleep disturbances as predictors of hospitalization for  
33 31 back disorders-a 28-year follow-up of industrial employees. *Spine (Phila Pa 1976)*  
34 32 2006;**31**(1):51-6 doi: 00007632-200601010-00012 [pii][published Online First: Epub Date] | .  
35 33 24. Hoogendoorn WE, Bongers PM, de Vet HC, et al. Psychosocial work characteristics and  
36 34 psychological strain in relation to low-back pain. *Scand J Work Environ Health*  
37 35 2001;**27**(4):258-67 doi: 613 [pii][published Online First: Epub Date] | .  
38 36 25. SBU SCoHTA. Arbetsmiljöns betydelse  
39 37 för sömnstörningar. ISBN 978-91-85413-57-7 ed. Stockholm, 2013.  
40 38 26. Hanson LL, Akerstedt T, Naswall K, et al. Cross-lagged relationships between workplace demands,  
41 39 control, support, and sleep problems. *Sleep* 2011;**34**(10):1403-10 doi:  
42 40 10.5665/SLEEP.1288[published Online First: Epub Date] | .  
43 41 27. Svensson AC, Fredlund P, Laflamme L, et al. Cohort Profile: The Stockholm Public Health Cohort.  
44 42 *Int J Epidemiol* 2012 doi: dys126 [pii]  
45 43 10.1093/ije/dys126[published Online First: Epub Date] | .  
46 44 28. Karasek R, Brisson C, Kawakami N, et al. The Job Content Questionnaire (JCQ): an instrument for  
47 45 internationally comparative assessments of psychosocial job characteristics. *J Occup Health*  
48 46 *Psychol* 1998;**3**(4):322-55  
49 47 29. Job Content Questionnaire Rf. (<http://www.jcqcenter.org>)  
50 48 30. Fransson EI, Nyberg ST, Heikkila K, et al. Comparison of alternative versions of the job demand-  
51 49 control scales in 17 European cohort studies: the IPD-Work consortium. *BMC Public Health*  
52 50 2012;**12**:62 doi: 1471-2458-12-62 [pii]  
53  
54  
55  
56  
57  
58  
59  
60

- 1  
2  
3 1 10.1186/1471-2458-12-62[published Online First: Epub Date] |.  
4 2 31. Folkhälsöinstitut S. Aim and background of questions included in The Swedish Public Health  
5 3 Cohort. ISSN: 1653-0802 2011  
6 4 32. Hogg-Johnson S, van der Velde G, Carroll LJ, et al. The burden and determinants of neck pain in  
7 5 the general population: results of the Bone and Joint Decade 2000-2010 Task Force on Neck  
8 6 Pain and Its Associated Disorders. *J Manipulative Physiol Ther* 2009;**32**(2 Suppl):S46-60 doi:  
9 7 S0161-4754(08)00337-0 [pii]  
10 8 10.1016/j.jmpt.2008.11.010[published Online First: Epub Date] |.  
11 9 33. Rothman KJ, Greenland, S. *Introduction to stratified analysis*. 3rd edn ed. Philadelphia: Wolters  
12 10 Kluwer Health/Lippincott Williams&Williams, 2008.  
13 11 34. Heraclides A, Chandola T, Witte DR, et al. Psychosocial stress at work doubles the risk of type 2  
14 12 diabetes in middle-aged women: evidence from the Whitehall II study. *Diabetes Care*  
15 13 2009;**32**(12):2230-5 doi: dc09-0132 [pii]  
16 14 10.2337/dc09-0132[published Online First: Epub Date] |.  
17 15 35. Laszlo KD, Ahnve S, Hallqvist J, et al. Job strain predicts recurrent events after a first acute  
18 16 myocardial infarction: the Stockholm Heart Epidemiology Program. *J Intern Med*  
19 17 2010;**267**(6):599-611 doi: JIM2196 [pii]  
20 18 10.1111/j.1365-2796.2009.02196.x[published Online First: Epub Date] |.  
21 19 36. Westerlund H, Alexanderson K, Akerstedt T, et al. Work-related sleep disturbances and sickness  
22 20 absence in the Swedish working population, 1993-1999. *Sleep* 2008;**31**(8):1169-77  
23 21 37. Akerstedt T, Nilsson PM. Sleep as restitution: an introduction. *J Intern Med* 2003;**254**(1):6-12 doi:  
24 22 1195 [pii][published Online First: Epub Date] |.  
25 23 38. Karels CH, Bierma-Zeinstra SM, Burdorf A, et al. Social and psychological factors influenced the  
26 24 course of arm, neck and shoulder complaints. *J Clin Epidemiol* 2007;**60**(8):839-48 doi: S0895-  
27 25 4356(06)00459-8 [pii]  
28 26 10.1016/j.jclinepi.2006.11.012[published Online First: Epub Date] |.  
29 27  
30 28  
31 29  
32 30  
33 31  
34 32  
35 33  
36 34  
37 35  
38 36  
39 37  
40 38  
41 39  
42 40  
43 41  
44 42  
45 43  
46 44  
47 45  
48 46  
49 47  
50 48  
51 49  
52 50  
53 51  
54 52  
55 53  
56 54  
57 55  
58 56  
59 57  
60 58

**Table 1.** Baseline sociodemographic and psychosocial characteristics in the study population of persons with occasional neck, shoulder and/or arm pain (NSAP) at baseline (n = 6,979).

|                                                                     | Low strain  |           | Active jobs |           | Passive jobs |           | High strain |           |
|---------------------------------------------------------------------|-------------|-----------|-------------|-----------|--------------|-----------|-------------|-----------|
|                                                                     | (n = 5,358) |           | (n = 1,003) |           | (n = 518)    |           | (n = 100)   |           |
|                                                                     | N           | %         | N           | %         | n            | %         | n           | %         |
| <b>Age (yr)</b>                                                     |             |           |             |           |              |           |             |           |
| Age (yr) 18–44                                                      | 2,981       | <b>56</b> | 613         | <b>61</b> | 348          | <b>67</b> | 64          | <b>64</b> |
| Age (yr) 45–61                                                      | 2,377       | <b>44</b> | 390         | <b>39</b> | 170          | <b>33</b> | 36          | <b>36</b> |
| <b>Sex</b>                                                          |             |           |             |           |              |           |             |           |
| Men                                                                 | 2,145       | <b>40</b> | 384         | <b>38</b> | 158          | <b>30</b> | 32          | <b>32</b> |
| Women                                                               | 3,213       | <b>60</b> | 619         | <b>62</b> | 360          | <b>70</b> | 68          | <b>68</b> |
| <b>Country of birth</b>                                             |             |           |             |           |              |           |             |           |
| Sweden                                                              | 4,600       | <b>86</b> | 899         | <b>90</b> | 404          | <b>78</b> | 83          | <b>83</b> |
| Elsewhere                                                           | 758         | <b>14</b> | 104         | <b>10</b> | 114          | <b>22</b> | 17          | <b>17</b> |
| <b>Socioeconomic class*</b>                                         |             |           |             |           |              |           |             |           |
| Unskilled and semiskilled workers                                   | 656         | <b>13</b> | 64          | <b>7</b>  | 162          | <b>34</b> | 33          | <b>35</b> |
| Skilled workers                                                     | 611         | <b>12</b> | 62          | <b>6</b>  | 76           | <b>16</b> | 11          | <b>11</b> |
| Assistant non-manual employees                                      | 778         | <b>15</b> | 107         | <b>11</b> | 108          | <b>23</b> | 12          | <b>12</b> |
| Intermediate non-manual employees                                   | 1,358       | <b>26</b> | 321         | <b>33</b> | 90           | <b>19</b> | 24          | <b>24</b> |
| Employed/self-employed professionals, civil servants and executives | 1,265       | <b>24</b> | 331         | <b>34</b> | 29           | <b>6</b>  | 10          | <b>10</b> |
| Self-employed (other than professionals)                            | 492         | <b>10</b> | 84          | <b>9</b>  | 8            | <b>2</b>  | 4           | <b>4</b>  |
| <b>Sleep disturbances</b>                                           |             |           |             |           |              |           |             |           |
| None                                                                | 3,861       | <b>72</b> | 601         | <b>60</b> | 326          | <b>63</b> | 54          | <b>54</b> |
| Mild/Severe                                                         | 1,497       | <b>28</b> | 402         | <b>40</b> | 192          | <b>37</b> | 46          | <b>46</b> |
| <b>Work load</b>                                                    |             |           |             |           |              |           |             |           |
| Sedentary                                                           | 2,207       | <b>41</b> | 464         | <b>46</b> | 192          | <b>37</b> | 36          | <b>36</b> |
| Light                                                               | 1,572       | <b>29</b> | 272         | <b>27</b> | 119          | <b>23</b> | 18          | <b>18</b> |

|                                                      |       |           |     |           |     |           |    |           |
|------------------------------------------------------|-------|-----------|-----|-----------|-----|-----------|----|-----------|
| Moderately heavy                                     | 1,156 | <b>22</b> | 192 | <b>19</b> | 149 | <b>29</b> | 18 | <b>18</b> |
| Heavy                                                | 409   | <b>8</b>  | 74  | <b>7</b>  | 56  | <b>11</b> | 27 | <b>27</b> |
| <b>Low support at work from superior (yes)</b>       | 458   | <b>18</b> | 321 | <b>32</b> | 183 | <b>35</b> | 69 | <b>69</b> |
| <b>Low support at work from colleagues (yes)</b>     | 622   | <b>9</b>  | 150 | <b>15</b> | 71  | <b>14</b> | 20 | <b>20</b> |
| <b>Economic stress (yes)†</b>                        | 367   | <b>7</b>  | 77  | <b>8</b>  | 73  | <b>14</b> | 16 | <b>16</b> |
| <b>Household work</b>                                |       |           |     |           |     |           |    |           |
| >5 hrs./week                                         | 2,135 | <b>40</b> | 456 | <b>45</b> | 183 | <b>36</b> | 39 | <b>39</b> |
| <b>Co-morbidity LBP</b>                              |       |           |     |           |     |           |    |           |
| Yes, 2 days or more often during previous six months | 3,318 | <b>62</b> | 648 | <b>65</b> | 345 | <b>67</b> | 67 | <b>67</b> |
| <b>Smoking habits (daily)</b>                        | 702   | <b>13</b> | 121 | <b>12</b> | 79  | <b>15</b> | 13 | <b>13</b> |
| <b>Alcohol (yes, sometime during last 12 months)</b> | 4,945 | <b>93</b> | 949 | <b>95</b> | 458 | <b>89</b> | 87 | <b>87</b> |
| <b>Leisure physical activity level</b>               |       |           |     |           |     |           |    |           |
| Sedentary < 2hr/week                                 | 477   | <b>9</b>  | 102 | <b>10</b> | 83  | <b>16</b> | 18 | <b>18</b> |
| Active ≥2 hrs./week                                  | 4,877 | <b>91</b> | 895 | <b>89</b> | 432 | <b>84</b> | 81 | <b>81</b> |

\*Socioeconomic class: based on occupation and education † Economic stress (“Did it happen that during the past 12 months you ran out of salary/money and had to borrow from relatives and friends in order to pay for food or rent?”)

1

2

3

4

5

6

7

**Table 2.** Associations between active jobs (high job demands/high control) and passive jobs (low job control/low job demands), high strain (high job demands/low job control) and sleep disturbances and the risk of experiencing at least one episode of *troublesome* neck/shoulder/arm pain. The associations are presented as crude and adjusted odds ratios (OR) and 95% confidence intervals (95% CI).

| Exposure                               | No.exp.<br>Cases<br>(total) | Crude<br>OR (95% CI) | P      | Adjusted<br>OR (95% CI) | p      |
|----------------------------------------|-----------------------------|----------------------|--------|-------------------------|--------|
| Low strain<br>(reference)              | 1,219<br>(5,358)            | 1                    | -      | 1                       | -      |
| Active jobs                            | 257<br>(1,003)              | 1.2<br>(1.0–1.4)     | 0.04   | 1.3*<br>(1.1–1.5)       | 0.01   |
| Passive jobs                           | 145<br>(518)                | 1.3<br>(1.1–1.6)     | <0.001 | 1.2*<br>(0.9–1.4)       | ns     |
| High strain                            | 38<br>(100)                 | 2.0<br>(1.3–3.0)     | <0.01  | 1.5*<br>(1.0–2.4)       | ns     |
| No sleep<br>disturbance<br>(reference) | 1,035<br>(4,886)            | 1                    |        | 1                       |        |
| Mild sleep<br>disturbance              | 547<br>(1,905)              | 1.4<br>(1.3–1.6)     | <0.001 | 1.4‡<br>(1.3–1.6)       | <0.001 |
| Severe sleep<br>disturbance            | 77<br>(188)                 | 2.5<br>(1.8–3.3)     | <0.001 | 2.2‡<br>(1.6–3.0)       | <0.001 |

\*Adjusted for socio-economic class, work load and support from superior, ‡  
adjusted for economic stress ns=non significant



**Table 3.** Associations between active jobs (high job demands/high job control), passive jobs (low job control/low job demands), high strain (high job demands/low control) and troublesome neck, shoulder and/or arm pain, stratified for *no* sleep disturbances/ sleep disturbances (mild/severe), presented as crude and adjusted odds ratios (OR) and 95% confidence intervals (95% CI).

| Exposure               | No sleep disturbances  |                   |                       |    | Sleep disturbances     |                   |                       | p    |
|------------------------|------------------------|-------------------|-----------------------|----|------------------------|-------------------|-----------------------|------|
|                        | No. exp. Cases (total) | Crude OR (95% CI) | Adjusted* OR (95% CI) | P  | No. exp. Cases (total) | Crude OR (95% CI) | Adjusted* OR (95% CI) |      |
| Low strain (reference) | 808 (3,890)            | 1                 | 1                     |    | 411 (1,468)            | 1                 | 1                     |      |
| Active jobs            | 129 (597)              | 1.0 (0.8–1.3)     | 1.1 (0.9–1.4)         | ns | 128 (396)              | 1.2 (1.0–1.6)     | 1.3 (1.0–1.7)         | 0.02 |
| Passive jobs           | 83 (336)               | 1.3 (1.0–1.7)     | 1.2 (0.9–1.6)         | ns | 62 (192)               | 1.3 (0.9–1.8)     | 1.0 (0.7–1.5)         | ns   |
| High strain            | 15 (54)                | 1.4 (0.8–2.6)     | 1.2 (0.6–2.1)         | ns | 23 (46)                | 2.6 (1.4–4.6)     | 1.8 (1.0–3.5)         | ns   |

\*Adjusted for adjusted for economic stress, ns=non significant

### 1 Figure legends

2 **Figure 1** Flowchart of inclusion process

3 **Figure 2** The job strain model

1  
2  
3 1 Are job strain and sleep disturbances prognostic factors for neck/shoulder/arm  
4 pain? A cohort study of a general population of working age in Sweden  
5  
6  
7  
8  
9  
10  
11  
12

13 **Authors:**

14  
15 6 *Rasmussen-Barr E<sup>1,2</sup>, Grooten WJA<sup>2</sup>, Hallqvist J<sup>3,4</sup>, Holm LW<sup>1</sup>, Skillgate E<sup>1,5</sup>*  
16

17  
18 <sup>1</sup>Institute of Environmental Medicine, Karolinska Institutet, Box 210, SE-17177, Stockholm,  
19 Sweden  
20

21  
22 <sup>2</sup>Division of Physiotherapy, Department of Neurobiology, Caring Sciences, and Society,  
23 Karolinska Institutet, Huddinge, Sweden  
24

25  
26 <sup>3</sup>Department of Public Health Sciences, Karolinska Universitetssjukhuset, SE-17176,  
27 Stockholm, Sweden  
28

29  
30 <sup>4</sup>Department of Public Health and Caring Sciences, Uppsala University, Box 564, SE-75122,  
31 Uppsala, Sweden  
32

33  
34 <sup>5</sup>Scandinavian College of Naprapathic Manual Medicine, Kräftriket 23A, SE-11419,  
35 Stockholm, Sweden  
36

37  
38 **Corresponding author:**

39  
40 Eva Rasmussen Barr  
41 Institute of Environmental Medicine, Karolinska Institutet  
42 Box 210  
43 SE-17177 Stockholm, Sweden  
44 [eva.rasmussen.barr@ki.se](mailto:eva.rasmussen.barr@ki.se)  
45

46  
47 Word count: 3350  
48

49  
50 Key words: musculoskeletal diseases, prevention, sleep, stress, work  
51  
52

53  
54  
55  
56  
57  
58  
59  
60

1 **ABSTRACT** (word count 234)

2 **Objective** To study whether job strain, i.e. psychological job demands and decision latitude  
3 and sleep disturbances among persons with *occasional* neck/shoulder/arm pain (NSAP) are  
4 prognostic factors for having experienced at least one episode of *troublesome* NSAP; and to  
5 determine whether sleep disturbances modify the association between job strain and  
6 troublesome NSAP.

7 **Design** Prospective cohort study

8 **Setting** Stockholm, Sweden

9 **Participants** A population-based cohort of individuals with occasional NSAP (n = 6,979)  
10 who answered surveys in 2006 and 2010.

11 **Outcome measures** Report of at least one episode of troublesome NSAP in 2010

12 **Results:** The odds ratios for troublesome NSAP at follow-up were in individuals exposed to  
13 passive jobs 1.2 (95% CI 0.9–1.4); to active jobs 1.3 (95% CI 1.1–1.5); to high strain 1.5  
14 (95% CI 1.0–2.4); to mild sleep disturbances 1.4 (95% CI 1.3–1.6); and to severe sleep  
15 disturbances 2.2 (95% CI 1.6–3.0). High strain and active jobs were associated with having  
16 experienced at least one episode of troublesome NSAP the previous six months in persons  
17 with sleep disturbances, but not in individuals without sleep disturbances.

18 **Conclusion:** Our results indicate that high strain, active jobs and sleep disturbances are  
19 prognostic factors that should be taken into account when implementing preventive measures  
20 to minimize the risk of troublesome NSAP among people of working age. We suggest that  
21 sleep disturbances may modify the association between high strain and troublesome  
22 neck/shoulder/arm pain.

1  
2  
3 1  
4  
56 2  
7  
89 3 **Strengths and limitations**  
10

- 11 4 • This study adds new information to the limited knowledge about factors of importance  
12 5 for the risk of episodes of *troublesome* neck/shoulder/arm pain (NSAP) among  
13 6 working-age individuals who report *occasional* neck pain.
  - 14 7 • Strength lies in its prospective design based on a general population of working age  
15 8 and the fact that prognostic factors were assessed prior to the outcome.
  - 16 9 • A further strength is the complete study sample and that several potential confounders  
17 10 were taken into account, even though unmeasured or residual confounding cannot be  
18 11 ruled out.
  - 19 12 • A limitation of the study is that we lack information about the duration of the  
20 13 exposures prior to baseline or about their occurrence during the four-year follow-up  
21 14 period. This may limit interpretation of the results.
- 22 15  
23 16  
24 17  
25 18  
26 19  
27 20  
28 21  
29 22  
30 23  
31 24  
32 25  
33 26  
34 27  
35 28  
36 29  
37 30  
38 31  
39 32  
40 33  
41 34  
42 35  
43 36  
44 37  
45 38  
46 39  
47 40  
48 41  
49 42  
50 43  
51 44  
52 45  
53 46  
54 47  
55 48  
56 49  
57 50  
58 51  
59 52  
60 53

1

## 2 INTRODUCTION

3 The prevalence of musculoskeletal pain is overall high.[1] Among workers neck/shoulder/arm  
4 pain (NSAP) is common, causing personal suffering and an economic burden for society.[2-4]  
5 NSAP is a recurrent disorder that follows a course. Remissions, exacerbations, and prior pain  
6 episodes seem to increase the risk of subsequent pain episodes.[5-7] Although most people  
7 will experience neck pain to some degree, not everybody will experience chronic or  
8 troublesome neck pain.[8] Studying modifiable prognostic determinants of NSAP is important  
9 because it may help prevent severe conditions and promote recovery. Several determinants of  
10 the course of pain in the neck/shoulder have been suggested. Results from a cohort study in  
11 Sweden on the long-term prognosis of neck/shoulder pain showed that biomechanical  
12 exposure such as manual handling  $\geq 50\text{N}$  and working with one's hands above shoulder level  
13 negatively influences the prognosis.[9] Further, individuals who take sick leave because of  
14 neck pain seem to be prone to subsequent episodes of lost time at work and prolonged  
15 disability.[7] A recent study of persons with occasional neck pain reported that social factors  
16 such as economic stress and family income are associated with an increased risk of  
17 development of troublesome neck pain.[10] In addition, work-related factors—physical,  
18 psychological and psychosocial—are considered important for the course of neck/shoulder  
19 pain.[7 11] One widely-used work-related model for various disorders is the job strain model,  
20 also known as the “demand-control model”.[12-15] Here high strain is described as a  
21 combination of high psychological job demands with low job decision latitude. This  
22 extensively studied model[14 16] further defines a combination of high job demands and  
23 high job control as an active job situation, and a combination of low job control and low job  
24 demands as a passive job situation. It has been proposed that workers exposed to job strain

1 face an increased risk of psychological strain and stress-related diseases.[16-18] Recent  
2 research, however, has yielded contradictory results; some studies report a strong association  
3 between high strain and the prognosis of NSAP,[19-20] while others report no associations.[8  
4 21] According to a recent review, several studies on job strain and NSAP are cross-sectional;  
5 thus, no assessment of temporality can be made.[22]

6  
7 Several factors most likely modify the association between job strain and the trajectory from  
8 *occasional* NSAP to *troublesome*. One debated condition which may be associated with the  
9 impact of job strain is exhaustion [17] in terms of prolonged fatigue and sleep  
10 disturbances.[12] While sleep is considered an important part of physical restoration,  
11 curtailment of sleep by itself may be associated with the prognosis of musculoskeletal pain.  
12 Diverse associations between work-related psychological as well as psychosocial factors and  
13 sleep disturbances have been shown.[23-26] However, few studies explore whether sleep  
14 disturbances play a role as an effect-measure modifier for the association between job strain  
15 and the risk of developing NSAP.[12 23]

16  
17 To our knowledge, no longitudinal study has investigated the effects of the exposures job  
18 strain and sleep disturbances in a general population of working age reporting occasional  
19 NSAP at baseline. We therefore sought to study whether these conditions are prognostic  
20 factors for having experienced at least one episode of troublesome NSAP during the previous  
21 six months. We further sought to explore whether an association between job strain and  
22 troublesome NSAP is modified by sleep disturbances.

## 23 **METHODS**

### 24 **Study design**

1 This longitudinal cohort study is based on the Stockholm Public Health Cohort, (n=25,167), a  
2 population-based cohort set up by the Stockholm County Council to gather information about  
3 the determinants and consequences of significant contributors to the burden of disease.[27]  
4 The study was approved by the Regional Ethical Review Board in Stockholm, Sweden (Diary  
5 nr. 2013/497-32).

## 6 **Study population**

7 Participants aged 18-84 years were selected using area-stratified random samples of the  
8 Stockholm population, an urban region including 24 municipalities with approximately 1.4  
9 million inhabitants (2002). Details about the data collection have been reported  
10 elsewhere.[27] Randomly selected individuals (n = 56,634) (18-84 yrs old) after stratification  
11 for gender and residential area received a baseline postal or web-based questionnaire in 2006.  
12 Sixty-one percent of these (n = 34,707) answered the questionnaire. A total of 25,167 of those  
13 who answered the baseline questionnaire answered a follow-up questionnaire in 2010, and  
14 members of this group constitute Stockholm Public Health Cohort 06/10 (SPHC 06/10). For  
15 the present purpose, only those aged 61 years and below at baseline in SPHC 06/10 were  
16 included in order to limit the study to persons of working age, since the follow-up time was  
17 four years and the official retirement age in Sweden is 65. Those with missing data on the  
18 questions on high job demands, low job control, and sleep were excluded from the cohort (n =  
19 1,212). In addition, those who reported no NSAP or more frequent than occasional at baseline  
20 were excluded (n = 3,789; Fig 1). Thus, the study population comprises persons who reported  
21 occasional NSAP at baseline (n = 6,979). Occasional pain was indicated if participants  
22 responded to the question “During the previous six months, have you experienced pain in  
23 neck, shoulder and/or arms?” with either “Yes, a couple of days in the last six months” or  
24 “Yes, a couple of days each month.”

1  
2  
3 14  
5  
6 2 *Insert Fig 1 about here*7  
8  
9 3 **Figure 1** Flowchart of inclusion process10  
11  
12 4 **Questionnaires**13  
14 5 Baseline data was elicited with questions regarding demographic characteristics, physical and  
15  
16 6 psychological health, physical and psychosocial work environment, lifestyle factors,  
17  
18 7 socioeconomics, social relations, and sick leave. These questions were included in the 2006  
19  
20 8 survey, as reported elsewhere.[27]21  
22 9  
23  
24 10 The potential prognostic factors studied were self-reported job strain; combinations of job  
25  
26 11 demands and job control (high strain, active and passive jobs) and sleep disturbances –  
27  
28 12 reported at baseline.29  
30  
31  
32 13  
33  
34 14 *The Job strain model*35  
36 15 Job demands and job control were categorized according to the job strain model and analysed  
37  
38 16 as follows: (i) low strain (low job demands and high job control), (ii) active jobs (high job  
39  
40 17 demands and high job control), (iii) passive jobs (low job demands and low job control) and  
41  
42 18 (iiii) high strain (high job demands and low job control) (Fig 2). Four questions in the  
43  
44 19 baseline questionnaire were used for this purpose; two about job demands and two about job  
45  
46 20 control. The original Job Content Questionnaire (JQC) has five items on job demand and nine  
47  
48 21 on job control.[28-29] The use of a partial scale compared to a complete, multi-item job-  
49  
50 22 demands-and-control instrument is reportedly feasible, exhibiting high correlations to a  
51  
52 23 complete instrument (Pearson's correlation coefficient,  $r = 0.76-0.88$ ); in addition, the present  
53  
54 24 partial instrument assesses the same underlying concepts as the complete instrument.[30] To



1 test the internal consistency of the four questions used for job strain in the present study,  
2 Cronbach's alpha was calculated for job demands ( $\alpha = 0.53$ ) and job control ( $\alpha = 0.77$ ).

4 The two questions used to measure job demands were:

5 (a) "Do you have enough time to complete your assignments at work?" The answers were  
6 dichotomized into yes (yes, usually/always; yes, sometimes) and no (no, rarely; no, never)

7 (b) "Are there contradictory demands involved in your job?" The answers were dichotomized  
8 into yes (yes, usually/always; yes, sometimes) and no (no, rarely; no, never).

10 The two questions used to measure job control were:

11 (c) "Are you free to decide what needs to be done at work?" The answers were dichotomized  
12 into yes (yes, usually/always; yes, sometimes) and no (no, rarely; no, never).

13 (d) "Are you free to decide how your work is to be carried out?" The answers were  
14 dichotomized into yes (yes, usually/always; yes, sometimes) and no (no, rarely; no, never).

16 Persons with an active job situation had a combination of high job demands (question a=no,  
17 b=yes) and high job control (question c=yes, d=yes). Those with a passive job situation had  
18 a combination of low job demands (question a=yes, b=no) and low job control (question  
19 c=no, d=no) and persons with job strain a combination of high job demands (question a=no,  
20 b=yes) and low control (question c=no, d=no).

22 *Insert fig 2 about here*

24 **Figure 2** The job strain model [14]

### 1 *Sleep disturbances*

2 Sleep disturbances were assessed with the question “Do you have difficulty sleeping?” The  
3 response options were no; yes, somewhat (classified as mild sleep disturbances); and yes,  
4 severe (classified as severe sleep disturbances). Mild and severe sleep disturbances were  
5 categorised as sleep disturbances in the stratified analysis. The question has been included in  
6 the Stockholm Public Health surveys since 2002, to determine longitudinally the prevalence  
7 of such disturbances among the population.[31]

### 8 **Outcome**

9 The outcome of having experienced an episode of troublesome neck/shoulder/arm pain  
10 (NSAP) during the previous six months – was based on two questions in the 2010 follow-up  
11 survey. Participants who answered “yes” to both of the following questions were defined as  
12 experiencing troublesome NSAP: “During the last six months, have you felt pain in your neck  
13 or upper back and/or shoulder or arms? If so, have these restricted your work capacity or  
14 hindered you in daily activities to some degree or to a high degree?”

### 15 16 **Potential confounders**

17 Potential confounders were chosen from the baseline survey and guided by knowledge from  
18 prior research, and by clinical considerations.[7 32] The potential confounders were age  
19 (continuous and 18-44/45-61 years), sex (men/women) smoking habits (daily), alcohol  
20 consumption (sometime during a period of 12 months), back pain the previous six months  
21 (yes; more than two days), socioeconomic class (unskilled and semiskilled workers, skilled  
22 workers, assistant non manual employee, intermediate non-manual employees  
23 employed/ self-employed/professional), low support at work from superior (yes), low support  
24 at work from colleagues (yes), main physical workload in the past 12 months (sedentary,

1  
2  
3 1 light, moderately heavy, heavy), time spent on household work per day (yes > 5 hours),  
4  
5 2 economic stress based on the question “Did it happen that during the past 12 months you ran  
6  
7 3 out of salary/money and had to borrow from relatives or friends in order to pay for food or  
8  
9 4 rent?” (yes), country of birth (Sweden, elsewhere), and leisure physical activity level  
10  
11 5 (sedentary < 2 hours per week/active  $\geq$  2 hours per week), sleep disturbances (none or  
12  
13 6 mild/severe) ; (Table 1).  
14  
15  
16  
17  
18  
19

20 8 Job strain (low strain, active and passive jobs and high strain) was tested regarding  
21 9 confounding in the sleep-disturbances model; sleep disturbances were considered to be  
22  
23 10 potentially in the causal pathway between job strain and episodes of troublesome NSAP.  
24  
25  
26  
27

## 28 12 **Statistical analysis**

29 13 Numbers and proportions (%) for the variables were used to describe the baseline  
30  
31 14 characteristics. Logistic regression models were used to assess associations between the  
32  
33 15 prognostic factors and the outcome. Results are presented as odds ratios (OR), along with  
34  
35 16 95% confidence intervals (95% CI).  
36  
37  
38  
39  
40

41 18 Crude associations between (i) active jobs (high job demands/ control) (ii) passive jobs (low  
42  
43 19 job control/ demands) and (iii) high strain, as discrete factors on one hand, and as a new  
44  
45 20 episode of troublesome NSAP, on the other, were calculated. Low strain (high job control/  
46  
47 21 low job demands) served as the reference category. We also calculated crude associations  
48  
49 22 between sleep disturbances (mild, severe, and none) and troublesome NSAP.  
50  
51  
52  
53

54 24 Two regression models were built for the analyses: one with the four levels of job strain -  
55  
56 25 (low strain, active jobs, passive jobs, and high strain) - and one with the three levels of sleep  
57  
58  
59  
60

1  
2  
3 1 disturbances (none, mild, severe). For each of the two regression models, potential  
4  
5 2 confounding factors were added one at a time to the crude regression model,. If a factor  
6  
7 3 changed the crude OR by 10% or more, it was considered a confounder and was entered into  
8  
9 4 the final model, in accordance with Rothman et al.[33] Finally, we stratified the analyses of  
10  
11 5 job strain and troublesome NSAP by sleep disturbances/no sleep disturbances in a crude and  
12  
13 6 adjusted model in order to study whether the effect of job strain was modified by sleep  
14  
15 7 disturbances.  
16  
17 8

18  
19  
20 9 The final adjusted model for the exposures active jobs, passive jobs and high strain included  
21  
22 10 the confounders socioeconomic class, work load and support at work from one's superior. In  
23  
24 11 the final adjusted model for sleep disturbances, we included economic stress.  
25  
26

27 12 Statistical analyses used the STATA® statistical software system version 11.  
28  
29  
30 13

## 31 14 **RESULTS**

32  
33  
34 15 The characteristics of the study population who experience occasional NSAP at baseline (n =  
35  
36 16 6,979) stratified by the categories of the job strain model are presented in Table 1. Sixty-one  
37  
38 17 percent (n = 4,260) of the cohort were women, and 57% (n = 4,006) were aged 18–44 years.

39  
40 18 **Mean age in women was 41 years (SD 11) and in men 42 (SD 11) and did not differ between**  
41  
42 19 **low strain, passive or active jobs and high strain.** Of the cohort, 1,003 persons (14%) reported  
43  
44 20 active jobs at baseline in 2006, 518 (7%) reported passive jobs in 2010 and 100 (2%) reported  
45  
46 21 high strain. In total, 2,137 (31%) reported severe sleep disturbances at baseline. Twenty-four  
47  
48 22 percent (n = 1,659) of the cohort reported troublesome NSAP at follow-up (2010).  
49  
50  
51 23

52  
53  
54 24 After control for confounding, high strain and active jobs at baseline were associated with at  
55  
56 25 least one episode of troublesome NSAP experienced during the six months prior to follow-up  
57  
58  
59  
60

1 in 2010 (Table 2). The adjusted analyses showed an OR of 1.3 (95% CI 1.1–1.5) for active  
2 jobs, 1.2 (95% CI 0.9–1.4) for passive jobs, and 1.5 (95% CI 1.0–2.4) for high strain,  
3 compared to the reference category low strain.

4  
5 Sleep disturbances at baseline were associated with at least one episode of NSAP during the  
6 previous six months reported at follow-up (Table 2). The adjusted analysis yielded an OR of  
7 1.4 (95% CI 1.3–1.6) for mild sleep disturbances and an OR of 2.2 (95% CI 1.6–3.0) for  
8 severe sleep disturbances, compared to the reference category no sleep disturbances.

9  
10 *Insert Table 2 here*

11  
12 Table 3 shows the results of the stratified analysis. In the stratum *no* sleep disturbances, the  
13 adjusted ORs for the association between active and passive jobs at baseline and troublesome  
14 NSAP at follow-up were 1.1 (95% CI 0.9–1.4) and 1.2 (95% CI 0.9–1.6), respectively, and for  
15 high strain: OR 1.2 (95% CI 0.6–2.1). For the stratum sleep disturbances, the adjusted ORs  
16 between active and passive jobs at baseline and troublesome NSAP at follow-up were 1.3  
17 (95% CI 1.0–1.7) and 1.0 (95% CI 0.7–1.5), respectively. The OR for high strain was 1.8  
18 (95% CI 1.0–3.5).

19  
20 *Insert Table 3 here*

## 21 22 **DISCUSSION**

23 The present results indicate that active jobs (high job demands/high job control) and high  
24 strain (high job demand/low job control), and sleep disturbances, are factors that may be

1  
2  
3 1 important for having experienced at least one episode of troublesome neck/shoulder/arm pain  
4  
5 2 (NSAP) during the six months prior to follow-up in persons of working age with occasional  
6  
7 3 NSAP. Further, sleep disturbances seem to modify the prognostic effect of an active job  
8  
9 4 situation and in addition a high strain situation. As sleep disturbances and NSAP are common  
10  
11 5 complaints, our findings are important from a public-health perspective.  
12  
13 6

14  
15  
16 7 The study population included individuals who reported *occasional* NSAP at baseline, of  
17  
18 8 whom some subsequently experienced at least one period of *troublesome* pain at follow-up.  
19  
20 9 Such a prognostic approach in longitudinal studies of the general population has, to date been  
21  
22 10 but little used.[22] Job strain is a critical psychosocial work-related factor in the development  
23  
24 11 of harmful work stress and is associated with the risk of several disorders.[18 34-35]  
25  
26 12 However, not all studies recognize job strain as a prognostic factor for NSAP.[9 22 26] The  
27  
28 13 discrepancy may be explained by sources of bias, different study designs, or varied study  
29  
30 14 populations; but results may also depend on differing definitions of neck/shoulder pain.[22]  
31  
32 15

33  
34  
35  
36 16 Sleep is considered vital to the recovery of body and mind and has been linked to a state of  
37  
38 17 altered metabolism—changes that, in turn may be linked to e.g. diabetes and cardiovascular  
39  
40 18 disease.[36-37] In addition, the metabolic changes that result from sleep disturbance are  
41  
42 19 similar to those related to stress.[36-37] The present study suggests that sleep disturbances act  
43  
44 20 as a modifier between the prognosis of troublesome NSAP and the impact of job strain.

45  
46  
47 21 However, Canivet et al. investigated sleep disturbances as a possible mediating factor in the  
48  
49 22 pathway between job strain and chronic musculoskeletal pain but found no such association.  
50  
51 23 [12] A recent literature review [25] concludes that strong evidence associates especially high  
52  
53 24 demands at work (active jobs) with severe sleep disturbances. The modifying effect of sleep  
54  
55 25 disturbances we found may have different explanations, but since we cannot be sure of the  
56  
57  
58  
59  
60

1  
2  
3 1 temporality between the onsets of high strain and sleep disturbances, we can only speculate on  
4  
5 2 the associations. It may be that sleep disturbance is a confounder as well as an effect-measure  
6  
7 3 modifier. Further, it may be that sleep disturbance is a mediator in the causal pathway  
8  
9 4 between high strain and new periods of troublesome NSAP. If a causal interaction is present,  
10  
11 5 the risk of developing troublesome NSAP for a person who experiences both high strain or  
12  
13 6 active jobs and sleeping disturbances may be higher than the sum of the effects of the two  
14  
15 7 exposures.  
16  
17  
18  
19  
20  
21  
22

### 23 **Strengths and limitations of the study**

24  
25 11 The strength of the study lies in its prospective design based on a general population of  
26  
27 12 working age and on the fact that prognostic factors were assessed prior to the outcome. A  
28  
29 13 further strength is the complete study sample; moreover, several potential confounders were  
30  
31 14 taken into account, even though we cannot rule out the risk of unmeasured or residual  
32  
33 15 confounding, for instance from other psychosocial factors like catastrophizing and  
34  
35 16 somatization.[38]  
36  
37  
38  
39

40 18 The well-recognized job strain model was used to assess work-related stress.[14][15] A  
41  
42 19 frequently-used questionnaire developed to measure the construct job strain is the Job Content  
43  
44 20 Questionnaire (JCQ), [28] which comprises five items addressing job demands and nine  
45  
46 21 addressing control. In Stockholm Public Health Cohort 06/10, on which the present study is  
47  
48 22 based, four items from the JCQ were used to measure the constructs. This was judged feasible  
49  
50 23 based on a reported of consistently high agreement between partial scales measuring job strain  
51  
52 24 and a complete survey.[30]  
53  
54  
55  
56  
57  
58  
59  
60

1  
2  
3 1 A potential limitation is that the lower sensitivity of a shorter scale may increase the risk of  
4  
5 2 non-differential misclassification of exposure (i.e. in this case, the prognostic factors,  
6  
7 3 resulting in a dilution of the true effect). However, the sensitivity of the shorter scales was  
8  
9 4 reported to be high ( $r > 0.94$ ). [30] In addition, low sensitivity of the exposure measure is  
10  
11 5 mainly a problem when the exposure is common, and this is not the case with job strain.  
12  
13 6

14  
15  
16 7 Sleep disturbances were relatively common (31%). They were investigated with a single  
17  
18 8 question, and this may lead to misclassification of this exposure and differential  
19  
20 9 misclassification, thus a dilution of a true effect.  
21  
22 10

23  
24  
25 11 We used logistic regression for the analyses of the associations in the study. Since the  
26  
27 12 outcome (i.e. troublesome NSAP) is relatively common, the calculated OR might be higher  
28  
29 13 than a corresponding relative risk (RR), and the results should not be interpreted as such. We  
30  
31 14 lack information about the duration of the exposures prior to baseline or about the presence of  
32  
33 15 the exposures during the four-year follow-up period. This may limit the interpretation of the  
34  
35 16 results through a misclassification of exposure. Such a misclassification would most probably  
36  
37 17 be non-differential. Some study participants classified as exposed at baseline might after a  
38  
39 18 while be unexposed, and some study participants classified as unexposed at baseline may after  
40  
41 19 a while be exposed, which might result in a dilution of a true association.  
42  
43  
44  
45  
46  
47  
48  
49  
50  
51  
52  
53  
54  
55  
56  
57  
58  
59  
60

21 Selection bias is a potential threat to validity and may be present if the loss to follow-up  
22  
23 differs among participants exposed and unexposed *and* if the loss is also related to the  
24  
25 outcome. [33] Additional analyses showed that the proportion of those exposed to job strain  
and sleeping disturbances differed only marginally between those who completed the follow-  
up and those who did not. Accordingly, selection bias may not be a problem in this study.



1 Job strain may be one of several important factors that influence various disorders and distress  
2 — among others, troublesome NSAP. In addition it has been reported recently that there  
3 seems to be an association between stress-related factors such as high job demands and high  
4 strain and an overall unhealthy lifestyle.[18]

5  
6 In summary, our results indicate that high strain, active jobs and sleep disturbances may be of  
7 importance for the prognosis of occasional NSAP, in that these factors are associated with  
8 episodes of troublesome NSAP. It is important for employers and caregivers to take reported  
9 high strain, active jobs and sleep disturbances into account when implementing measures to  
10 minimize the risk of troublesome NSAP in workers. Still, additional large prospective studies  
11 are needed to confirm our results and also to identify other modifiable prognostic factors for  
12 this public-health problem.

## 13 14 **CONCLUSION**

15 Our results indicate that high strain, active jobs and sleep disturbances are prognostic factors  
16 that should be taken into account when implementing preventive measures to minimize the  
17 risk of troublesome neck/shoulder/arm pain among people of working age. Further, we  
18 suggest that sleep disturbances may modify the association between high strain and  
19 troublesome neck/shoulder/arm pain.

## 20 **Acknowledgements**

### 21 *Funding*

22 The Stockholm Public Health Cohort was financed by the Stockholm County Council. All the  
23 authors declare that they have no conflict of interest in connection with this paper. Financial  
24 support for the study was obtained from the AFA Insurance postdoc scholarship.

1

**2 License for Publication**

3 The corresponding author is entitled to grant on behalf of all the authors, and does grant on  
4 behalf of all the authors, an exclusive license (or non-exclusive for government) on a  
5 worldwide basis to the BMJ Publishing Group Ltd to permit this article (if accepted) to be  
6 published in any BMJ PGL products and sublicenses such use and exploitation of all  
7 subsidiary rights, as set out in our license.

8 (<http://group.bmj.com/products/journals/instructions-for-authors/licence-forms>)

9 Competing Interest: None declared.

10

**11 Contributors' statement**

12 All five authors (ERB, WG, JH, LH, ES) contributed to the design and content of the study  
13 and to the interpretation of the results. ERB and ES conducted the statistical analyses. All the  
14 authors (ERB, WG, JH, LH, ES) critically revised the different versions of the manuscript and  
15 all authors read the final version.

16

**17 Data sharing statement**

18 No additional data available

19

**20 REFERENCES**

- 21 1. Picavet HS, Hazes JM. Prevalence of self reported musculoskeletal diseases is high. *Ann Rheum Dis*  
22 2003;**62**(7):644-50
- 23 2. Feveile H, Jensen C, Burr H. Risk factors for neck-shoulder and wrist-hand symptoms in a 5-year  
24 follow-up study of 3,990 employees in Denmark. *Int Arch Occup Environ Health*  
25 2002;**75**(4):243-51 doi: 10.1007/s00420-001-0298-9[published Online First: Epub Date]].
- 26 3. Cassou B, Derriennic F, Monfort C, Norton J, Touranchet A. Chronic neck and shoulder pain, age,  
27 and working conditions: longitudinal results from a large random sample in France. *Occup*  
28 *Environ Med* 2002;**59**(8):537-44
- 29 4. Skillgate E, Magnusson C, Lundberg M, Hallqvist J. The age- and sex-specific occurrence of  
30 bothersome neck pain in the general population - results from the Stockholm public health  
31 cohort. *BMC Musculoskelet Disord* 2012;**13**(1):185 doi: 1471-2474-13-185 [pii]  
32 10.1186/1471-2474-13-185[published Online First: Epub Date]].

- 1 5. Guzman J, Hurwitz EL, Carroll LJ, et al. A new conceptual model of neck pain: linking onset, course,  
2 and care: the Bone and Joint Decade 2000-2010 Task Force on Neck Pain and Its Associated  
3 Disorders. *Spine (Phila Pa 1976)* 2008;**33**(4 Suppl):S14-23 doi:  
4 10.1097/BRS.0b013e3181643efb  
5 00007632-200802151-00006 [pii][published Online First: Epub Date]].
- 6 6. Carroll LJ, Hogg-Johnson S, van der Velde G, et al. Course and prognostic factors for neck pain in  
7 the general population: results of the Bone and Joint Decade 2000-2010 Task Force on Neck  
8 Pain and Its Associated Disorders. *Spine (Phila Pa 1976)* 2008;**33**(4 Suppl):S75-82 doi:  
9 10.1097/BRS.0b013e31816445be  
10 00007632-200802151-00012 [pii][published Online First: Epub Date]].
- 11 7. Carroll LJ, Hogg-Johnson S, Cote P, et al. Course and prognostic factors for neck pain in workers:  
12 results of the Bone and Joint Decade 2000-2010 Task Force on Neck Pain and Its Associated  
13 Disorders. *Spine (Phila Pa 1976)* 2008;**33**(4 Suppl):S93-100 doi:  
14 10.1097/BRS.0b013e31816445d4  
15 00007632-200802151-00014 [pii][published Online First: Epub Date]].
- 16 8. Haldeman S, Carroll LJ, Cassidy JD. The empowerment of people with neck pain: introduction: the  
17 Bone and Joint Decade 2000-2010 Task Force on Neck Pain and Its Associated Disorders.  
18 *Spine (Phila Pa 1976)* 2008;**33**(4 Suppl):S8-S13 doi: 10.1097/BRS.0b013e3181643f51  
19 00007632-200802151-00005 [pii][published Online First: Epub Date]].
- 20 9. Grooten WJ, Mulder M, Josephson M, Alfredsson L, Wiktorin C. The influence of work-related  
21 exposures on the prognosis of neck/shoulder pain. *Eur Spine J* 2007;**16**(12):2083-91 doi:  
22 10.1007/s00586-007-0481-0[published Online First: Epub Date]].
- 23 10. Palmlof L, Skillgate E, Alfredsson L, et al. Does income matter for troublesome neck pain? A  
24 population-based study on risk and prognosis. *J Epidemiol Community Health*  
25 2012;**66**(11):1063-70 doi: jech-2011-200783 [pii]  
26 10.1136/jech-2011-200783[published Online First: Epub Date]].
- 27 11. Cote P, van der Velde G, Cassidy JD, et al. The burden and determinants of neck pain in workers:  
28 results of the Bone and Joint Decade 2000-2010 Task Force on Neck Pain and Its Associated  
29 Disorders. *Spine (Phila Pa 1976)* 2008;**33**(4 Suppl):S60-74 doi:  
30 10.1097/BRS.0b013e3181643ee4  
31 00007632-200802151-00011 [pii][published Online First: Epub Date]].
- 32 12. Canivet C, Ostergren PO, Choi B, et al. Sleeping problems as a risk factor for subsequent  
33 musculoskeletal pain and the role of job strain: results from a one-year follow-up of the  
34 Malmo Shoulder Neck Study Cohort. *Int J Behav Med* 2008;**15**(4):254-62 doi: 905440510 [pii]  
35 10.1080/10705500802365466[published Online First: Epub Date]].
- 36 13. Ostergren PO, Hanson BS, Balogh I, et al. Incidence of shoulder and neck pain in a working  
37 population: effect modification between mechanical and psychosocial exposures at work?  
38 Results from a one year follow up of the Malmo shoulder and neck study cohort. *J Epidemiol*  
39 *Community Health* 2005;**59**(9):721-8 doi: 59/9/721 [pii]  
40 10.1136/jech.2005.034801[published Online First: Epub Date]].
- 41 14. Theorell T, Karasek RA. Current issues relating to psychosocial job strain and cardiovascular  
42 disease research. *J Occup Health Psychol* 1996;**1**(1):9-26
- 43 15. Karasek R. Job demands, job decision latitude, and mental strain: Implications for job redesign.  
44 *Adm Sci. Q.* 1979(24):285-307
- 45 16. Karasek R, Baker D, Marxer F, Ahlbom A, Theorell T. Job decision latitude, job demands, and  
46 cardiovascular disease: a prospective study of Swedish men. *Am J Public Health*  
47 1981;**71**(7):694-705
- 48 17. Lindeberg SI, Rosvall M, Choi B, et al. Psychosocial working conditions and exhaustion in a  
49 working population sample of Swedish middle-aged men and women. *Eur J Public Health*  
50 2011;**21**(2):190-6 doi: ckq039 [pii]

- 1  
2  
3 1 10.1093/eurpub/ckq039[published Online First: Epub Date]].  
4 2 18. Heikkila K, Fransson EI, Nyberg ST, et al. Job Strain and Health-Related Lifestyle: Findings From an  
5 3 Individual-Participant Meta-Analysis of 118 000 Working Adults. *Am J Public Health* 2013 doi:  
6 4 10.2105/AJPH.2012.301090[published Online First: Epub Date]].  
7 5 19. Harcombe H, McBride D, Derrett S, Gray A. Prevalence and impact of musculoskeletal disorders in  
8 6 New Zealand nurses, postal workers and office workers. *Aust N Z J Public Health*  
9 7 2009;**33**(5):437-41 doi: AZPH425 [pii]  
10 8 10.1111/j.1753-6405.2009.00425.x[published Online First: Epub Date]].  
11 9 20. Andersson HI. The course of non-malignant chronic pain: a 12-year follow-up of a cohort from the  
12 10 general population. *Eur J Pain* 2004;**8**(1):47-53 doi: S1090-3801(03)00064-8 [pii]  
13 11 10.1016/S1090-3801(03)00064-8[published Online First: Epub Date]].  
14 12 21. Fredriksson K, Alfredsson L, Ahlberg G, et al. Work environment and neck and shoulder pain: the  
15 13 influence of exposure time. Results from a population based case-control study. *Occup*  
16 14 *Environ Med* 2002;**59**(3):182-8  
17 15 22. Park JK, Jang SH. Association between Upper Extremity Musculoskeletal Disorders and  
18 16 Psychosocial Factors at Work: A Review on the Job DCS Model's Perspective. *Saf Health Work*  
19 17 2010;**1**(1):37-42 doi: 10.5491/SHAW.2010.1.1.37[published Online First: Epub Date]].  
20 18 23. Kaila-Kangas L, Kivimaki M, Harma M, et al. Sleep disturbances as predictors of hospitalization for  
21 19 back disorders-a 28-year follow-up of industrial employees. *Spine (Phila Pa 1976)*  
22 20 2006;**31**(1):51-6 doi: 00007632-200601010-00012 [pii][published Online First: Epub Date]].  
23 21 24. Hoogendoorn WE, Bongers PM, de Vet HC, et al. Psychosocial work characteristics and  
24 22 psychological strain in relation to low-back pain. *Scand J Work Environ Health*  
25 23 2001;**27**(4):258-67 doi: 613 [pii][published Online First: Epub Date]].  
26 24 25. SBU SCoHTA. Arbetsmiljöns betydelse  
27 25 för sömnstörningar. ISBN 978-91-85413-57-7 ed. Stockholm, 2013.  
28 26 26. Hanson LL, Akerstedt T, Naswall K, Leineweber C, Theorell T, Westerlund H. Cross-lagged  
29 27 relationships between workplace demands, control, support, and sleep problems. *Sleep*  
30 28 2011;**34**(10):1403-10 doi: 10.5665/SLEEP.1288[published Online First: Epub Date]].  
31 29 27. Svensson AC, Fredlund P, Laflamme L, et al. Cohort Profile: The Stockholm Public Health Cohort.  
32 30 *Int J Epidemiol* 2012 doi: dys126 [pii]  
33 31 10.1093/ije/dys126[published Online First: Epub Date]].  
34 32 28. Karasek R, Brisson C, Kawakami N, Houtman I, Bongers P, Amick B. The Job Content  
35 33 Questionnaire (JCQ): an instrument for internationally comparative assessments of  
36 34 psychosocial job characteristics. *J Occup Health Psychol* 1998;**3**(4):322-55  
37 35 29. Job Content Questionnaire Rf. (<http://www.icqcenter.org>)  
38 36 30. Fransson EI, Nyberg ST, Heikkila K, et al. Comparison of alternative versions of the job demand-  
39 37 control scales in 17 European cohort studies: the IPD-Work consortium. *BMC Public Health*  
40 38 2012;**12**:62 doi: 1471-2458-12-62 [pii]  
41 39 10.1186/1471-2458-12-62[published Online First: Epub Date]].  
42 40 31. Folkhälsoinstitut S. Aim and background of questions included in The Swedish Public Health  
43 41 Cohort. ISSN: 1653-0802 2011  
44 42 32. Hogg-Johnson S, van der Velde G, Carroll LJ, et al. The burden and determinants of neck pain in  
45 43 the general population: results of the Bone and Joint Decade 2000-2010 Task Force on Neck  
46 44 Pain and Its Associated Disorders. *J Manipulative Physiol Ther* 2009;**32**(2 Suppl):S46-60 doi:  
47 45 S0161-4754(08)00337-0 [pii]  
48 46 10.1016/j.jmpt.2008.11.010[published Online First: Epub Date]].  
49 47 33. Rothman KJ, Greenland, S. *Introduction to stratified analysis*. 3rd edn ed. Philadelphia: Wolters  
50 48 Kluwer Health/Lippincott Williams&Williams, 2008.  
51  
52  
53  
54  
55  
56  
57  
58  
59  
60

- 1  
2  
3 1 34. Heraclides A, Chandola T, Witte DR, Brunner EJ. Psychosocial stress at work doubles the risk of  
4 2 type 2 diabetes in middle-aged women: evidence from the Whitehall II study. *Diabetes Care*  
5 3 2009;**32**(12):2230-5 doi: dc09-0132 [pii]  
6 4 10.2337/dc09-0132[published Online First: Epub Date]].  
7 5 35. Laszlo KD, Ahnve S, Hallqvist J, Ahlbom A, Janszky I. Job strain predicts recurrent events after a  
8 6 first acute myocardial infarction: the Stockholm Heart Epidemiology Program. *J Intern Med*  
9 7 2010;**267**(6):599-611 doi: JIM2196 [pii]  
10 8 10.1111/j.1365-2796.2009.02196.x[published Online First: Epub Date]].  
11 9 36. Westerlund H, Alexanderson K, Akerstedt T, Magnusson Hanson L, Theorell T, Kivimaki M. Work-  
12 10 related sleep disturbances and sickness absence in the Swedish working population, 1993-  
13 11 1999. *Sleep* 2008;**31**(8):1169-77  
14 12 37. Akerstedt T, Nilsson PM. Sleep as restitution: an introduction. *J Intern Med* 2003;**254**(1):6-12 doi:  
15 13 1195 [pii][published Online First: Epub Date]].  
16 14 38. Karelis CH, Bierma-Zeinstra SM, Burdorf A, Verhagen AP, Nauta AP, Koes BW. Social and  
17 15 psychological factors influenced the course of arm, neck and shoulder complaints. *J Clin*  
18 16 *Epidemiol* 2007;**60**(8):839-48 doi: S0895-4356(06)00459-8 [pii]  
19 17 10.1016/j.jclinepi.2006.11.012[published Online First: Epub Date]].  
20 18  
21 19  
22 20  
23 21  
24 22  
25  
26  
27  
28 23  
29  
30  
31 24  
32  
33  
34 25  
35  
36  
37 26  
38  
39  
40 27  
41  
42  
43 28  
44  
45  
46 29  
47  
48  
49 30  
50  
51 31  
52  
53  
54  
55 32  
56  
57  
58  
59  
60

**Table 1.** Baseline sociodemographic and psychosocial characteristics in the study population of persons with *occasional* neck, shoulder and/or arm pain (NSAP) at baseline (n = 6,979).

|                                                                     | Low strain  |           | Active jobs |           | Passive jobs |           | High strain |           |
|---------------------------------------------------------------------|-------------|-----------|-------------|-----------|--------------|-----------|-------------|-----------|
|                                                                     | (n = 5,358) |           | (n = 1,003) |           | (n = 518)    |           | (n = 100)   |           |
|                                                                     | N           | %         | N           | %         | n            | %         | n           | %         |
| <b>Age (yr)</b>                                                     |             |           |             |           |              |           |             |           |
| Age (yr) 18–44                                                      | 2,981       | <b>56</b> | 613         | <b>61</b> | 348          | <b>67</b> | 64          | <b>64</b> |
| Age (yr) 45–61                                                      | 2,377       | <b>44</b> | 390         | <b>39</b> | 170          | <b>33</b> | 36          | <b>36</b> |
| <b>Sex</b>                                                          |             |           |             |           |              |           |             |           |
| Men                                                                 | 2,145       | <b>40</b> | 384         | <b>38</b> | 158          | <b>30</b> | 32          | <b>32</b> |
| Women                                                               | 3,213       | <b>60</b> | 619         | <b>62</b> | 360          | <b>70</b> | 68          | <b>68</b> |
| <b>Country of birth</b>                                             |             |           |             |           |              |           |             |           |
| Sweden                                                              | 4,600       | <b>86</b> | 899         | <b>90</b> | 404          | <b>78</b> | 83          | <b>83</b> |
| Elsewhere                                                           | 758         | <b>14</b> | 104         | <b>10</b> | 114          | <b>22</b> | 17          | <b>17</b> |
| <b>Socioeconomic class*</b>                                         |             |           |             |           |              |           |             |           |
| Unskilled and semiskilled workers                                   | 656         | <b>13</b> | 64          | <b>7</b>  | 162          | <b>34</b> | 33          | <b>35</b> |
| Skilled workers                                                     | 611         | <b>12</b> | 62          | <b>6</b>  | 76           | <b>16</b> | 11          | <b>11</b> |
| Assistant non-manual employees                                      | 778         | <b>15</b> | 107         | <b>11</b> | 108          | <b>23</b> | 12          | <b>12</b> |
| Intermediate non-manual employees                                   | 1,358       | <b>26</b> | 321         | <b>33</b> | 90           | <b>19</b> | 24          | <b>24</b> |
| Employed/self-employed professionals, civil servants and executives | 1,265       | <b>24</b> | 331         | <b>34</b> | 29           | <b>6</b>  | 10          | <b>10</b> |
| Self-employed (other than professionals)                            | 492         | <b>10</b> | 84          | <b>9</b>  | 8            | <b>2</b>  | 4           | <b>4</b>  |
| <b>Sleep disturbances</b>                                           |             |           |             |           |              |           |             |           |
| None                                                                | 3,861       | <b>72</b> | 601         | <b>60</b> | 326          | <b>63</b> | 54          | <b>54</b> |
| Mild/Severe                                                         | 1,497       | <b>28</b> | 402         | <b>40</b> | 192          | <b>37</b> | 46          | <b>46</b> |
| <b>Work load</b>                                                    |             |           |             |           |              |           |             |           |
| Sedentary                                                           | 2,207       | <b>41</b> | 464         | <b>46</b> | 192          | <b>37</b> | 36          | <b>36</b> |
| Light                                                               | 1,572       | <b>29</b> | 272         | <b>27</b> | 119          | <b>23</b> | 18          | <b>18</b> |

|                                                      |       |           |     |           |     |           |    |           |
|------------------------------------------------------|-------|-----------|-----|-----------|-----|-----------|----|-----------|
| Moderately heavy                                     | 1,156 | <b>22</b> | 192 | <b>19</b> | 149 | <b>29</b> | 18 | <b>18</b> |
| Heavy                                                | 409   | <b>8</b>  | 74  | <b>7</b>  | 56  | <b>11</b> | 27 | <b>27</b> |
| <b>Low support at work from superior (yes)</b>       | 458   | <b>18</b> | 321 | <b>32</b> | 183 | <b>35</b> | 69 | <b>69</b> |
| <b>Low support at work from colleagues (yes)</b>     | 622   | <b>9</b>  | 150 | <b>15</b> | 71  | <b>14</b> | 20 | <b>20</b> |
| <b>Economic stress (yes)†</b>                        | 367   | <b>7</b>  | 77  | <b>8</b>  | 73  | <b>14</b> | 16 | <b>16</b> |
| <b>Household work</b>                                |       |           |     |           |     |           |    |           |
| >5 hrs./week                                         | 2,135 | <b>40</b> | 456 | <b>45</b> | 183 | <b>36</b> | 39 | <b>39</b> |
| <b>Co-morbidity LBP</b>                              |       |           |     |           |     |           |    |           |
| Yes, 2 days or more often during previous six months | 3,318 | <b>62</b> | 648 | <b>65</b> | 345 | <b>67</b> | 67 | <b>67</b> |
| <b>Smoking habits (daily)</b>                        | 702   | <b>13</b> | 121 | <b>12</b> | 79  | <b>15</b> | 13 | <b>13</b> |
| <b>Alcohol (yes, sometime during last 12 months)</b> | 4,945 | <b>93</b> | 949 | <b>95</b> | 458 | <b>89</b> | 87 | <b>87</b> |
| <b>Leisure physical activity level</b>               |       |           |     |           |     |           |    |           |
| Sedentary < 2hr/week                                 | 477   | <b>9</b>  | 102 | <b>10</b> | 83  | <b>16</b> | 18 | <b>18</b> |
| Active ≥2 hrs./week                                  | 4,877 | <b>91</b> | 895 | <b>89</b> | 432 | <b>84</b> | 81 | <b>81</b> |

\*Socioeconomic class: based on occupation and education † Economic stress (“Did it happen that during the past 12 months you ran out of salary/money and had to borrow from relatives and friends in order to pay for food or rent?”)

1  
2  
3  
4  
5  
6  
7

**Table 2.** Associations between active jobs (high job demands/high control) and passive jobs (low job control/low job demands), high strain (high job demands/low job control) and sleep disturbances and the risk of experiencing at least one episode of *troublesome* neck/shoulder/arm pain. The associations are presented as crude and adjusted odds ratios (OR) and 95% confidence intervals (95% CI).

| Exposure                               | No.exp.<br>Cases<br>(total) | Crude<br>OR (95% CI) | P      | Adjusted<br>OR (95% CI) | p      |
|----------------------------------------|-----------------------------|----------------------|--------|-------------------------|--------|
| Low strain<br>(reference)              | 1,219<br>(5,358)            | 1                    | -      | 1                       | -      |
| Active jobs                            | 257<br>(1,003)              | 1.2<br>(1.0–1.4)     | 0.04   | 1.3*<br>(1.1–1.5)       | 0.01   |
| Passive jobs                           | 145<br>(518)                | 1.3<br>(1.1–1.6)     | <0.001 | 1.2*<br>(0.9–1.4)       | ns     |
| High strain                            | 38<br>(100)                 | 2.0<br>(1.3–3.0)     | <0.01  | 1.5*<br>(1.0–2.4)       | ns     |
| No sleep<br>disturbance<br>(reference) | 1,035<br>(4,886)            | 1                    |        | 1                       |        |
| Mild sleep<br>disturbance              | 547<br>(1,905)              | 1.4<br>(1.3–1.6)     | <0.001 | 1.4‡<br>(1.3–1.6)       | <0.001 |
| Severe sleep<br>disturbance            | 77<br>(188)                 | 2.5<br>(1.8–3.3)     | <0.001 | 2.2‡<br>(1.6–3.0)       | <0.001 |

\*Adjusted for socio-economic class, work load and support from superior, ‡  
adjusted for economic stress ns=non significant

1

2

3

4



**Table 3.** Associations between active jobs (high job demands/high job control), passive jobs (low job control/low job demands), high strain (high job demands/low control) and troublesome neck, shoulder and/or arm pain, stratified for *no* sleep disturbances/ sleep disturbances (mild/severe), presented as crude and adjusted odds ratios (OR) and 95% confidence intervals (95% CI).

| Exposure               | No sleep disturbances  |                   |                       |    | Sleep disturbances     |                   |                       | p    |
|------------------------|------------------------|-------------------|-----------------------|----|------------------------|-------------------|-----------------------|------|
|                        | No. exp. Cases (total) | Crude OR (95% CI) | Adjusted* OR (95% CI) | P  | No. exp. Cases (total) | Crude OR (95% CI) | Adjusted* OR (95% CI) |      |
| Low strain (reference) | 808 (3,890)            | 1                 | 1                     |    | 411 (1,468)            | 1                 | 1                     |      |
| Active jobs            | 129 (597)              | 1.0 (0.8–1.3)     | 1.1 (0.9–1.4)         | ns | 128 (396)              | 1.2 (1.0–1.6)     | 1.3 (1.0–1.7)         | 0.02 |
| Passive jobs           | 83 (336)               | 1.3 (1.0–1.7)     | 1.2 (0.9–1.6)         | ns | 62 (192)               | 1.3 (0.9–1.8)     | 1.0 (0.7–1.5)         | ns   |
| High strain            | 15 (54)                | 1.4 (0.8–2.6)     | 1.2 (0.6–2.1)         | ns | 23 (46)                | 2.6 (1.4–4.6)     | 1.8 (1.0–3.5)         | ns   |

\*Adjusted for adjusted for economic stress, ns=non significant

1

1  
2  
3  
4  
5  
6  
7  
8  
9  
10  
11  
12  
13  
14  
15  
16  
17  
18  
19  
20  
21  
22  
23  
24  
25  
26  
27  
28  
29  
30  
31  
32  
33  
34  
35  
36  
37  
38  
39  
40  
41  
42  
43  
44  
45  
46  
47  
48  
49  
50  
51  
52  
53  
54  
55  
56  
57  
58  
59  
60

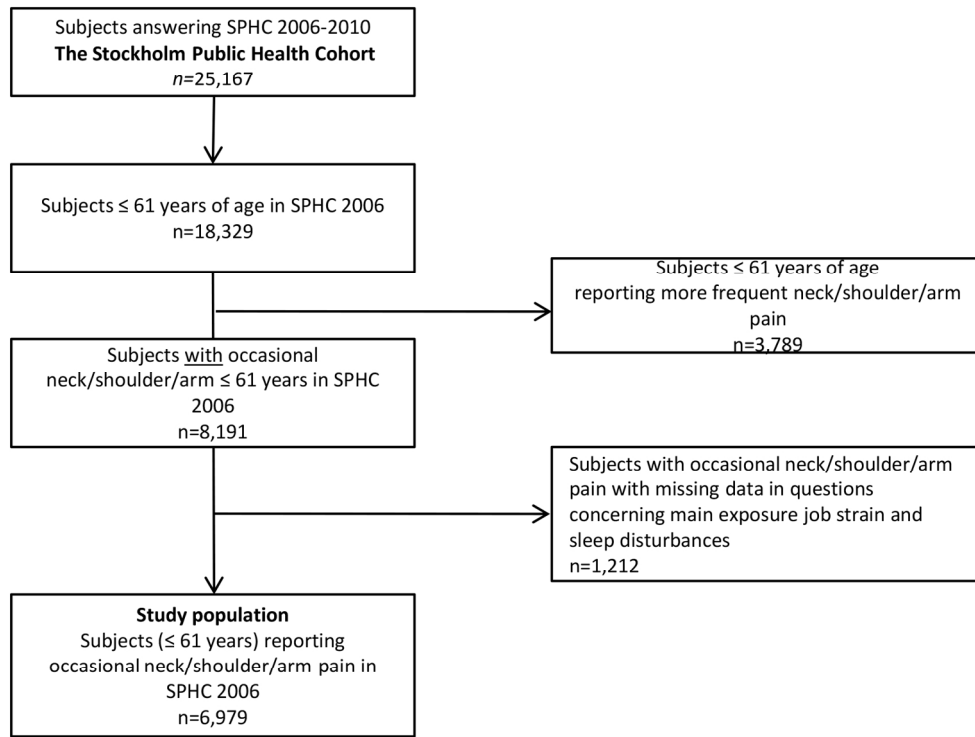

Figure 1 Flowchart of inclusion process  
148x117mm (300 x 300 DPI)

ew only

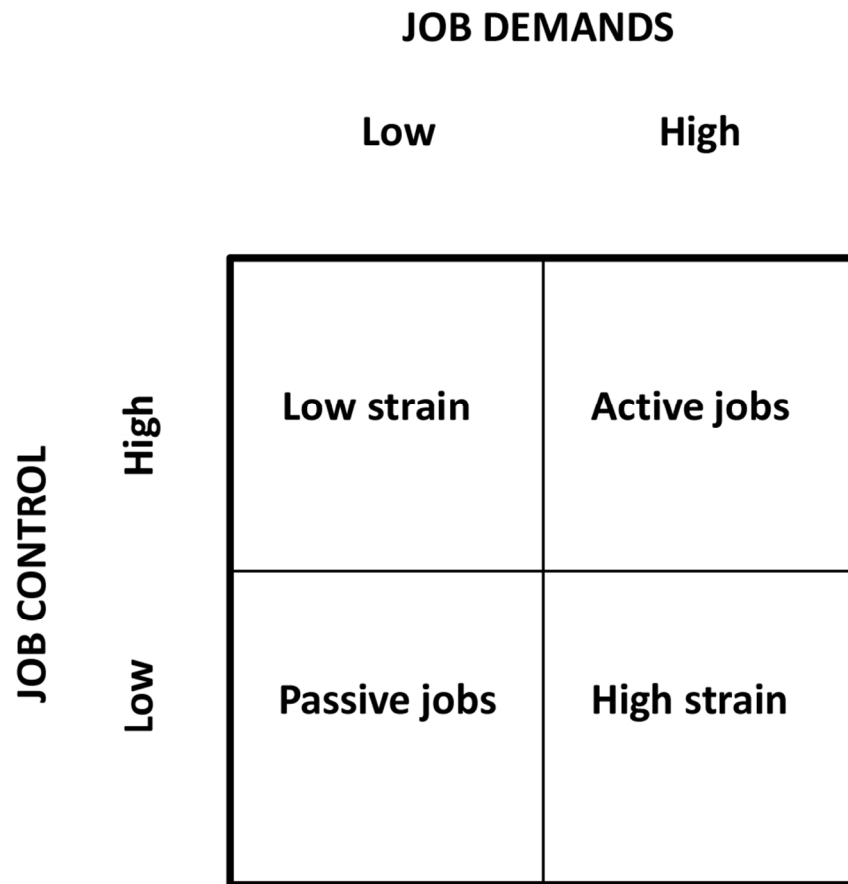

Figure 2 The job strain model [14]  
95x92mm (300 x 300 DPI)

## STROBE Statement—checklist of items that should be included in reports of observational studies

|                                                                                                                                        | Item No | Recommendation                                                                                                                                                                             |
|----------------------------------------------------------------------------------------------------------------------------------------|---------|--------------------------------------------------------------------------------------------------------------------------------------------------------------------------------------------|
| <b>Title and abstract</b>                                                                                                              | 1       | (a) Indicate the study's design with a commonly used term in the title or the abstract                                                                                                     |
| a) Cohort study – in title and in abstract                                                                                             |         |                                                                                                                                                                                            |
| b) This is done in the abstract with headings                                                                                          |         | (b) Provide in the abstract an informative and balanced summary of what was done and what was found                                                                                        |
| <b>Introduction</b>                                                                                                                    |         |                                                                                                                                                                                            |
| Background/rationale                                                                                                                   | 2       | Explain the scientific background and rationale for the investigation being reported                                                                                                       |
| This is summarised in the introduction part of the manuscript. Page 2-3.                                                               |         |                                                                                                                                                                                            |
| Objectives                                                                                                                             | 3       | State specific objectives, including any prespecified hypotheses                                                                                                                           |
| The objectives are stated at page 3, line 20-25                                                                                        |         |                                                                                                                                                                                            |
| <b>Methods</b>                                                                                                                         |         |                                                                                                                                                                                            |
| Study design                                                                                                                           | 4       | Present key elements of study design early in the paper                                                                                                                                    |
| The study design is presented at the first line in the method section, Page 3, line 3-6                                                |         |                                                                                                                                                                                            |
| Setting                                                                                                                                | 5       | Describe the setting, locations, and relevant dates, including periods of recruitment, exposure, follow-up, and data collection                                                            |
| This is presented in the methods section Page 4, line 8-15                                                                             |         |                                                                                                                                                                                            |
| Participants                                                                                                                           | 6       | (a) <i>Cohort study</i> —Give the eligibility criteria, and the sources and methods of selection of participants. Describe methods of follow-up                                            |
| a) This is presented in the method section; Page 4, line 15-23 and page 5, line 1-2                                                    |         | <i>Case-control study</i> —Give the eligibility criteria, and the sources and methods of case ascertainment and control selection. Give the rationale for the choice of cases and controls |
| b) Exposed are n= 6979 and unexposed n=1212. This is presented in a flow chart. Figure 1.                                              |         | <i>Cross-sectional study</i> —Give the eligibility criteria, and the sources and methods of selection of participants                                                                      |
|                                                                                                                                        |         | (b) <i>Cohort study</i> —For matched studies, give matching criteria and number of exposed and unexposed                                                                                   |
|                                                                                                                                        |         | <i>Case-control study</i> —For matched studies, give matching criteria and the number of controls per case                                                                                 |
| Variables                                                                                                                              |         | Clearly define all outcomes, exposures, predictors, potential confounders, and effect modifiers. Give diagnostic criteria, if applicable                                                   |
| Outcomes, exposures, potential predictors, potential confounders are presented in the method section page 5, line 5 to page 8, line 37 |         |                                                                                                                                                                                            |
| Data sources/                                                                                                                          | 8       | For each variable of interest, give sources of data and                                                                                                                                    |

|                        |                                                                                                                                                                           |                                                                                                                                                                                                                                                                                                                                                                                                                                                                                                                                                                   |
|------------------------|---------------------------------------------------------------------------------------------------------------------------------------------------------------------------|-------------------------------------------------------------------------------------------------------------------------------------------------------------------------------------------------------------------------------------------------------------------------------------------------------------------------------------------------------------------------------------------------------------------------------------------------------------------------------------------------------------------------------------------------------------------|
| measurement            | This is presented for all outcomes, potential predictors, confounders in the method section page 5, line 5 to page 8, line3*                                              | details of methods of assessment (measurement). Describe comparability of assessment methods if there is more than one group                                                                                                                                                                                                                                                                                                                                                                                                                                      |
| Bias                   | 9<br>Selection bias; page 13, line 12-17, page 14, 12-16<br>Confounding bias, page 9, line 18-21, page 13,line 8-10                                                       | Describe any efforts to address potential sources of bias                                                                                                                                                                                                                                                                                                                                                                                                                                                                                                         |
| Study size             | 10<br>This is presented in flow-chart, Fig 1                                                                                                                              | Explain how the study size was arrived at                                                                                                                                                                                                                                                                                                                                                                                                                                                                                                                         |
| Quantitative variables | 11<br>Page 7, line 1-14,Page 8, line 5 – Page 9, line 3                                                                                                                   | Explain how quantitative variables were handled in the analyses. If applicable, describe which groupings were chosen and why                                                                                                                                                                                                                                                                                                                                                                                                                                      |
| Statistical methods    | 12<br>a)Page 9, line 5 – Page 10, line 5<br>b) Page 9, line 21-24<br>c) Figure 1 and page 14, line 12-16<br>d) Figure 1<br>e) No sensitivity analysis was performed<br>e) | (a) Describe all statistical methods, including those used to control for confounding<br>(b) Describe any methods used to examine subgroups and interactions<br>(c) Explain how missing data were addressed<br>(d) <i>Cohort study</i> —If applicable, explain how loss to follow-up was addressed<br><i>Case-control study</i> —If applicable, explain how matching of cases and controls was addressed<br><i>Cross-sectional study</i> —If applicable, describe analytical methods taking account of sampling strategy<br>(e) Describe any sensitivity analyses |
| <b>Results</b>         |                                                                                                                                                                           |                                                                                                                                                                                                                                                                                                                                                                                                                                                                                                                                                                   |
| Participants           | 13*<br>See flow-chart –Figure 1                                                                                                                                           | (a) Report numbers of individuals at each stage of study—eg numbers potentially eligible, examined for eligibility, confirmed eligible, included in the study, completing follow-up, and analysed<br>(b) Give reasons for non-participation at each stage<br>(c) Consider use of a flow diagram                                                                                                                                                                                                                                                                   |
| Descriptive data       | 14*<br>a) b)Se table 1-3 and flow-chart Fig 1<br>c) Page 5, line 6-22                                                                                                     | (a) Give characteristics of study participants (eg demographic, clinical, social) and information on exposures and potential confounders<br>(b) Indicate number of participants with missing data for each variable of interest<br>(c) <i>Cohort study</i> —Summarise follow-up time (eg, average and total amount)                                                                                                                                                                                                                                               |
| Outcome data           | 15*<br>Page 8, line 5-10,<br>Page 10, line 12-18                                                                                                                          | <i>Cohort study</i> —Report numbers of outcome events or summary measures over time<br><i>Case-control study</i> —Report numbers in each exposure category, or summary measures of exposure                                                                                                                                                                                                                                                                                                                                                                       |

|    |                                    |    |                                                                                    |
|----|------------------------------------|----|------------------------------------------------------------------------------------|
|    |                                    |    | <i>Cross-sectional study</i> —Report numbers of outcome events or summary measures |
| 1  |                                    |    |                                                                                    |
| 2  |                                    |    |                                                                                    |
| 3  |                                    |    |                                                                                    |
| 4  | Main results                       | 16 |                                                                                    |
| 5  |                                    |    | (a) Give unadjusted estimates and, if applicable,                                  |
| 6  | Table 2 and 3                      |    | confounder-adjusted estimates and their precision (eg,                             |
| 7  | Page 10, line 20 – page 11, line 5 |    | 95% confidence interval). Make clear which                                         |
| 8  | b) N/A                             |    | confounders were adjusted for and why they were                                    |
| 9  | c)N/A                              |    | included                                                                           |
| 10 |                                    |    |                                                                                    |
| 11 |                                    |    | (b) Report category boundaries when continuous                                     |
| 12 |                                    |    | variables were categorized                                                         |
| 13 |                                    |    |                                                                                    |
| 14 |                                    |    | (c) If relevant, consider translating estimates of                                 |
| 15 |                                    |    | relative risk into absolute risk for a meaningful time                             |
| 16 |                                    |    | period                                                                             |
| 17 | Other analyses                     | 17 | Report other analyses done—eg analyses of                                          |
| 18 | Table 3                            |    | subgroups and interactions, and sensitivity analyses                               |
| 19 | Page 11, line 8-14                 |    |                                                                                    |
| 20 |                                    |    |                                                                                    |
| 21 | <b>Discussion</b>                  |    |                                                                                    |
| 22 | Key results                        | 18 | Summarise key results with reference to study                                      |
| 23 | Page 11, line 19-23                |    | objectives                                                                         |
| 24 | Limitations                        | 19 | Discuss limitations of the study, taking into account                              |
| 25 | Page 13, line7-Page 14, line 17    |    | sources of potential bias or imprecision. Discuss both                             |
| 26 |                                    |    | direction and magnitude of any potential bias                                      |
| 27 |                                    |    |                                                                                    |
| 28 | Interpretation                     | 20 | Give a cautious overall interpretation of results                                  |
| 29 | Page 14, line 19 – Page 14 line 3  |    | considering objectives, limitations, multiplicity of                               |
| 30 | Page 15, line 6-11                 |    | analyses, results from similar studies, and other                                  |
| 31 |                                    |    | relevant evidence                                                                  |
| 32 |                                    |    |                                                                                    |
| 33 | Generalisability                   | 21 | Discuss the generalisability (external validity) of the                            |
| 34 | Page 11, line 19-23                |    | study results                                                                      |
| 35 | Page 12, line 1-2                  |    |                                                                                    |
| 36 | Page 14, line 24                   |    |                                                                                    |
| 37 |                                    |    |                                                                                    |
| 38 | <b>Other information</b>           |    |                                                                                    |
| 39 | Funding                            | 22 | Give the source of funding and the role of the funders                             |
| 40 | Page 15, line 13-15                |    | for the present study and, if applicable, for the                                  |
| 41 |                                    |    | original study on which the present article is based                               |
| 42 |                                    |    |                                                                                    |
| 43 |                                    |    |                                                                                    |
| 44 |                                    |    |                                                                                    |
| 45 | Continued on next page             |    |                                                                                    |
| 46 |                                    |    |                                                                                    |
| 47 |                                    |    |                                                                                    |
| 48 |                                    |    |                                                                                    |
| 49 |                                    |    |                                                                                    |
| 50 |                                    |    |                                                                                    |
| 51 |                                    |    |                                                                                    |
| 52 |                                    |    |                                                                                    |
| 53 |                                    |    |                                                                                    |
| 54 |                                    |    |                                                                                    |
| 55 |                                    |    |                                                                                    |
| 56 |                                    |    |                                                                                    |
| 57 |                                    |    |                                                                                    |
| 58 |                                    |    |                                                                                    |
| 59 |                                    |    |                                                                                    |
| 60 |                                    |    |                                                                                    |

1  
2  
3  
4 \*Give information separately for cases and controls in case-control studies and, if applicable, for exposed and  
5 unexposed groups in cohort and cross-sectional studies.  
6  
7

8 **Note:** An Explanation and Elaboration article discusses each checklist item and gives methodological background and  
9 published examples of transparent reporting. The STROBE checklist is best used in conjunction with this article (freely  
10 available on the Web sites of PLoS Medicine at <http://www.plosmedicine.org/>, Annals of Internal Medicine at  
11 <http://www.annals.org/>, and Epidemiology at <http://www.epidem.com/>). Information on the STROBE Initiative is  
12 available at [www.strobe-statement.org](http://www.strobe-statement.org).  
13  
14  
15  
16  
17  
18  
19  
20  
21  
22  
23  
24  
25  
26  
27  
28  
29  
30  
31  
32  
33  
34  
35  
36  
37  
38  
39  
40  
41  
42  
43  
44  
45  
46  
47  
48  
49  
50  
51  
52  
53  
54  
55  
56  
57  
58  
59  
60
